# Supplementary material for: Genome-Wide SNP and STR Discovery in the Japanese Crested Ibis and Genetic Diversity among Founders of the Japanese Population
Source: PLoS One. 2013 Aug 21;8(8):e72781. doi: 10.1371/journal.pone.0072781 (PMC3749161; doi:10.1371/journal.pone.0072781)
Supplement: Table S4 — Mapping results of 162 putative STRs. (XLS) [file pone.0072781.s004.xls]

## Sheet: 2baseSTR_list2
Table S4. Mapping results of 162 putative STRs
		specific allele					Mapped Reads #
			Consensus ID	Consensus Sequence	STR location	Repeat Info	A	B	C	D	E
1	2bp-STR-1		HaeIII_Both-Ends_CC-103190_CID-62638:2509757_num=263;Others-424185_CID-5705077:8278580_num=18	CCAAACTAGAAACGGGATGGGATTTGAAAGCCTTTTTTGTGTGTGTGTGTGTGTGTGTAAAATATAAATAAAAGCATGAGCTTATGATCACAGGGAAGCAGN98NAAACAGTTTGTTACAGCCATGAGCCCATTAATTAAGTGGAAGTTATCCCAGCGCAGAGGGCTTCTGCAAATGCCTTTACTCCATGCATGACCTACTTCAGG	R1@[1]TG:10:38:57@R2@len=296;R1@[1]TG:10:38:57@R2@len=296	[1]TG:10	34	138	206	146	34
			HaeIII_Both-Ends_CC-300259_CID-62639:2509757_num=49	CCAAACTAGAAACGGGATGGGATTTGAAAGCCTTTTTTGTGTGTGTGTGTGTGTGTGTGTGTGTGTGTGTGTGTGTGTGTGTAAAATATAAATAAAAGCATN98NAAACAGTTTGTTACAGCCATGAGCCCATTAATTAAGTGGAAGTTATCCCAGCGCAGAGGGCTTCTGCAAATGCCTTTACTCCATGCATGACCTACTTCAGG	R1@[1]TG:22:38:81@R2@len=272	[1]TG:22	34	0	0	0	64
2	2bp-STR-2		HaeIII_Both-Ends_CC-269844_CID-384476:813558_num=67	CCATTTCTCAGACAGCTGGAAGATGACATCTCAGCTGATAGCTAAAGAAGAAAGAGCCAGTTAGAAATAGGCACACACACACACACACACATTGAGAAATAN98NACCGAGCACTGTGGGCAGATCAGAAACCCTCCTCCTAAACCCCCTGAAGGCTGTGGTGCTCTTGCTTGCAGCTCTTGGGTGGGTCCCTGAAAAGATTCTGG	R1@[1]CA:10:72:91@R2@len=296	[1]CA:10	0	76	0	70	0
			HaeIII_Both-Ends_CC-111279_CID-813558:1689763_num=249;Others-421433_CID-6092942:6435304_num=18	CCAGAATCTTTTCAGGGACCCACCCAAGAGCTGCAAGCAAGAGCACCACAGCCTTCAGGGGGTTTAGGAGGAGGGTTTCTGATCTGCCCACAGTGCTCGGTN98NTGTATTTCTCAATGTGTGTGTGTGTGTGTGCCTATTTCTAACTGGCTCTTTCTTCTTTAGCTATCAGCTGAGATGTCATCTTCCAGCTGTCTGAGAAATGG	R1@R2@[1]CA:9:72:89@len=298;R1@R2@[1]CA:9:72:89@len=298	[1]CA:9	84	60	220	70	100
3	2bp-STR-3		HaeIII_Both-Ends_CC-123631_CID-429051:3199080_num=229;Others-361559_CID-2430653:5940171_num=20	CCACACAGGCTTTTTGTTTTTTCTTTGCAGAAGCTGCTGGGTTCAGCAGGTCTCTCTCTCTCTCTCACACTGAGATCCTCTCCTTGTGAGTAAATGCGTGAN98NCTACTTGGTCAAAGTCTCCTGAAACACTTCTGTCTGCTGATGGCTCATGTGAGGGACAGAGCATGAGTCACGGCGTGACCATCTTGACTAACCAGGGGAGG	R1@[1]TC:8:51:66@R2@len=300;R1@R2@[1]TC:8:51:66@len=300	[1]TC:8	130	82	84	124	78
			HaeIII_Both-Ends_CC-149088_CID-429050:3199080_num=191;Others-430707_CID-2430653:5940170_num=18	CCACACAGGCTTTTTGTTTTTTCTTTGCAGAAGCTGCTGGGTTCAGCAGGTCTCTCTCTCTCTCTCTCACACTGAGATCCTCTCCTTGTGAGTAAATGCGTN98NCTACTTGGTCAAAGTCTCCTGAAACACTTCTGTCTGCTGATGGCTCATGTGAGGGACAGAGCATGAGTCACGGCGTGACCATCTTGACTAACCAGGGGAGG	R1@[1]TC:9:51:68@R2@len=298;R1@R2@[1]TC:9:51:68@len=298	[1]TC:9	0	112	106	118	82
4	2bp-STR-4		HaeIII_Both-Ends_CC-132014_CID-3313395:3501292_num=216	CCTCTTTTAGATGACACAGTAGTGTGTGTGTGTGTGTGTGTGAGAGAGAGAGAGAGAGGGAAAGAGACGGAGTCACATACGAGGCTCCTCACAGACCTCTGN98NTGGGAGGGAAGTTTTGTTGACTCTTACGAGCACAGGGCATTCAGAAGAAAGAATTCCTCTGAATACTCCCACATGAAAGTAGAGAGGGGTCTGCCCACAGG	R1@[1]GT:10:22:41@[2]GA:8:42:57@R2@len=296	[1]GT:10-[2]GA:8	114	72	82	84	100
			HaeIII_Both-Ends_CC-184180_CID-3501292:4173413_num=146;Others-658210_CID-8262068:8426480_num=13	CCTGTGGGCAGACCCCTCTCTACTTTCATGTGGGAGTATTCAGAGGAATTCTTTCTTCTGAATGCCCTGTGCTCGTAAGAGTCAACAAAACTTCCCTCCCAN98NGAGGTCTGTGAGGAGCCTCGTATGTGACTCCGTCTCTTTCCCTCTCTCTCTCTCTCTCTCACACACACACACACACACACTACTGTGTCATCTAAAAGAGG	R1@R2@[1]GT:10:22:41@[2]GA:9:42:59@len=294;R1@[1]GT:10:22:41@[2]GA:9:42:59@R2@len=294	[1]GT:10-[2]GA:9	0	62	78	84	92
5	2bp-STR-5		HaeIII_Both-Ends_CC-461139_CID-2219931:2321565_num=10	CCCCCAGGAACCGCTGCCCCCCTCCCCTTCTCCCCTCTTTTGCACACACACACACACACACACGCACGCACACACAAAATAAATAAATAACGAGGCGGCTGN98NAATGGAAATTATTTATAGGCTGCCTACGATGCCTTTCTCGTCACGGAGGCTCGGTGCGGAGAGGCGCACTCGCGGCTCCCAGCACGGAGAGGCGTGCGGGG	R1@[1]CA:10:43:62@R2@len=296	[1]CA:10	18	0	0	0	0
		A	HaeIII_Both-Ends_CC-157422_CID-2219925:2321565_num=180;Others-296204_CID-6709749:6740087_num=22	CCCCCAGGAACCGCTGCCCCCCTCCCCTTCTCCCCTCTTTTGCACACACACACACACACGCACGCACACACAAAATAAATAAATAACGAGGCGGCTGGAGCN98NAATGGAAATTATTTATAGGCTGCCTACGATGCCTTTCTCGTCACGGAGGCTCGGTGCGGAGAGGCGCACTCGCGGCTCCCAGCACGGAGAGGCGTGCGGGG	R1@[1]CA:8:43:58@R2@len=300;R1@[1]CA:8:43:58@R2@len=300	[1]CA:8	40	72	88	78	116
6	2bp-STR-6		HaeIII_Both-Ends_CC-332300_CID-700562:2557225_num=35	CCACTAGCTAGTCCTCTGCAGGTAACTATTTTTTTATAAAAATACCCTTTGTGTGTAAAAATACATATATATATATATATATATTGCTTTCTCACGGACTGN98NCAGCTGCGTCTGGAAGCTAAACGGGGCAAAGCCCTGTGCGTGGGGCGTTGTAACTCAGCTGGCTCTGGCGTTAAATTGGTAGGATTGAGAATTAACGCGGG	R1@[1]AT:10:65:84@R2@len=296	[1]AT:10	40	24	2	0	4
			HaeIII_Both-Ends_CC-161566_CID-700560:2557225_num=174;Others-334281_CID-1804314:6824225_num=21	CCACTAGCTAGTCCTCTGCAGGTAACTATTTTTTTATAAAAATACCCTTTGTATGTAAAAATACATATATATATATATATATTGCTTTCTCACGGACTGATN98NCAGCTGCGTCTGGAAGCTAAACGGGGCAAAGCCCTGTGCGTGGGGCGTTGTAACTCAGCTGGCTCTGGCGTTAAATTGGTAGGATTGAGAATTAACGCGGG	R1@[1]AT:9:65:82@R2@len=298;R1@[1]AT:9:65:82@R2@len=298	[1]AT:9	56	34	96	110	92
7	2bp-STR-7	A	HaeIII_Both-Ends_CC-441781_CID-1648368:4102478_num=12	CCTTTCTTTTGTTTAGTTAAGTGACTAAGATATTTAAATATACTCCTTGCCCCTAGGCTTTTCAGGAGGCATTTTGATGCAGTGGCTTTGTCTATCTTGGCN98NTTTTTTTTTTTTTTGACAGAAAGGGAGATTACTTTCTGGTAAAGGGAGTTCTTCCAGATGTGCAGAACTGCACCATGGAGAGAGAGAGAGAGAGAGAGAGG	R1@R2@[1]CT:11:2:23@len=294	[1]CT:11	28	0	0	0	0
			HaeIII_Both-Ends_CC-170653_CID-1648368:4102180_num=163	CCTTTCTTTTGTTTAGTTAAGTGACTAAGATATTTAAATATACTCCTTGCCCCTAGGCTTTTCAGGAGGCATTTTGATGCAGTGGCTTTGTCTATCTTGGCN98NTTTTTTTTTTTTTTTTTTTTAACAGAAAGGGAGATTACTTTCTGGTAAAGGGAGTTCTTCCAGATGTGCAGAACTGCACCATGGAGAGAGAGAGAGAGAGG	R1@R2@[1]CT:8:2:17@len=300	[1]CT:8	20	86	134	62	42
8	2bp-STR-8		HaeIII_Both-Ends_CC-202035_CID-195856:4249297_num=126	CCAACTGAGATGCAAACAGCAAAGTCTGTCGCGAAGAATAGCAGCAACAGTTGTTTCACGGGTGATTTTGTGTGTGTGTGTGTGTGTGTTTTTCTCTCACAN98NGTGCACCATTAAAAGCATTTACCCCAAGGTCACAGAGGGAATCGGCAGCAGAAGTGCATATTAATAACAAAGTCTCCTGGCTCCTAGCCTGCTCTATCAGG	R1@[1]TG:10:69:88@R2@len=296	[1]TG:10	0	96	120	54	0
			HaeIII_Both-Ends_CC-172173_CID-184342:4249297_num=161	CCAACTGAGATGCAAACAGCAAAGTCTGTCGCGAAGAATAGCAGCAACAGTTGTTTCACGGGTGATTTTGTGTGTGTGTGTGTGTGTTTTTCTCTCACAGCN98NGTGCACCATTAAAAGCATTTACCCCAAGGTCACAGAGGGAATCGGCAGCAGAAGTGCATATTAATAACAAAGTCTCCTGGCTCCTAGCCTGCTCTATCAGG	R1@[1]TG:9:69:86@R2@len=298	[1]TG:9	68	80	72	54	66
9	2bp-STR-9		HaeIII_Both-Ends_CC-236117_CID-241963:3224610_num=93	CCAAGCAAAGATGCTGCAGCACTTCGATATACGTACATACGTATATATACGTGCATATATATACACACACACACACACATATATATATTTTTTCCAAGCTAN98NAGATCTCCCTGCTGACCCCGCTCTCACCGCACGTTCAGAAGTTATTAACTTTAACAGAGTCGGTTTGAACTTGCGCCCCAAGGAAACCCCCGATGTCGCGG	R1@[1]AC:8:63:78@R2@len=300	[1]AC:8	22	58	76	38	0
			HaeIII_Both-Ends_CC-209445_CID-3077708:3224610_num=118	CCGAGCAAAGATGCTGCAGCACTTCGATATACGTACATACGTATATATACGTGCATATATATACACACACACACACACACATATATATATTTTTTCCAAGCN98NAGATCTCCCTGCTGACCCCGCTCTCACCGCACGTTCAGAAGTTATTAACTTTAACAGAGTCGGTTTGAACTTGCGCCCCAAGGAAACCCCCGATGTCGCGG	R1@[1]AC:9:63:80@R2@len=298	[1]AC:9	18	50	78	66	40
10	2bp-STR-10		HaeIII_Both-Ends_CC-420300_CID-621089:4313270_num=14	CCCCCTGGCTCCCCCCAGGTAAGGGCGCTGCTCCGCGGGTCGCCTCTCGGCAGCGGCAGCGCCGCGGGGAAGTTGTTGCCGGCTCCGCGATGCGAGGTGATN98NTCCTGTTCTCATTGTTGTTACATATATATATATATATATATATATATATTTATTTTTTGCCGCGTGGAAATTTGCGAGCGGTACCAGAGCACAAGGGCAGG	R1@R2@[1]AT:14:53:80@len=288	[1]AT:14	14	12	0	4	0
			HaeIII_Both-Ends_CC-240408_CID-621089:4313268_num=89	CCCCCTGGCTCCCCCCAGGTAAGGGCGCTGCTCCGCGGGTCGCCTCTCGGCAGCGGCAGCGCCGCGGGGAAGTTGTTGCCGGCTCCGCGATGCGAGGTGATN98NGAGAGCAGCGTCCTGTTCTCATTGTTGTTACATATATATATATATATATTTATTTTTTGCCGCGTGGAAATTTGCGAGCGGTACCAGAGCACAAGGGCAGG	R1@R2@[1]AT:9:53:70@len=298	[1]AT:9	36	22	40	24	74
11	2bp-STR-11		HaeIII_Both-Ends_CC-299081_CID-2462981:4368185_num=50	CCCCTGCTTGGGGGCGGGGGGGAGAGAGAGAGAGAGAGAGAGTCCTTCCTCTTGGGAATGACCAGGACTGACTGTCAGCCCTGGTTGATCCTTGAGGAGATN98NTTCCTGGAAAGAGATGTGAGCAGTTACAAGCTGCTGCTACCCCTGAGACACTGAGCTAATCTAGCAAGTGCACTATCTTGTTCTCTGCCTCCCAAAGCAGG	R1@[1]GA:10:22:41@R2@len=296	[1]GA:10	28	0	68	0	10
			HaeIII_Both-Ends_CC-243340_CID-2462965:4368185_num=87	CCCCTGCTTGGGGGCGGGGGGGAGAGAGAGAGAGAGAGAGTCCTTCCTCTTGGGAATGACCAGGACTGACTGTCAGCCCTGGTTGATCCTTGAGGAGATACN98NTTCCTGGAAAGAGATGTGAGCAGTTACAAGCTGCTGCTACCCCTGAGACACTGAGCTAATCTAGCAAGTGCACTATCTTGTTCTCTGCCTCCCAAAGCAGG	R1@[1]GA:9:22:39@R2@len=298	[1]GA:9	4	42	68	56	12
12	2bp-STR-12		HaeIII_Both-Ends_CC-243382_CID-2304619:3955176_num=87	CCCCCTTGTAGCAAGCTGCCTGCCCTAGGAGCAGCCTAGTTTCGTGCATCCTATGGATTTTAAGCAAAATATATATATATATATATATAAAACTGTAAAACN98NCCTGCTGTAATGCTGCTGGATTCCCATTCCCTTTCTCACGAAGCCTTTTTGGGGCAGAAATTGTGAGTGTGTTGGGTCACCCTGTGCCCTACCATGGGAGG	R1@[1]AT:10:69:88@R2@len=296	[1]AT:10	68	26	38	0	50
			HaeIII_Both-Ends_CC-354976_CID-2304617:3955176_num=28	CCCCCTTGTAGCAAGCTGCCTGCCCTAGGAGCAGCCTAGTTTCGTGCATCCTATGGATTTTAAGCAAAATATATATATATATATATATATAAAACTGTAAAN98NCCTGCTGTAATGCTGCTGGATTCCCATTCCCTTTCTCACGAAGCCTTTTTGGGGCAGAAATTGTGAGTGTGTTGGGTCACCCTGTGCCCTACCATGGGAGG	R1@[1]AT:11:69:90@R2@len=294	[1]AT:11	4	24	0	30	2
13	2bp-STR-13		HaeIII_Both-Ends_CC-249311_CID-310428:4632350_num=82	CCCAGGTCATCTGAAAGTTGTCATCACCTAGAATTTCAATCTACTTGTATTTGCCCTGTGTGATTAAATATTCATGCCAGGATATTCTGCCATGCACAATGN98NCCAGATGTCTATACAATCATCCCATTCCCAGACACTGATTTTTTTACACACACACACACACACACACACACACAAAACCCTGCTTATCTTGTCTGATAAGG	R1@R2@[1]TG:14:28:55@len=288	[1]TG:14	46	44	22	34	34
			HaeIII_Both-Ends_CC-386666_CID-310428:4632348_num=20	CCCAGGTCATCTGAAAGTTGTCATCACCTAGAATTTCAATCTACTTGTATTTGCCCTGTGTGATTAAATATTCATGCCAGGATATTCTGCCATGCACAATGN98NATGTCTATACAATCATCCCATTCCCAGACACTGATTTTTTTACACACACACACACACACACACACACACACACAAAACCCTGCTTATCTTGTCTGATAAGG	R1@R2@[1]TG:16:28:59@len=284	[1]TG:16	0	0	22	0	28
14	2bp-STR-14		HaeIII_Both-Ends_CC-274556_CID-2968489:3259124_num=64	CCCTTCTCTCAGTCCCTCCCCTTTCGCCGTCCCCTCTCTTTCTCTCTCTCTCTCTCTTCCTGAACTTTAGTGAATCTTGAGATATAAAGAAAGCAGCTGCCN98NAGACCTCATCTCCAAGGGCTTTAATTCCTCTGGATGCAAGGACAAAGCCAGGGTGAGTAGCCTGCTAGTGACTCTGCCGGTCACTGCCTCTGCAAACGCGG	R1@[1]TC:8:41:56@R2@len=300	[1]TC:8	10	12	88	20	8
			HaeIII_Both-Ends_CC-448505_CID-2968488:3259124_num=11	CCCTTCTCTCAGTCCCTCCCCTTTCGCCGTCCCCTCTCTTTCTCTCTCTCTCTCTCTCTTCCTGAACTTTAGTGAATCTTGAGATATAAAGAAAGCAGCTGN98NAGACCTCATCTCCAAGGGCTTTAATTCCTCTGGATGCAAGGACAAAGCCAGGGTGAGTAGCCTGCTAGTGACTCTGCCGGTCACTGCCTCTGCAAACGCGG	R1@[1]TC:9:41:58@R2@len=298	[1]TC:9	0	22	0	0	0
15	2bp-STR-15		HaeIII_Both-Ends_CC-290863_CID-804758:4108726_num=54	CCAGAAGCCTAGGGAGAAAAACCAAAGGACAGAGAGGGGGGAAAGCCTCCACCATCTTTGGGTTCTAGACACATAGATCATATTCCAGAATTCATCATGTAN98NTCATTCAATAACTCTAATAGATCTGGGCAAATATTGCTTTGGGTTTTTTTGTTTGTTTGTGTGTGTGTGTGTGTGTGTGTGTGTGTGTGTGTTTTCAGAGG	R1@R2@[1]AC:17:10:43@len=282	[1]AC:17	20	20	12	4	54
			HaeIII_Both-Ends_CC-435388_CID-804758:4108737_num=12	CCAGAAGCCTAGGGAGAAAAACCAAAGGACAGAGAGGGGGGAAAGCCTCCACCATCTTTGGGTTCTAGACACATAGATCATATTCCAGAATTCATCATGTAN98NATTCAATAACTCTAATAGATCTGGGCAAATATTGCTTTGGGTTTTTTTGTTTGTTTGTGTGTGTGTGTGTGTGTGTGTGTGTGTGTGTGTGTTTTCAGAGG	R1@R2@[1]AC:18:10:45@len=280	[1]AC:18	0	0	0	24	0
16	2bp-STR-16		HaeIII_Both-Ends_CC-381400_CID-3719682:4489634_num=21	CCTAATTTTGGCATCTCTTGCCTCATGGGTTTTTCAGTCTTAACAGTATTCTTATAGCCTATTTTTATATGCAATACATATGCAGCATTTGCAGACAGATGN98NGAGCATCCTGTACAGTCTAACCTTCCACAAAGCCAGGCAGTGGAGTTTCATCATCTTCCTCAGCTCCTGGGAGCCACACACACACACACACACACACCAGG	R1@R2@[1]GT:11:5:26@len=294	[1]GT:11	0	14	0	2	28
			HaeIII_Both-Ends_CC-298664_CID-3719682:4489636_num=50	CCTAATTTTGGCATCTCTTGCCTCATGGGTTTTTCAGTCTTAACAGTATTCTTATAGCCTATTTTTATATGCAATACATATGCAGCATTTGCAGACAGATGN98NTATGGAGCATCCTGTACAGTCTAACCTTCCACAAAGCCAGGCAGTGGAGTTTCATCATCTTCCTCAGCTCCTGGGAGCCACACACACACACACACACCAGG	R1@R2@[1]GT:9:5:22@len=298	[1]GT:9	22	18	28	6	36
17	2bp-STR-17		HaeIII_Both-Ends_CC-301731_CID-130028:522310_num=49	CCAAATTATTTATATATATATATATACGTATGTATGTATTTTTAAAATCAAGAAGTGAAATGGTCTTAATATTATGGGGGTTGCAGAAGTGCCTCAGTGCAN98NATTGCCTTTGTGCAGAACAAGGACAGCGGCTCGGGATTCAGCCATGAAAGCAATAGCAGTGTGGAGTGGCTAGAAGTTTAATGACCAAGTAAATTTGGTGG	R1@[1]TA:8:11:26@R2@len=300	[1]TA:8	14	34	16	36	6
			HaeIII_Both-Ends_CC-411377_CID-130029:522310_num=16	CCAAATTATTTATATATATATATATATACGTATGTATGTATTTTTAAAATCAAGAAGTGAAATGGTCTTAATATTATGGGGGTTGCAGAAGTGCCTCAGTGN98NATTGCCTTTGTGCAGAACAAGGACAGCGGCTCGGGATTCAGCCATGAAAGCAATAGCAGTGTGGAGTGGCTAGAAGTTTAATGACCAAGTAAATTTGGTGG	R1@[1]TA:9:11:28@R2@len=298	[1]TA:9	10	0	16	0	6
18	2bp-STR-18		HaeIII_Both-Ends_CC-301812_CID-1209729:4254292_num=49	CCAGGGGTTGTGCTGCTGCCCAGCTGGGAGCCAGCTACTGGATAGACTGACATCTGCTACTGGAGTCATCCATATTGGGTGTATATAGGGGTATACATATGN98NACATATCTATACATGCAGACACACTTTTTATATATATATATATATATAGTCCACTAGCAGATGTCAATCCTGATCAGCTGGAGAGGCGAGGCAGGATCAGG	R1@R2@[1]TA:10:54:73@len=296	[1]TA:10	18	42	28	14	0
			HaeIII_Both-Ends_CC-434169_CID-1209729:4254296_num=13	CCAGGGGTTGTGCTGCTGCCCAGCTGGGAGCCAGCTACTGGATAGACTGACATCTGCTACTGGAGTCATCCATATTGGGTGTATATAGGGGTATACATATGN98NATATCTATACATGCAGACACACTTTTTATATATATATATATATATATAGTCCACTAGCAGATGTCAATCCTGATCAGCTGGAGAGGCGAGGCAGGATCAGG	R1@R2@[1]TA:11:54:75@len=294	[1]TA:11	0	2	24	0	0
19	2bp-STR-19		HaeIII_Both-Ends_CC-226855_CID-3784647:4418943_num=101	CCTTTAAAATTTTATTTGTATCCACTTGTGTTTTCTATTCCCCGTCCGCTTGTACAAGCTAGAAGCAGGCTCAGCAGCAGCCAGGGTGTTTTCCTGTCTATN98NGAAGGACCCAGGGTATTATTATATTTTATATATATATATATATATATTATATATCTGTGTCTGTCTTTAGATAGACAGTAGGTGCGATCACCACCGCCAGG	R1@R2@[1]AT:10:55:74@len=296	[1]AT:10	72	56	28	26	40
			HaeIII_Both-Ends_CC-306723_CID-3784647:4418945_num=46	CCTTTAAAATTTTATTTGTATCCACTTGTGTTTTCTATTCCCCGTCCGCTTGTACAAGCTAGAAGCAGGCTCAGCAGCAGCCAGGGTGTTTTCCTGTCTATN98NCTGAAGGACCCAGGGTATTATTATATTTTATATATATATATATATATTATATATCTGTGTCTGTCTTTAGATAGACAGTAGGTGCGATCACCACCGCCAGG	R1@R2@[1]AT:9:55:72@len=298	[1]AT:9	2	0	34	32	30
20	2bp-STR-20		HaeIII_Both-Ends_CC-314353_CID-1521081:4294144_num=43	CCATGATAAAGAGGCACCAAAAACTCTATGAATTAAGGAGTGAAAGATGTGGAGAGAGAGAGAGAGAGAGAAAATTAGTCTTGTTGGAACATTGATTATAAN98NTCCCTCTGAAGCACCTCTCAGTCTGGAAAAGTCAAAGAAACTGGCACAATCTCTGCTTCCAGTGGATCAGAGCAAGCCTGGAAACAGTCTGGATATGCAGG	R1@[1]GA:10:52:71@R2@len=296	[1]GA:10	6	22	32	18	10
			HaeIII_Both-Ends_CC-410916_CID-1521082:4294144_num=16	CCATGATAAAGAGGCACCAAAAACTCTATGAATTAAGGAGTGAAAGATGTGGAGAGAGAGAGAGAGAGAGAGAAAATTAGTCTTGTTGGAACATTGATTATN98NTCCCTCTGAAGCACCTCTCAGTCTGGAAAAGTCAAAGAAACTGGCACAATCTCTGCTTCCAGTGGATCAGAGCAAGCCTGGAAACAGTCTGGATATGCAGG	R1@[1]GA:11:52:73@R2@len=294	[1]GA:11	8	0	30	0	0
21	2bp-STR-21		HaeIII_Both-Ends_CC-416189_CID-2344515:3870333_num=15	CCCCGCGTTTGCAAAGCCACCGGCTCCTGTCCCTTGCAGGCTGGGGCGGAGGAGCCAGAGAAGGGACCGTGCAGCCCCGCAGCGCTGCTTTCAGCCCCTTTN98NACATGTGCACACACACACACACACACATTAACACCCTCATCTTTTCCAGTGACTAAGCCCCTGTCTAATGCATTCTGTTCCTGTCCCCTCAGGTGCTGAGG	R1@R2@[1]TG:10:75:94@len=296	[1]TG:10	0	0	0	0	30
			HaeIII_Both-Ends_CC-316083_CID-2344515:3159210_num=42	CCCCGCGTTTGCAAAGCCACCGGCTCCTGTCCCTTGCAGGCTGGGGCGGAGGAGCCAGAGAAGGGACCGTGCAGCCCCGCAGCGCTGCTTTCAGCCCCTTTN98NGGACACATGTGCACACACACACACACATTAACACCCTCATCTTTTCCAGTGACTAAGCCCCTGTCTAATGCATTCTGTTCCTGTCCCCTCAGGTGCTGAGG	R1@R2@[1]TG:8:75:90@len=300	[1]TG:8	4	20	0	28	34
21.6704	2bp-STR-22		HaeIII_Both-Ends_CC-140654_CID-56997:368797_num=203;Others-356085_CID-5776042:5899440_num=20	CCAACCCGAGACAAAAATACTGTTCGGAGAAAATGAAAACCAACTGGAGAAATTGTAATGAAAAATTTTCATTCAAGTTTTCTCTTGGGAACCTTTACTTTN98NAGGGCACACTCCGAGCACTTTACACACACACACACACACACACTCGTGGACACTTTGTGTTTGCGCTTTCGGCATGTGTGCAAGCATCAAACACGCATTGG	R1@R2@[1]GT:11:59:80@len=294;R1@R2@[1]GT:11:59:80@len=294	[1]GT:11	62	92	80	102	104
			HaeIII_Both-Ends_CC-163795_CID-56997:368729_num=171	CCAACCCGAGACAAAAATACTGTTCGGAGAAAATGAAAACCAACTGGAGAAATTGTAATGAAAAATTTTCATTCAAGTTTTCTCTTGGGAACCTTTACTTTN98NGGCACACTCCGAGCACTTTACACACACACACACACACACACACTCGTGGACACTTTGTGTTTGCGCTTTCGGCATGTGTGCAAGCATCAAACACGCATTGG	R1@R2@[1]GT:12:59:82@len=292	[1]GT:12	2	88	74	108	88
		A	HaeIII_Both-Ends_CC-319790_CID-56997:368798_num=40	CCAACCCGAGACAAAAATACTGTTCGGAGAAAATGAAAACCAACTGGAGAAATTGTAATGAAAAATTTTCATTCAAGTTTTCTCTTGGGAACCTTTACTTTN98NCATAAGGGCACACTCCGAGCACTTTACACACACACACACACACTCGTGGACACTTTGTGTTTGCGCTTTCGGCATGTGTGCAAGCATCAAACACGCATTGG	R1@R2@[1]GT:9:59:76@len=298	[1]GT:9	80	0	0	2	0
22.6652	2bp-STR-23		HaeIII_Both-Ends_CC-321993_CID-766405:1672730_num=39	CCACTTCAGTCTTCTAGAAATATGTATATATTTTATATATATATATATATATACACACTTTAATTAAATATAAATACAAAATAAATATATGTATATTTAATN98NGTGGGAAAGTGATAGAGAAGCGAATTGTCCAGCTACGGCAAAACCATCTGGTTATTACGATGGGTGAGCTGAGTACAACCTCTCATCAGCTTTTGAAAAGG	R1@[1]TA:10:34:53@R2@len=296	[1]TA:10	16	18	18	28	2
			HaeIII_Both-Ends_CC-327028_CID-766407:1672730_num=37	CCACTTCAGTCTTCTAGAAATATGTATATATTTTATATATATATATATATATATACACACTTTAATTAAATATAAATACAAAATAAATATATGTATATTTAN98NGTGGGAAAGTGATAGAGAAGCGAATTGTCCAGCTACGGCAAAACCATCTGGTTATTACGATGGGTGAGCTGAGTACAACCTCTCATCAGCTTTTGAAAAGG	R1@[1]TA:11:34:55@R2@len=294	[1]TA:11	22	24	20	0	8
23.6652	2bp-STR-24		HaeIII_Both-Ends_CC-327948_CID-2940172:3789921_num=37	CCCTTAATTCCATTCCTTCTCTATAAAGTTATTGGTGTAGCAGTTTTTGCTGGTGTCACTGTTGTTATCAGGTAGAAAGGGGCATAGACATGACATAAGCTN98NATAGAGAAAACAGACATTCAGCAAATGAACAAGGACTACAAAGGAAGGAGAAGACTCTGTGTGTGTTTGTATATATATATATATACACACATATATATAGG	R1@R2@[1]TA:8:17:32@len=300	[1]TA:8	0	20	36	22	2
			HaeIII_Both-Ends_CC-302862_CID-2940172:3789908_num=48	CCCTTAATTCCATTCCTTCTCTATAAAGTTATTGGTGTAGCAGTTTTTGCTGGTGTCACTGTTGTTATCAGGTAGAAAGGGGCATAGACATGACATAAGCTN98NAGAGAAAACAGACATTCAGCAAATGAACAAGGACTACAAAGGAAGGAGAAGACTCTGTGTGTGTTTGTATATATATATATATATACACACATATATATAGG	R1@R2@[1]TA:9:17:34@len=298	[1]TA:9	26	22	38	12	4
24.6652	2bp-STR-25	C	HaeIII_Both-Ends_CC-339273_CID-215164:2671122_num=33	CCAAGAATAACTTTGTAACATATGACTCCATCACCCACCTTGTTCATGCTATGTTTTTTGGGGGAGGTTTGTGTGTGTGTGTGTGTGTGTGCGCTCAAATCN98NCATTGATACTAGAGTTTGTGTGCCATGGTCCATAAGCATTAGTTGTTTTAGTTTCCAAAACTCACCACTCCTCTCCAGAAGCTAGTTATCAGTTCTTAGGG	R1@[1]TG:11:70:91@R2@len=294	[1]TG:11	0	0	66	0	2
			HaeIII_Both-Ends_CC-159940_CID-11933:2671122_num=177;Others-963503_CID-5803162:6862900_num=10	CCAAGAATAACTTTGTAACATATGACTCCATCACCCACCTTGTTCATGCTATGTTTTTTGGGGGAGGTTTGTGTGTGTGTGTGTGTGTGTGTGTGTGTGCGN98NCATTGATACTAGAGTTTGTGTGCCATGGTCCATAAGCATTAGTTGTTTTAGTTTCCAAAACTCACCACTCCTCTCCAGAAGCTAGTTATCAGTTCTTAGGG	R1@[1]TG:15:70:99@R2@len=286;R1@[1]TG:15:70:99@R2@len=286	[1]TG:15	62	100	68	96	44
25.6652	2bp-STR-26		HaeIII_Both-Ends_CC-346875_CID-698905:1841722_num=30	CCACTACTGTGTGTGTGTGTGTGTATATATATATATATATATATATATTTTCTTGTTTTCTTTTGGCAGCCACAATGAAAATCTTAAAAAAAAAAAAAAAAN98NTTCCGTAGCATAGCTGGAAGAGCACTCGTGTGGTTTGAGGGGGATGTGCATGCAGTCTCCTGCGTGTGGGAGGATTTCAGCCAACATCACAGGAGAGTGGG	R1@[1]TG:8:8:23@[2]TA:12:24:47@R2@len=292	[1]TG:8-[2]TA:12	2	0	20	10	30
			HaeIII_Both-Ends_CC-346876_CID-698904:1841722_num=30	CCACTACTGTGTGTGTGTGTGTGTATATATATATATATATATATATATATTTTCTTGTTTTCTTTTGGCAGCCACAATGAAAATCTTAAAAAAAAAAAAAAN98NTTCCGTAGCATAGCTGGAAGAGCACTCGTGTGGTTTGAGGGGGATGTGCATGCAGTCTCCTGCGTGTGGGAGGATTTCAGCCAACATCACAGGAGAGTGGG	R1@[1]TG:8:8:23@[2]TA:13:24:49@R2@len=290	[1]TG:8-[2]TA:13	10	12	2	20	12
26.6652	2bp-STR-27	C	HaeIII_Both-Ends_CC-365941_CID-216497:424974_num=25	CCAAGAATTTCAAACTCGCGGAGAAACCTGTCCAGAACACAAAAGTTGTTTGAACGGGGTGCAGAATTGTCACAGTAATTAGAGCAATCTCCGTTTACTGAN98NGATAAAGGGTTCAAATTCATCTTTCTCTCTCTGATTCACTTCTGATGAACTGCCTCTGTGTGTGTGTGTGTGTATATGAAGAAGTGTGTGTGTGTGTGTGG	R1@R2@[1]CA:8:2:17@[2]AC:8:29:44@len=300	[1]CA:8-[2]AC:8	0	0	60	0	0
			HaeIII_Both-Ends_CC-235000_CID-216497:424967_num=94	CCAAGAATTTCAAACTCGCGGAGAAACCTGTCCAGAACACAAAAGTTGTTTGAACGGGGTGCAGAATTGTCACAGTAATTAGAGCAATCTCCGTTTACTGAN98NTAAAGGGTTCAAATTCATCTTTCTCTCTCTGATTCACTTCTGATGAACTGCCTCTGTGTGTGTGTGTGTGTGTATATGAAGAAGTGTGTGTGTGTGTGTGG	R1@R2@[1]CA:8:2:17@[2]AC:9:29:46@len=298	[1]CA:8-[2]AC:9	30	52	64	38	14
27.6652	2bp-STR-28		HaeIII_Both-Ends_CC-373115_CID-3236725:4583515_num=23	CCGCGCTCCGCTCCTCTCCACTCCCGGCGGCTGAATCCCTGCCGGGTGCGAGAGTGTGTGTGTGTGTGTGTGTGTGTGCGTGAAGAGGGGAGGGGGGAGGAN98NGCCAGCGCAATCTCGGCTCATTTTCTCTAAGCAATGCAAGTTCACGGACGAGCTACCTAGCCAGCCCTCCTCTCCCGTCATGGACCTCCCAGGTAAAAAGG	R1@[1]GT:12:54:77@R2@len=292	[1]GT:12	20	16	4	4	4
			HaeIII_Both-Ends_CC-276081_CID-3236724:4583515_num=63	CCGCGCTCCGCTCCTCTCCACTCCCGGCGGCTGAATCCCTGCCGGGTGCGAGAGTGTGTGTGTGTGTGTGTGTGTGTGTGCGTGAAGAGGGGAGGGGGGAGN98NGCCAGCGCAATCTCGGCTCATTTTCTCTAAGCAATGCAAGTTCACGGACGAGCTACCTAGCCAGCCCTCCTCTCCCGTCATGGACCTCCCAGGTAAAAAGG	R1@[1]GT:13:54:79@R2@len=290	[1]GT:13	0	22	26	44	38
28.6652	2bp-STR-29		HaeIII_Both-Ends_CC-380223_CID-812075:4302168_num=21	CCAGAATAAAGCGGCAAAGCCAGGAGTACGCAAAACAAGAACCACCACAAGCCTGTCTCCTGATTTAGTGAACTGAAATAAGTTTGTATCTTAAACGTCACN98NATAACATGGAACTGACATCTTCTCTATTTACCACTGTACTCTTTCTGAGGATAATTTTAGACAAACATATATATATATATATATATTTGTTCTCTGGCAGG	R1@R2@[1]AT:10:16:35@len=296	[1]AT:10	16	2	0	0	22
			HaeIII_Both-Ends_CC-302067_CID-812075:4302159_num=48	CCAGAATAAAGCGGCAAAGCCAGGAGTACGCAAAACAAGAACCACCACAAGCCTGTCTCCTGATTTAGTGAACTGAAATAAGTTTGTATCTTAAACGTCACN98NCATGGAACTGACATCTTCTCTATTTACCTCTGTACTCTTTCTGAGGATAATTTTAGACAAACATATATATATATATATATATATATTTGTTCTCTGGCAGG	R1@R2@[1]AT:12:16:39@len=292	[1]AT:12	16	28	12	44	14
29.6652	2bp-STR-30		HaeIII_Both-Ends_CC-402698_CID-3077410:4177679_num=17	CCGAGATTCCCTGTCTCCGGTTTTCTAGGTGGGCTTTCCCATCTTCCCGTTCTTCCGTCCCCTTTCCAGAGCACGGATTATTTAAATAAAACTCTTAAAATN98NTATATATTTTTTTATATATATATATATATATATATATATATATATATATATATAAATATAATTTTTAGGGTATATATCTGTTAAAGTATATATTTTTCAGG	R1@R2@[1]TA:21:48:89@len=274	[1]TA:21	16	0	10	0	8
			HaeIII_Both-Ends_CC-361468_CID-3077410:4177677_num=26	CCGAGATTCCCTGTCTCCGGTTTTCTAGGTGGGCTTTCCCATCTTCCCGTTCTTCCGTCCCCTTTCCAGAGCACGGATTATTTAAATAAAACTCTTAAAATN98NTTTTTTTATATATATATATATATATATATATATATATATATATATATATATATAAATATAATTTTTAGGGTATATATCTGTTAAAGTATATATTTTTCAGG	R1@R2@[1]TA:24:48:95@len=268	[1]TA:24	6	14	14	16	6
30.6652	2bp-STR-31		HaeIII_Both-Ends_CC-458609_CID-3321841:4490947_num=10	CCGGACCAAGTGTCCTTCCTGACTGAGCCATACTGACACAGCTGGGTTTCCCAGTTTAGGAAGAAACGAGTATACACCTCAGGAAGGAGATGCTCATCCTCN98NTCCTTTTTTCAAAGAGAACAGCTAGGTATATATATATATATATATATATATATATATATATATATTAAAGAGATTTAGGGAGGTCTAAGCTCTGAACCAGG	R1@R2@[1]AT:19:37:74@len=278	[1]AT:19	0	10	0	6	4
			HaeIII_Both-Ends_CC-438370_CID-3321841:4490953_num=12	CCGGACCAAGTGTCCTTCCTGACTGAGCCATACTGACACAGCTGGGTTTCCCAGTTTAGGAAGAAACGAGTATACACCTCAGGAAGGAGATGCTCATCCTCN98NTTTCAAAGAGAACAGATAGAAATATATATATATATATATATATATATATATATATATATATATATTAAAGAGATTTAGGGAGGTCTAAGCTCTGAACCAGG	R1@R2@[1]AT:22:37:80@len=272	[1]AT:22	12	0	2	0	8
31.6652	2bp-STR-32		Others-898608_CID-1353214:5590237_num=11	GATCCCATCTCCAGTGCAGAAAAAAGTCACTGAGGTACCCTTCTTCCCTGTTTATCTTGAGAGATTGGTACTTACTGCTTAAATGCAGAAAAATGTTCTCGN98NTGTGTGTGTGTGTGTGTGTGTGTATGCTCATAGCTCACAGCAAAAGTGAGGAAGTTCATGTTAACTCAGTGTTAAGGGAAGAGGACTAAATTAATGCAAAT	R1@R2@[1]AC:11:79:100@len=294	[1]AC:11	4	0	10	0	8
			MboI_Both-Ends_GATC-119748_CID-507168:673315_num=23;Others-898607_CID-1353214:7953039_num=11	GATCATTTGCATTAATTTAGTCCTCTTCCCTTAACACTGAGTTAACATGAACTTCCTCACTTTTGCTGTGAGCTATGAGCATACACACACACACACACACAN98NCGAGAACATTTTTCTGCATTTAAGCAGTAAGTACCAATCTCTCAAGATAAACAGGGAAGAAGGGTACCTCAGTGACTTTTTTCTGCACTGGAGATGGGATC	R1@[1]AC:9:83:100@R2@len=298;R1@R2@[1]AC:9:83:100@len=298	[1]AC:9	8	14	12	14	20
32.6652	2bp-STR-33		MboI_Both-Ends_GATC-125946_CID-553203:954849_num=22	GATCCACAGGTGTCCTGCCTTCCAGTGTGAGTGTGTGTGTGTGTGTGTGTGTCCCGGGCCTATGCAGATGTAGCTGATGGATGCCATGCCAGGAGCAACACN98NCCCCTGGTAGCCCCTCATTGTGTGGTGTGTCGAGAGTACTGCCCACAGACACAGAAAGCTTTCAAGTAAATTTTGTCCTCCTCTTCCCTTCTTTCCCGATC	R1@[1]GT:11:31:52@R2@len=294	[1]GT:11	0	24	8	24	0
			MboI_Both-Ends_GATC-155924_CID-553208:954849_num=18	GATCCACAGGTGTCCTGCCTTCCAGTGTGAGTGTGTGTGTGTGTGTGTGTGTGTCCCGGGCCTATGCAGATGTAGCTGATGGATGCCATGCCAGGAGCAACN98NCCCCTGGTAGCCCCTCATTGTGTGGTGTGTCGAGAGTACTGCCCACAGACACAGAAAGCTTTCAAGTAAATTTTGTCCTCCTCTTCCCTTCTTTCCCGATC	R1@[1]GT:12:31:54@R2@len=292	[1]GT:12	16	0	12	0	20
33.6652	2bp-STR-34		MboI_Both-Ends_GATC-139183_CID-709238:1011625_num=20	GATCCTGAGAGTGAACAATAAAATGACGATTTCTCAGAAAACTGACCTATGAGGAAAGCAGTCGTGGACAAGCTTCAAGACAGAGGAACTGGAAAGGAACAN98NAGGAGAGTATTATTCCTGCACAAACTGGAAAAACCCAAAGGTTGCCGTATAGCAAACAAGGGGTTTTTTGGTGTGTGTGTGTGTGTTTTCTTTTTTAGATC	R1@R2@[1]AC:8:16:31@len=300	[1]AC:8	8	16	0	8	16
			MboI_Both-Ends_GATC-238277_CID-709238:1011624_num=10	GATCCTGAGAGTGAACAATAAAATGACGATTTCTCAGAAAACTGACCTATGAGGAAAGCAGTCGTGGACAAGCTTCAAGACAGAGGAACTGGAAAGGAACAN98NGAGAGTATTATTCCTGCACAAACTGGAAAAACCCAAAGGTTGCCGTATAGCAAACAAGGGGTTTTTTGGTGTGTGTGTGTGTGTGTTTTCTTTTTTAGATC	R1@R2@[1]AC:9:16:33@len=298	[1]AC:9	10	0	4	8	0
34.6652	2bp-STR-35		MboI_Both-Ends_GATC-203703_CID-538017:1142769_num=13	GATCCAAGCTGACTGAGACTGATGGGAAGACCCTCACTGATTTCAGTGCTGTTCAGAGCTGGCTCTCAGAAAAGTGACTTCTCAGCCAAGTGCCACATCACN98NAAAGCAGACGGAAAACTAAGAACAAAATAGGCACTTAGATGAAACTTCCTGGGGGGGCGGGAGGAAAGAGAGAGAGAGAGAGAGAGAACAACTGGGAGATC	R1@R2@[1]TC:10:15:34@len=296	[1]TC:10	8	4	10	0	12
			MboI_Both-Ends_GATC-164518_CID-538017:1142770_num=17	GATCCAAGCTGACTGAGACTGATGGGAAGACCCTCACTGATTTCAGTGCTGTTCAGAGCTGGCTCTCAGAAAAGTGACTTCTCAGCCAAGTGCCACATCACN98NGAAAAGCAGACGGAAAACTAAGAACAAAATAGGCACTTAGATGAAACTTCCTGGGGGGGCGGGAGGAAAGAGAGAGAGAGAGAGAGAACAACTGGGAGATC	R1@R2@[1]TC:9:15:32@len=298	[1]TC:9	0	10	0	12	16
35.6652	2bp-STR-36		MboI_Both-Ends_GATC-162301_CID-868093:1144110_num=17	GATCCTGGGGAACCTACTGATAGTGTTTCCTGATGACGCAGTTTATAGGTCAGACTCAAGTGCAGACAATGGAAGTGTTCATCGTTCCTCTTCTCCAGTGTN98NCACAATGTAGCAGAGCTTTCAGTGAGGTGGTCTTATGGTCAGACTGGTATGTTTTTTCGCTCTTCGTGTGTGTGTGTGTGTGTGTTTGGCTGGGGGAGATC	R1@R2@[1]AC:10:17:36@len=296	[1]AC:10	8	0	24	4	6
			MboI_Both-Ends_GATC-171133_CID-868093:1144112_num=16	GATCCTGGGGAACCTACTGATAGTGTTTCCTGATGACGCAGTTTATAGGTCAGACTCAAGTGCAGACAATGGAAGTGTTCATCGTTCCTCTTCTCCAGTGTN98NTACACACAATGTAGCAGAGCTTTCAGTGAGGTGGTCTTATGGTCAGACTGGTATGTTTTTTCGCTCTTCGTGTGTGTGTGTGTGTTTGGCTGGGGGAGATC	R1@R2@[1]AC:8:17:32@len=300	[1]AC:8	4	16	0	16	6
36.6652	2bp-STR-37		MboI_Both-Ends_GATC-193113_CID-515272:1303875_num=14	GATCATTTTTTCCTTAACATTTCAGCCTATATGTTGGCAATGGAGAGAGAGAGAGAGAGAGAGAGAGAGAGAGAGAGAGAGAGATTACAGTTGAGGAATAGN98NTCTGTTGTTATGGCAGCACTTCAGTATCTTGAACCCAAAACCCACAAATAAGCATCCGGAAGTCAAATACTTTATAAACTTATGCCAGACTGTTCCAGATC	R1@[1]GA:21:43:84@R2@len=274	[1]GA:21	4	2	0	10	12
			MboI_Both-Ends_GATC-227535_CID-515274:1303875_num=11	GATCATTTTTTCCTTAACATTTCAGCCTATATGTTGGCAATGGAGAGAGAGAGAGAGAGAGAGAGAGAGAGAGAGAGAGAGAGAGAGAGATTACAGGTGAGN98NTCTGTTGTTATGGCAGCACTTCAGTATCTTGAACCCAAAACCCACAAATAAGCATCCGGAAGTCAAATACTTTATAAACTTATGCCAGACTGTTCCAGATC	R1@[1]GA:24:43:90@R2@len=268	[1]GA:24	4	10	6	0	0
37.6652	2bp-STR-38		MboI_Both-Ends_GATC-203039_CID-607475:1450478_num=13	GATCCAGTCATGTTAGCAGACCTCCCACAAGCTGCTGTTTAATTTTCTCTTTGTTTTTTCTCTCTCTCTCTCTCTCTCTCTCCAGTGTGATAATGACAGGTN98NGTAAACCACGAGCTATTCTTAAGCCCCGGAGAGTCTGCGTCGGAGGCAAACGGAGGAAAGATGACATCAGTGTTGACAGTTTGGACTTTACTAAGAAGATC	R1@[1]TC:12:59:82@R2@len=292	[1]TC:12	8	12	4	2	8
			MboI_Both-Ends_GATC-203038_CID-607476:1450478_num=13	GATCCAGTCATGTTAGCAGACCTCCCACAAGCTGCTGTTTAATTTTCTCTTTGTTTTTTCTCTCTCTCTCTCTCTCTCTCTCTCCAGTGTGATAATGACAGN98NGTAAACCACGAGCTATTCTTAAGCCCCGGAGAGTCTGCGTCGGAGGCAAACGGAGGAAAGATGACATCAGTGTTGACAGTTTGGACTTTACTAAGAAGATC	R1@[1]TC:13:59:84@R2@len=290	[1]TC:13	0	10	10	8	12
38.6652	2bp-STR-39		MboI_Both-Ends_GATC-230440_CID-312866:487710_num=11	GATCAGCTGGCACTGCCTTCGTTGTGCCACGGCAGTCTCCCAGTTTATGCCTTATTCTCCTGCATTAGCATCGTGTGTGTGTGTGTGTGTGTGTTCATGTAN98NAATGCACTTCATCGTTTCAGTTCATTTTATCCAAGTGTTTTAAAAAGCTCTCCTCTTCTGTTTCCCCCGGTGAGGATGATTAAGATAGAATAGGAATGATC	R1@[1]GT:11:73:94@R2@len=294	[1]GT:11	10	0	12	0	10
			MboI_Both-Ends_GATC-53418_CID-309139:487710_num=38;Others-904075_CID-1299636:1324544_num=11	GATCAGCTGGCACTGCCTTCGTTGTGCCACGGCAGTCTCCCAGTTTATGCCTTATTCTCCTGCATTAGCATCGTGTGTGTGTGTGTGTGTGTGTGTGTGTGN98NAATGCACTTCATCGTTTCAGTTCATTTTATCCAAGTGTTTTAAAAAGCTCTCCTCTTCTGTTTCCCCCGGTGAGGATGATTAAGATAGAATAGGAATGATC	R1@[1]GT:14:73:100@R2@len=288;R1@[1]GT:14:73:100@R2@len=288	[1]GT:14	6	26	12	38	14
39.6652	2bp-STR-40		MboI_Both-Ends_GATC-37416_CID-754693:1001388_num=44;Others-893148_CID-1400837:8029356_num=11	GATCCGAAAAAGAGAGAGAGAGAGAGAGAGAGAGAAAGAGAGAGACTGGATGAAGTAGAGGAGGAGGGAGAGTTTGGAGTGGGGAGGGAGGGAGCGCGAGGN98NCCTCCAGCGTGTAACTGCCCTCGTCCTTCTTCTTCATCCGGTAGATGAGTAGCATGACCAGGAAGGCAGCGAAGAGAGCTCCCACCACGCCGCCCACGATC	R1@[1]AG:12:11:34@R2@len=292;R1@R2@[1]AG:12:11:34@len=292	[1]AG:12	20	14	8	48	20
			MboI_Both-Ends_GATC-212991_CID-754699:1001388_num=12	GATCCGAAAAAGAGAGAGAGAGAGAGAGAGAGAGAGAAAGAGAGAGACTGGATGAAGTAGAGGAGGAGGGAGAGTTTGGAGTGGGGAGGGAGGGAGCGCGAN98NCCTCCAGCGTGTAACTGCCCTCGTCCTTCTTCTTCATCCGGTAGATGAGTAGCATGACCAGGAAGGCAGCGAAGAGAGCTCCCACCACGCCGCCCACGATC	R1@[1]AG:13:11:36@R2@len=290	[1]AG:13	0	16	2	0	8
40.6652	2bp-STR-41		MboI_Both-Ends_GATC-55908_CID-470388:1502930_num=37	GATCATGTCTAGACCTGGTTTGCATCAAGGGCCAAACCGGATAAGCTGATTAGCCAATTAGAAATAGTTCAGCTAGTGGAGTAGAGGGACCAAAGAGAGCTN98NGACCCCCAAGTACAAAACCAGGAGATGAACAGAAGATGTTTTGTGTGTGTGTGTGTGTATGTGTGTTTTTTCTCTCTAGAACCTGACCAAGAAGAAAGATC	R1@R2@[1]AC:8:44:59@len=300	[1]AC:8	0	30	12	20	28
			MboI_Both-Ends_GATC-215912_CID-470388:1511098_num=12	GATCATGTCTAGACCTGGTTTGCATCAAGGGCCAAACCGGATAAGCTGATTAGCCAATTAGAAATAGTTCAGCTAGTGGAGTAGAGGGACCAAAGAGAGCTN98NCCCCCAAGTACAAAACCAGGAGATGAACAGAAGATGTTTTGTGTGTGTGTGTGTGTGTATGTGTGTTTTTTCTCTCTAGAACCTGACCAAGAAGAAAGATC	R1@R2@[1]AC:9:44:61@len=298	[1]AC:9	14	0	6	10	0
41.6652	2bp-STR-42		MboI_Both-Ends_GATC-56535_CID-287553:1285965_num=37	GATCAGCATAGCTTCAAAACAACCCAGCATATCCCTGAAGAAATGCTGCTTGACGAAGCTTCAAGAAACGACCTTGCAGCAGAAGCAAGCCTTGGCAGCCTN98NACCGGCCTCTCTCTCTCTCTCTCTCTGCTGTGCTGTATGTTTAATTATCAGTAGATGGCACTCATCACGCTGCAAGCGCAGGTCCATTCCATACGCAGATC	R1@R2@[1]AG:10:76:95@len=296	[1]AG:10	20	18	10	18	22
			MboI_Both-Ends_GATC-244236_CID-287553:1285966_num=10	GATCAGCATAGCTTCAAAACAACCCAGCATATCCCTGAAGAAATGCTGCTTGACGAAGCTTCAAGAAACGACCTTGCAGCAGAAGCAAGCCTTGGCAGCCTN98NCGGCCTCTCTCTCTCTCTCTCTCTCTGCTGTGCTGTATGTTTAATTATCAGTAGATGGCACTCATCACGCTGCAAGCGCAGGTCCATTCCATACGCAGATC	R1@R2@[1]AG:11:76:97@len=294	[1]AG:11	0	0	14	0	20
42.6652	2bp-STR-43		Others-241116_CID-1468107:4723539_num=25	GATCTTTCTTCTTGGTCAGGTTCTAGAGAGAAAAAACACACATACACACACACACACACAAAACATCTTCTGTTCATCTCCTGGTTTTGTACTTGGGGGTCN98NAGTTTCAGCTCTCTTTGGTCCCTCTACTCCACTAGCTGAACTATTTCTAATTGGCTAATCAGCTTATCCGGTTTGGCCCTTGATGCAAACCAGGTCTAGAC	R1@[1]AC:8:44:59@R2@len=300	[1]AC:8	0	12	4	20	14
			Others-426003_CID-4723539:8257694_num=18	GTCTAGACCTGGTTTGCATCAAGGGCCAAACCGGATAAGCTGATTAGCCAATTAGAAATAGTTCAGCTAGTGGAGTAGAGGGACCAAAGAGAGCTGAAACTN98NCCCCCAAGTACAAAACCAGGAGATGAACAGAAGATGTTTTGTGTGTGTGTGTGTGTGTATGTGTGTTTTTTCTCTCTAGAACCTGACCAAGAAGAAAGATC	R1@R2@[1]AC:9:44:61@len=298	[1]AC:9	16	0	6	14	0
43.6652	2bp-STR-44		Others-257405_CID-3254951:7934445_num=24	AGTGAGGCTGACAGCATAACTGCAGGCTAGCTCCAGGCTTGGCAGTCTGTGCAGCACCTGCAGGCGTAGGACCATAGCGTGCTCCATCAAGAGACAGGCTGN98NTGCACTCAAGACCTGGCCTGCTATGTAGACAAAAGCCTCAAAGTACTAGTGCACACACACACACACACTCTTGCCAGGAACCTGCTTGCCCTCAGATGATC	R1@R2@[1]GT:8:34:49@len=300	[1]GT:8	8	2	24	4	10
			Others-772415_CID-3254951:7934444_num=12	AGTGAGGCTGACAGCATAACTGCAGGCTAGCTCCAGGCTTGGCAGTCTGTGCAGCACCTGCAGGCGTAGGACCATAGCGTGCTCCATCAAGAGACAGGCTGN98NCACTCAAGACCTGGCCTGCTATGTAGACAAAAGCCTCAAAGTACTAGTGCACACACACACACACACACTCTTGCCAGGAACCTGCTTGCCCTCAGATGATC	R1@R2@[1]GT:9:34:51@len=298	[1]GT:9	2	8	0	12	2
44.6652	2bp-STR-45		Others-290227_CID-904106:7934445_num=22	AAGTGAGGCTGACAGCATAACTGCAGGCTAGCTCCAGGCTTGGCAGTCTGTGCAGCACCTGCAGGCGTAGGACCATAGCGTGCTCCATCAAGAGACAGGCTN98NTGCACTCAAGACCTGGCCTGCTATGTAGACAAAAGCCTCAAAGTACTAGTGCACACACACACACACACTCTTGCCAGGAACCTGCTTGCCCTCAGATGATC	R1@R2@[1]GT:8:34:49@len=300	[1]GT:8	12	4	18	2	8
			Others-730329_CID-904106:7934444_num=12	AAGTGAGGCTGACAGCATAACTGCAGGCTAGCTCCAGGCTTGGCAGTCTGTGCAGCACCTGCAGGCGTAGGACCATAGCGTGCTCCATCAAGAGACAGGCTN98NCACTCAAGACCTGGCCTGCTATGTAGACAAAAGCCTCAAAGTACTAGTGCACACACACACACACACACTCTTGCCAGGAACCTGCTTGCCCTCAGATGATC	R1@R2@[1]GT:9:34:51@len=298	[1]GT:9	4	0	0	14	6
45.6652	2bp-STR-46		Others-38584_CID-1296504:7791065_num=50	GATCAGCATAGCTTCAAAACAACCCAGCATATCCCTGAAGAAATGCTGCTTGACGAAGCTTCAAGAAACGACCTTGCAGCAGAAGCAAGCCTTGGCAGCCTN98NGGGTGAACCGGCCTCTCTCTCTCTCTCTCTCTGCTGTGCTGTATGTTTAATTATCAGTAGATGGCACTCATCACGCTGCAAGCGCAGGTCCATTCCATACG	R1@R2@[1]AG:10:70:89@len=296	[1]AG:10	16	18	14	36	16
			Others-904429_CID-1296504:11605718_num=11	GATCAGCATAGCTTCAAAACAACCCAGCATATCCCTGAAGAAATGCTGCTTGACGAAGCTTCAAGAAACGACCTTGCAGCAGAAGCAAGCCTTGGCAGCCTN98NGTGAACCGGCCTCTCTCTCTCTCTCTCTCTCTGCTGTGCTGTATGTTTAATTATCAGTAGATGGCACTCATCACGCTGCAAGCGCAGGTCCATTCCATACG	R1@R2@[1]AG:11:70:91@len=294	[1]AG:11	2	2	4	0	14
46.6652	2bp-STR-47		Others-45506_CID-24029:2442279_num=47	AAAAAAGAAAACACACACACACACACCAAAAAACCCCTTGTTTGCTATACGGCAACCTTTGGGTTTTTCCAGTTTGTGCAGGAATAATACTCTCCTGGGAGN98NTGTTCCTTTCCAGTTCCTCTGTCTTGAAGCTTGTCCACGACTGCTTTCCTCATAGGTCAGTTTTCTGAGAAATCGTCATTTTATTGTTCACTCTCAGGATC	R1@[1]AC:8:11:26@R2@len=300	[1]AC:8	18	22	10	18	26
			Others-431360_CID-24027:2442279_num=18	AAAAAAGAAAACACACACACACACACACCAAAAAACCCCTTGTTTGCTATACGGCAACCTTTGGGTTTTTCCAGTTTGTGCAGGAATAATACTCTCCTGGGN98NTGTTCCTTTCCAGTTCCTCTGTCTTGAAGCTTGTCCACGACTGCTTTCCTCATAGGTCAGTTTTCTGAGAAATCGTCATTTTATTGTTCACTCTCAGGATC	R1@[1]AC:9:11:28@R2@len=298	[1]AC:9	10	0	6	20	0
47.6652	2bp-STR-48		Others-617977_CID-5678207:7121302_num=14	CCAAAAGACACCTGACTAGCAAAAACAACTACTAACACTAACACTGCCACCCCCCTCACTCCAAAAAAAGCAAAAGGCACGGATACAGCCTTACACTCCACN98NAAGTCATCATTCCTCTATTTCTCCTGAGAGAATAGGTTTCGCATTATATATTCAAAGCTATGAATATATATATATATATATATCACAAAGTAATTTCTCTG	R1@R2@[1]AT:10:19:38@len=296	[1]AT:10	8	6	10	0	4
			Others-464027_CID-5678207:7121306_num=17	CCAAAAGACACCTGACTAGCAAAAACAACTACTAACACTAACACTGCCACCCCCCTCACTCCAAAAAAAGCAAAAGGCACGGATACAGCCTTACACTCCACN98NTTGCAAGTCATCATTCCTCTATTTCTCCTGAGAGAATAGGTTTCGCATTATATATTCAAAGCTATGAATATATATATATATATCACAAAGTAATTTCTCTG	R1@R2@[1]AT:8:19:34@len=300	[1]AT:8	6	6	0	14	6
48.6652	2bp-STR-49		Others-599274_CID-7966619:11174741_num=14	GATCCACAGGTGTCCTGCCTTCCAGTGTGAGTGTGTGTGTGTGTGTGTGTGTCCCGGGCCTATGCAGATGTAGCTGATGGATGCCATGCCAGGAGCAACACN98NCCAAACCCCTGGTAGCCCCTCATTGTGTGGTGTGTCGAGAGTACTGCCCACAGACACAGAAAGCTTTCAAGTAAATTTTGTCCTCCTCTTCCCTTCTTTCC	R1@[1]GT:11:31:52@R2@len=294	[1]GT:11	2	8	6	12	0
			Others-663867_CID-7966620:11174741_num=13	GATCCACAGGTGTCCTGCCTTCCAGTGTGAGTGTGTGTGTGTGTGTGTGTGTGTCCCGGGCCTATGCAGATGTAGCTGATGGATGCCATGCCAGGAGCAACN98NCCAAACCCCTGGTAGCCCCTCATTGTGTGGTGTGTCGAGAGTACTGCCCACAGACACAGAAAGCTTTCAAGTAAATTTTGTCCTCCTCTTCCCTTCTTTCC	R1@[1]GT:12:31:54@R2@len=292	[1]GT:12	4	0	6	0	16
49.6652	2bp-STR-50		Others-835889_CID-746218:15265302_num=11	ATCGGATTTTTGAGTTTTTTTTCTGGTAAAGATGTATTTGGGGAATGAAGGAAAACAGAAGGCCAGAGAAAATATGGGAAGACACCTCGGTGTCCACACTGN98NGAGTATAATTTGTGTGTGTGTGTGTGTGTGTGTGTGTGTGTGTAAAATGTTACTTTCATTACTGATAACGGCAATGGTACTTCTACAGCTCGGTTAGGATC	R1@R2@[1]AC:16:59:90@len=284	[1]AC:16	2	2	16	0	2
			Others-44182_CID-746218:8038732_num=47	ATCGGATTTTTGAGTTTTTTTTCTGGTAAAGATGTATTTGGGGAATGAAGGAAAACAGAAGGCCAGAGAAAATATGGGAAGACACCTCGGTGTCCACACTGN98NGTATAATTTGTGTGTGTGTGTGTGTGTGTGTGTGTGTGTGTGTAAAATGTTACTTTCATTACTGATAACGGCAATGGTACTTCTACAGCTCGGTTAGGATC	R1@R2@[1]AC:17:59:92@len=282	[1]AC:17	20	24	16	14	18
50.6652	2bp-STR-51		HaeIII_Both-Ends_CC-230102_CID-404351:2486791_num=98	CCACAACTTCTGAGGGATAACGAAGTCCTCTTATTACAGCTCCTACCATGTTTATTTTAATGGGGGTTTTGTGTGTGTGTGTGTGTGTGTGTGTATATATAN98NACTAAGGACACTCGGGCACAAAATGCAGCCTCCTGAGACTTGTGCACCCCAAGGACTACAAAGCAAAGCAGCTGGGTAAGGAGAAAATCTAGCAGAAGGGG	R1@[1]TG:12:70:93@R2@len=292	[1]TG:12	24	10	0	2	14
			Others-961762_CID-5930248:6797680_num=10	CCACAACTTCTGAGGGATAACGAAGTCCTCTTATTACAGCTCCTACCATGTTTATTTTAATGGGGGTTTTGTGTGTGTGTGTGTGTGTATATATATATATAN98NACTAAGGACACTCGGGCACAAAATGCAGCCTCCTGAGACTTGTGCACCCCAAGGACTACAAAGCAAAGCAGCTGGGTAAGGAGAAAATCTAGCAGAAGGGG	R1@[1]TG:9:70:87@R2@len=298	[1]TG:9	40	10	70	20	38
51.6652	3bp-STR-1		HaeIII_Both-Ends_CC-130759_CID-2723261:2871879_num=218;Others-607251_CID-6893274:6953681_num=14	CCCTCCAACGGCAGCTTCCAGTCGGCTCCTGCACCCAGTGCTGTCGGGAGCAAATGCTGCCGAGCCAGACAGAGCAGAACAGATCCCTGTGTGGCGGGACTN98NAGACCAGAGACTACCACTGCCCAGCAAGGAGGAGGAGGAGGAGGTGGAGAACAAGTCCTCCCCGATGTGACCGAGACCCAAGGGATGAGACAGCTCCAGGG	R1@R2@[1]CCT:6:58:75@len=297;R1@R2@[1]CCT:6:58:75@len=297	[1]CCT:6	54	90	198	90	32
			HaeIII_Both-Ends_CC-328058_CID-2723261:2871913_num=37	CCCTCCAACGGCAGCTTCCAGTCGGCTCCTGCACCCAGTGCTGTCGGGAGCAAATGCTGCCGAGCCAGACAGAGCAGAACAGATCCCTGTGTGGCGGGACTN98NCCAGAGACTACCACTGCCCAGCAAGGAGGAGGAGGAGGAGGAGGTGGAGAACAAGTCCTCCCCGATGTGACCGAGACCCAAGGGATGAGACAGCTCCAGGG	R1@R2@[1]CCT:7:58:78@len=294	[1]CCT:7	26	0	64	0	0
52.6652	3bp-STR-2		HaeIII_Both-Ends_CC-132185_CID-1955975:2601380_num=216	CCCAGGTGCACAGACCCTACCCAGCACCATTTCTCAGCTGTGGCAGAGAAGAGCTTCTCAGGAAGCAGCCACTGCATTAAGAGCCTTGCCATATCCTCCTGN98NCGGGCAGTGCAGGATACCTGCCCACTGCAGCAGGCATGCAGCCCAGCTTTGAGAGCCGTGACCCACACCACCACCACCACCACAACACAACGTGCCCCGGG	R1@R2@[1]GTG:6:19:36@len=297	[1]GTG:6	68	66	0	156	48
			HaeIII_Both-Ends_CC-151579_CID-1955975:2601701_num=188;Others-457490_CID-6592706:6838317_num=17	CCCAGGTGCACAGACCCTACCCAGCACCATTTCTCAGCTGTGGCAGAGAAGAGCTTCTCAGGAAGCAGCCACTGCATTAAGAGCCTTGCCATATCCTCCTGN98NGCAGTGCAGGATACCTACCCACTGCAGCAGGCATGCAGCCCAGCTTCGAGAGCCGTGACCCACACCACCACCACCACCACCACAACACAACCTGCCCCGGG	R1@R2@[1]GTG:7:19:39@len=294;R1@R2@[1]GTG:7:19:39@len=294	[1]GTG:7	74	90	158	0	82
53.6652	3bp-STR-3		HaeIII_Both-Ends_CC-132907_CID-1536323:3834058_num=215	CCATGCCAGAGAGGGTCAGGAGGGGCTGCAGAGCAGGCTCAGCTCATCCATCCCCCTCCTCACCCTGCGGCGAGGGGATGCTCTCTCCCCACTCGGCTCCCN98NGCGGCAGCCCAGCCATGCCGCCTTTCCTCCTCACTGCCTCCCCTCCTCCTCCTCCTCCTCCTCGCAGAAGAATCACAAGAGCTCTTGGGGTCTCCTTGAGG	R1@R2@[1]GAG:7:39:59@len=294	[1]GAG:7	2	116	134	128	78
			HaeIII_Both-Ends_CC-134944_CID-1536323:2094704_num=212	CCATGCCAGAGAGGGTCAGGAGGGGCTGCAGAGCAGGCTCAGCTCATCCATCCCCCTCCTCACCCTGCGGCGAGGGGATGCTCTCTCCCCACTCGGCTCCCN98NGCCCAGCCATGCCGCCTTTCCTCCTCACTGCCTCCCCTCCTCCTCCTCCTCCTCCTCCTCCTCGCAGAAGAATCACAAGAGCTCTTGGGGTCTCCTTGAGG	R1@R2@[1]GAG:9:39:65@len=288	[1]GAG:9	106	66	104	102	84
54.6652	3bp-STR-4		HaeIII_Both-Ends_CC-323490_CID-1868750:4445901_num=39	CCTAGAGATGACATTTATGGGTAAATCAGACTAACAGGCTGTTGTGGTTTAACCTGGCAGGCAGCTAAACACCACAGAGCCGTTTGTTCATTCCTCCCCTGN98NTAATAATAATAATAATAATAATAATAATAATAATAATAATAATAATAATAAACAAGTGAGGCACAATGCAATTGCTCACCACGCGCCAACCGATGCCCAGG	R1@R2@[1]TTA:17:51:101@len=264	[1]TTA:17	32	0	40	14	0
			HaeIII_Both-Ends_CC-147286_CID-1868750:2596556_num=194;Others-602605_CID-7757903:8382213_num=14	CCTAGAGATGACATTTATGGGTAAATCAGACTAACAGGCTGTTGTGGTTTAACCTGGCAGGCAGCTAAACACCACAGAGCCGTTTGTTCATTCCTCCCCTGN98NAAAAGGAAGGGAAAATAATAACAATAACAACAATAATAATAATAATAATAAACAAGTGAGGCACAATGCAATTGCTCACCACGCGCCAACCGATGCCCAGG	R1@R2@[1]TTA:6:51:68@len=297;R1@R2@[1]TTA:6:51:68@len=297	[1]TTA:6	64	144	0	82	126
55.6652	3bp-STR-5		HaeIII_Both-Ends_CC-313802_CID-2535465:2550372_num=43	CCCGCAGCCCCTCCACCTCCGCCCCGCCGCCGCCGCCGCCGCCGCCGCCGCCGTCCTCTTCGCCTCCTCCCACCGTATCCCAGACGTCCCGCGCCACGGCGN98NGCTTGCCGGAAATCCCGCAGAGCCACCTCGTAGCAGATCTCCTTCACCGCCTGCATCTTCAGGTCCGCCATGGTGACCCAGGGAGGATCCGGCGTCGCCGG	R1@[1]CCG:10:24:53@R2@len=285	[1]CCG:10	22	0	0	72	0
			HaeIII_Both-Ends_CC-153639_CID-2533653:2550372_num=185;Others-949705_CID-6818192:7466814_num=10	CCCGCAGCCCCTCCACCTCCGCCCCGCCGCCGCCGCCGCCGCCGCCGTCCTCTTCGCCTCCTCCCACCGTATCCCAGACGTCCCGCGCCACGGCGCGCCAGN98NGCTTGCCGGAAATCCCGCAGAGCCACCTCGTAGCAGATCTCCTTCACCGCCTGCATCTTCAGGTCCGCCATGGTGACCCAGGGAGGATCCGGCGTCGCCGG	R1@[1]CCG:8:24:47@R2@len=291;R1@[1]CCG:8:24:47@R2@len=291	[1]CCG:8	22	88	78	60	136
56.6652	3bp-STR-6		HaeIII_Both-Ends_CC-328148_CID-2548871:3225925_num=37	CCTGCCTGCCTGCGGGTCGTGGGGCAGGACGGGACGCGGAGGGCGGCTGCGGCAGTTGGGGACTGGCGCGCCGGCACGTAAGCGGGCGGGCGAGCGGGCGGN98NCAGCAGCAGCAGCAGCAGCAGCAGCAGCAGCAGCTGCTCCGGTTCGGCGGCGGAGTGAGCAGGCGCTGCTGCATGCACGCACGCACGCACGCGGCTCGCGG	R1@R2@[1]GCT:11:68:100@len=282	[1]GCT:11	18	0	0	0	56
			HaeIII_Both-Ends_CC-157382_CID-2548871:3188076_num=180	CCTGCCTGCCTGCGGGTCGTGGGGCAGGACGGGACGCGGAGGGCGGCTGCGGCAGTTGGGGACTGGCGCGCCGGCACGTAAGCGGGCGGGCGAGCGGGCGGN98NCGGCGGCGGCGGCAGCAGCAGCAGCAGCAGCAGCTGCTCCGGTTCGGCGGCGGAGTGAGCAGGCGCTGCTGCATGCACGCACGCACGCACGCGGCTCGCGG	R1@R2@[1]GCT:7:68:88@len=294	[1]GCT:7	0	118	74	126	72
57.6652	3bp-STR-7		HaeIII_Both-Ends_CC-158688_CID-531095:4391640_num=178;Others-760181_CID-5984483:8362123_num=12	CCACCACCTTACGCTGGGTGCTGCAGAGCCAGCCTCCACCCGGCGGCACTTGGGGCTACCTGGCTGTCAAGGTAAGAGCTGAATTTTGGAGGAGGGGAGAAN98NCGAATGCCCATCTCTGGGGAATTGCTGCTTTTTGAGAGGTGAGGGATGCTGACAGCCATCCCCACGACCCCTGTCCCTCCTCCTCCTCCTCCTCCTCCAGG	R1@R2@[1]GGA:7:4:24@len=294;R1@R2@[1]GGA:7:4:24@len=294	[1]GGA:7	62	62	150	102	0
			HaeIII_Both-Ends_CC-150519_CID-531095:4386162_num=189;Others-326022_CID-5984483:8362122_num=21	CCACCACCTTACGCTGGGTGCTGCAGAGCCAGCCTCCACCCGGCGGCACTTGGGGCTACCTGGCTGTCAAGGTAAGAGCTGAATTTTGGAGGAGGGGAGAAN98NATGCCCATCTCTGGGGAATTGCTGCTTTTTGAGAGGTGAGGGATGCTGACAGCCATCCCCACGACCCCTGTCCCTCCTCCTCCTCCTCCTCCTCCTCCAGG	R1@R2@[1]GGA:8:4:27@len=291;R1@R2@[1]GGA:8:4:27@len=291	[1]GGA:8	56	58	0	82	224
58.6652	3bp-STR-8		HaeIII_Both-Ends_CC-183515_CID-2583949:3625059_num=147	CCCGGCGGCGGCTCCCGCCTCACCTGTTCTTGAAGCGAACCATGGCGGCGGCGGCGGCGGCGCCCGATCCGGACGGACGTTGCGCCTAGCCAATGGGCGAGN98NCGGACTTGCCGGCGCCGCCCCGCCTTCCTCCCTCCGCCGGTTGCCGAGCCTGCGCGCGCGCGCTGCCGCCTTCCCGCCCTCTTCTGCCGGGGGCGACACGG	R1@[1]GGC:6:44:61@R2@len=297	[1]GGC:6	22	76	72	84	32
		E	HaeIII_Both-Ends_CC-415834_CID-2583945:3625059_num=15	CCCGGCGGCGGCTCCCGCCTCACCTGTTCTTGAAGCGAACCATGGCGGCGGCGGCGGCGGCGGCGCCCGATCCGGACGGACGGTGCGCCTAGCCAATGGGGN98NCGGACTTGCCGGCGCCGCCCCGCCTTCCTCCCTCCGCCGGTTGCCGAGCCTGCGCGCGCGCGCTGCCGCCTTCCCGCCCTCTTCTGCCGGGGGCGACACGG	R1@[1]GGC:7:44:64@R2@len=294	[1]GGC:7	0	0	0	0	24
59.6652	3bp-STR-9		HaeIII_Both-Ends_CC-189293_CID-3347777:3845924_num=140;Others-819003_CID-8309159:10440315_num=11	CCTGATTAAAGCCCAGCCTGGCAGAGATCACTTCCCTCCTGACAAAACCATGACATGGAGCTAAATGGGACAGGCACCAGCTGGGATGTGTGCTGTGGTCTN98NGGCAGCATGCTTACGCTAACCTTCGTGCTCAACCCGACCTCCTCCTCCTCCTCCTCCCCCGCCTGTCCCAGCTACTCAGCCGCAGCAGAGGGGATGTGAGG	R1@R2@[1]GGA:6:45:62@len=297;R1@R2@[1]GGA:6:45:62@len=297	[1]GGA:6	54	54	108	4	80
			HaeIII_Both-Ends_CC-198045_CID-3347777:3845919_num=130;Others-831443_CID-7850824:8309159_num=11	CCTGATTAAAGCCCAGCCTGGCAGAGATCACTTCCCTCCTGACAAAACCATGACATGGAGCTAAATGGGACAGGCACCAGCTGGGATGTGTGCTGTGGTCTN98NAGCATGCTTACGCTAACCTTCGTGCTCAACCCGACCTCCTCCTCCTCCTCCTCCTCCCCCGCCTGTCCCAGCTACTCAGCCGCAGCAGAGGGGATGTGAGG	R1@R2@[1]GGA:7:45:65@len=294;R1@[1]GGA:7:45:65@R2@len=294	[1]GGA:7	0	48	64	142	0
60.6652	3bp-STR-10		HaeIII_Both-Ends_CC-267261_CID-2453840:2605536_num=69	CCGCTGCAGCCCGCTCCGCTCCGCTCCGGGAGCGAGAGGCGCAGGGGGAGCCGCAGCCACAGTTGGCTCCTTCCTCCCTCTTCCCCCAAGTCATCATCACCN98NTTTAAAGCGATCGTGCGCACAACGCACCCTTGCCGGGTCGGTGTTCGTTCTCCTCCTCCTCCTCCTCCTCCTCCTCCTCGTCCCCCCGGTTCCCCCCCGGG	R1@R2@[1]GAG:10:23:52@len=285	[1]GAG:10	0	56	22	36	26
			HaeIII_Both-Ends_CC-220651_CID-2453840:2605538_num=107	CCGCTGCAGCCCGCTCCGCTCCGCTCCGGGAGCGAGAGGCGCAGGGGGAGCCGCAGCCACAGTTGGCTCCTTCCTCCCTCTTCCCCCAAGTCATCATCACCN98NTTTTTATTTAAAGCGATCGTGCGCACAACGCACCCTTGCCGGGTCGGTGTTCGTTCTCCTCCTCCTCCTCCTCCTCCTCGTCCCCCCGGTTCCCCCCCGGG	R1@R2@[1]GAG:8:23:46@len=291	[1]GAG:8	74	42	30	48	26
61.6652	3bp-STR-11		HaeIII_Both-Ends_CC-223809_CID-2729864:3611244_num=104	CCCTCCCATCCCACCTGTGATGGAGGGAGCTGGACCATGGACACCTATGGGAGCTGCAGCAAGGAACCCAGCTCTGCATTACTGTGGTGCTGGCTAAAGTCN98NTCTCCCGTGGGTACGTGAGTTCTCCTTCTTCCCTGCAAACCCTGGTGTGCTCCATCCTCCTCCTCCTCCTCCTCCTCCTCCTCCTCACCAGCCACCCACGG	R1@R2@[1]GAG:10:16:45@len=285	[1]GAG:10	28	52	40	46	56
			HaeIII_Both-Ends_CC-377816_CID-2729864:3611240_num=22	CCCTCCCATCCCACCTGTGATGGAGGGAGCTGGACCATGGACACCTATGGGAGCTGCAGCAAGGAACCCAGCTCTGCATTACTGTGGTGCTGGCTAAAGTCN98NCCCGTGGGTACGTGAGTTCTCCTTCTTCCCTGCAAACCCTGGTGTGCTCCATCCTCCTCCTCCTCCTCCTCCTCCTCCTCCTCCTCACCAGCCACCCACGG	R1@R2@[1]GAG:11:16:48@len=282	[1]GAG:11	24	0	0	0	28
62.6652	3bp-STR-12		HaeIII_Both-Ends_CC-226195_CID-1831682:3478896_num=102;Others-996788_CID-2016128:7530879_num=10	CCCACGGAGGGCGCAGCAGCAGAAGCACCAACCACCCCCGCCATGACAGACCGCTCGCTGCCTTCCCCGCCTCCCTCCATCTTTATACCCTCCGCTCCGCGN98NGTCGCCCCCCGCCCCGCACCGCTTCCTCCTGTGCTGGCGGCGGAGCGGAGCGGTACCGGTACCGGCACCGGCAGCAGCAGCAGCAGCAGCTCCGGTACCGG	R1@R2@[1]GCT:6:12:29@len=297;R1@R2@[1]GCT:6:12:29@len=297	[1]GCT:6	44	0	88	2	86
			HaeIII_Both-Ends_CC-128283_CID-1831682:3478909_num=222;Others-433308_CID-2016128:7530892_num=18	CCCACGGAGGGCGCAGCAGCAGAAGCACCAACCACCCCCGCCATGACAGACCGCTCGCTGCCTTCCCCGCCTCCCTCCATCTTTATACCCTCCGCTCCGCGN98NCCCCGCCCCGCACCGCTTCCTCCTGTGCTGGCGGCGGAGCGGAGCGGTACCGGTACCGGCACCGGCAGCAGCAGCAGCAGCAGCAGCAGCCCCGGTACCGG	R1@R2@[1]GCT:8:12:35@len=291;R1@R2@[1]GCT:8:12:35@len=291	[1]GCT:8	38	82	116	130	114
63.6652	3bp-STR-13		HaeIII_Both-Ends_CC-237876_CID-78286:4933486_num=91	CCAAAGATCTGAAAAGGTATACAGGTAAGAGGAGCTTCCTTGTAGCTTCCTCAGTGTTTCTTTTTTGGGAGTTCAGGATGTGCTTTTCCTCCAACCCTGCAN98NCTCCTGATGCATATTGCAACAGCCTTTCAAGGGGAATCTGTAGCTATGCAGAAGACACCCTACACCTGTAGAGTGCAAGAAGAAGAAGAAGAAAAAAAAGG	R1@R2@[1]TTC:5:9:23@len=300	[1]TTC:5	18	32	108	30	0
			HaeIII_Both-Ends_CC-306181_CID-78286:4929483_num=46	CCAAAGATCTGAAAAGGTATACAGGTAAGAGGAGCTTCCTTGTAGCTTCCTCAGTGTTTCTTTTTTGGGAGTTCAGGATGTGCTTTTCCTCCAACCCTGCAN98NATGCATATTGCAACAGCCTTTCAAGGGGAATCTGTAGCTATGCAGAAGACACCCTACACCTGTAGAGTGCAAGAAGAAGAAGAAGAAGAAGAAAAAAAAGG	R1@R2@[1]TTC:7:9:29@len=294	[1]TTC:7	24	24	0	18	30
64.6652	3bp-STR-14		HaeIII_Both-Ends_CC-244557_CID-2275741:3453186_num=86;Others-842437_CID-6724521:7518639_num=11	CCCCCGCCGCCCTCCTCGGGCTGGAGTTCGTATCAAAGCCCCCTTGTCTTGTTGTGACAGCTCTGATATTGTTTATTGAGGCTGGATGTCAGGTATAATTAN98NTGGGAGCCTGATGTTGATAAAGTTAAAGCGCCCGGGCGCCCTGCAGCATGAGCCCCTCGCCGCGCCGCCTCCTCCTCCTCCTCCGGCAGCAGCACCCCCGG	R1@R2@[1]GGA:5:18:32@len=300;R1@R2@[1]GGA:5:18:32@len=300	[1]GGA:5	0	58	48	2	84
			HaeIII_Both-Ends_CC-416291_CID-2275741:3462329_num=15	CCCCCGCCGCCCTCCTCGGGCTGGAGTTCGTATCAAAGCCCCCTTGTCTTGTTGTGACAGCTCTGATATTGTTTATTGAGGCTGGATGTCAGGTATAATTAN98NGAGCCTGATGTTGATAAAGTTAAAGCGCCCGGGCGCCCTGCAGCATGAGCCCCTCGCCGCGCCGCCTCCTCCTCCTCCTCCTCCGGCAGCAGCACCCCCGG	R1@R2@[1]GGA:6:18:35@len=297	[1]GGA:6	0	0	0	30	0
65.6652	3bp-STR-15		HaeIII_Both-Ends_CC-245320_CID-553379:2259378_num=85	CCACCATTAGCGGCGGCGGCGGGAGGAGCAGGAGCAGCAGCAGCAGCAGCAGCAGCCGCGGGGGTCTGCAGGCGGAGCGGAGCCCGGGTGCCGCCGCCGGCN98NGCCGGGGGCTCCCCCGGAGCCGGGGTGAGGTGAGTGGCGGAGCCGCCTTCTTGTCGGGTTTTTTGGGGGGGGCGGCGGTGGGAGAGCCGGCAGGCGGGGGG	R1@[1]AGC:8:33:56@R2@len=291	[1]AGC:8	14	46	86	0	26
			HaeIII_Both-Ends_CC-347084_CID-553380:2259378_num=30	CCACCATTAGCGGCGGCGGCGGGAGGAGCAGGAGCAGCAGCAGCAGCAGCAGCAGCAGCCGCGGGGGTCTGCAGGCGGAGCGGAGCCCGGGTACCGCCGCCN98NGCCGGGGGCTCCCCCGGAGCCGGGGTGAGGTGAGTGGCGGAGCCGCCTTCTTGTCGGGTTTTTTGGGGGGGGCGGCGGTGGGAGAGCCGGCAGGCGGGGGG	R1@[1]AGC:9:33:59@R2@len=288	[1]AGC:9	10	8	0	28	14
66.6652	3bp-STR-16		HaeIII_Both-Ends_CC-247123_CID-2113748:4048596_num=84	CCCCACCGCCCCGGGTACCGCCTGCCTCTCGGCGCAGCGCTTTGCAGCTTCCCCCCACCCCATCCTTTATTATTATTATTATTTTATTTATTTTTTTTAAGN98NCCCTTTTTTTTTTTTTTTTTTTTTTTTTTTGAGGAGATAAAAAGGCAAACAGAGAGCGCTCTGGCGCTGGCGAGGGGACTGTTTGCCTGCCTCCGCCGAGG	R1@[1]TTA:5:67:81@R2@len=300	[1]TTA:5	24	16	28	10	22
			HaeIII_Both-Ends_CC-342297_CID-2114578:4048596_num=32	CCCCACCGCCCCGGGTCCCGCCTGCCTCTCGGCGCAGCGCTTTGCAGCTTCCCCCCACCCCATCCTTTATTATTATTATTATTATTATTTTATTTATTTTTN98NCCCTTTTTTTTTTTTTTTTTTTTTTTTTTTGAGGAGATAAAAAGGCAAACAGAGAGCGCTCTGGCGCTGGCGAGGGGACTGTTTGCCTGCCTCCGCCGAGG	R1@[1]TTA:7:67:87@R2@len=294	[1]TTA:7	32	16	0	14	0
67.6652	3bp-STR-17		HaeIII_Both-Ends_CC-267349_CID-216820:484705_num=69	CCAAGACAGCAGCAGCAGCAGTGGGCAGAGGTGAGGGGCAGGGCTGTTGGCTAAACTACAATTTTCCTTGCCTTGTGCAGCTTGGTTTGAAAATATTAAAAN98NCTATCCTTCATCAAATAACTCTGTAATGGTTTTTTTGTTGTTGCTGTCCCACACAAAACAGTGGGACACCCGTATAATCATGGAGAGGGATTCACCTGTGG	R1@[1]CAG:5:7:21@R2@len=300	[1]CAG:5	60	0	0	0	88
			HaeIII_Both-Ends_CC-156712_CID-218229:484705_num=181;Others-762253_CID-5805324:5963754_num=12	CCAAGACAGCAGCAGCAGCAGCAGCAGTGGGCAGAGGTGAGGGGCAGGGCTGTTGGCTAAACTACAATTTTCCTTGCCTTGTGCAGCTTGGTTTGAAAATAN98NCTATCCTTCATCAAATAACTCTGTAATGGTTTTTTTGTTGTTGCTGTCCCACACAAAACAGTGGGACACCCGTATAATCATGGAGAGGGATTCACCTGTGG	R1@[1]CAG:7:7:27@R2@len=294;R1@[1]CAG:7:7:27@R2@len=294	[1]CAG:7	32	104	102	78	64
68.6652	3bp-STR-18		HaeIII_Both-Ends_CC-283125_CID-2026586:3965210_num=59	CCCATCCATACCCCCCCCAGCCCCAGTGTGTAAACGCTTGTTGCACCGAGGTGTTTTTTTTGTTTGTTTTTTTTTTTTAATAACGGTGCTTTGAGGGCGCAN98NCCTCACAGCGCCTCGGGCTGCGGGAGGGCTGAGCGGGGCGGCGGCGGCGGCGGCTGCTCCTCCCGCCCGCCCGAGCCCGGGGCGGGGAGGACGAGGGGAGG	R1@R2@[1]GCC:6:48:65@len=297	[1]GCC:6	18	38	26	18	32
			HaeIII_Both-Ends_CC-301271_CID-2026586:3965387_num=49	CCCATCCATACCCCCCCCAGCCCCAGTGTGTAAACGCTTGTTGCACCGAGGTGTTTTTTTTGTTTGTTTTTTTTTTTTAATAACGGTGCTTTGAGGGCGCAN98NAGCGCCTCGGGCTGCGGGAGGGCTGAGCGGGGCGGCGGCGGCGGCGGCGGCGGCTGCTCCTCCCGCCCGCCCGAGCCCGGGGCGGGGAGGACGAGGGGAGG	R1@R2@[1]GCC:8:48:71@len=291	[1]GCC:8	0	36	0	32	32
69.6652	3bp-STR-19		HaeIII_Both-Ends_CC-288302_CID-2166604:2252465_num=56	CCCCCGCTCCCAGTAAATCACCACAAGAGAAGGATGCGATTTTTAACTTTTCCAATAACTTTTATACTTCGCTGGTGTGGAGAGGTTTGGTCCGAACGATTN98NTCTCAAGTGGAATCGCAGCAGCTGCCGAGCGCTTTGCCGAGGTGAAGCGAGGCGCGGAGGACGGAACGAGAGCCCCGAGGGCGGCGGCGGCGGCGGGGGGG	R1@R2@[1]CCG:5:6:20@len=300	[1]CCG:5	26	40	0	28	26
			HaeIII_Both-Ends_CC-225055_CID-2114971:2166604_num=103;Others-842504_CID-6718451:6724984_num=11	CCCCCCCGCCGCCGCCGCCGCCGCCCTCGGGGCTCTCGTTCCGTCCTCCGCGCCTCGCTTCACCTCGGCAAAGCGCTCGGCAGCTGCTGCGATTCCACTTGN98NAATCGTTCGGACCAAACCTCTCCACACCAGCGAAGTATAAAAGTTATTGGAAAAGTTAAAAATCGCATCCTTCTCTTGTGGTGATTTACTGGGAGCGGGGG	R1@[1]CCG:6:6:23@R2@len=297;R1@[1]CCG:6:6:23@R2@len=297	[1]CCG:6	16	52	66	62	32
70.6652	3bp-STR-20		HaeIII_Both-Ends_CC-220561_CID-27937:1227095_num=107	CCAAAAGCCAGAGGGAATTTCCCTTCTCCTGGTGGGGCATGCTGAGTCACGCTCAGCTTTCTGGTCGTGACATCATCCACTTCTACAAAACAGAAGGAAAAN98NATCACGGGACAGGGGTGAGTCGCCTCCTCCTCCTCCTCCTCCTCCTCCTCCTCGGGGTCGGGGATCTCCTGCCAGCGAGCCCTTCTCCTGCGCAGACCTGG	R1@R2@[1]GAG:10:49:78@len=285	[1]GAG:10	0	86	50	86	0
			HaeIII_Both-Ends_CC-297132_CID-27937:1227096_num=51	CCAAAAGCCAGAGGGAATTTCCCTTCTCCTGGTGGGGCATGCTGAGTCACGCTCAGCTTTCTGGTCGTGACATCATCCACTTCTACAAAACAGAAGGAAAAN98NCCGATCACGGGACAGGGGTGAGTCGCCTCCTCCTCCTCCTCCTCCTCCTCCTCGGGGTCGGGGATCTCCTGCCAGCGAGCCCTTCTCCTGCGCAGACCTGG	R1@R2@[1]GAG:9:49:75@len=288	[1]GAG:9	26	6	56	2	22
71.8952	3bp-STR-21		HaeIII_Both-Ends_CC-334019_CID-1663954:3236559_num=35	CCATTGTATAACACCAAACCCCGCAGGATTCAACCCAAATATTGAAGCTGTGCGTGGTGCCAGGGTTTTAAAAAGTGTAAAAAAGCGAAATTTCAGGGGTTN98NTTCCTAGGACCCGGCGGCGCCGCTCCCCCGCCTCCGCCCCGCTCCGCTTCCCTCCCCGCCGCCGCCGCCGCCGCCGCCGCCGCCGCCGCCGGGGAGCGCGG	R1@R2@[1]CGG:12:11:46@len=279	[1]CGG:12	8	0	4	0	64
			HaeIII_Both-Ends_CC-305495_CID-1663954:3236563_num=47	CCATTGTATAACACCAAACCCCGCAGGATTCAACCCAAATATTGAAGCTGTGCGTGGTGCCAGGGTTTTAAAAAGTGTAAAAAAGCGAAATTTCAGGGGTTN98NCGGTTCCTAGGACCCGGCGGCGCCGCTCCCCCGCCTCCGCCCCGCTCCGCTTCCCTCCCCGCCGCCGCCGCCGCCGCCGCCGCCGCCGCCGGGGAGCGCGG	R1@R2@[1]CGG:11:11:43@len=282	[1]CGG:11	12	46	0	42	0
			HaeIII_Both-Ends_CC-244774_CID-1663954:3236554_num=86	CCATTGTATAACACCAAACCCCGCAGGATTCAACCCAAATATTGAAGCTGTGCGTGGTGCCAGGGTTTTAAAAAGTGTAAAAAAGCGAAATTTCAGGGGTTN98NCTAGGCCCCGGCGGCGCCGCCCCCCCGCCTCCGCCCCGCTCCGCTTCCCTCCCCGCCGCCGCCGCCGCCGCCGCCGCCGCCGCCGCCGCCGGGGAGCGCGG	R1@R2@[1]CGG:13:11:49@len=276	[1]CGG:13	0	24	52	42	70
72.9542	3bp-STR-22		HaeIII_Both-Ends_CC-306861_CID-334862:2175413_num=46	CCAAGTTCCTCAGAAGGTCTTTGGTGTCTGATGCTGGCTGAAATCACCTTAAAATCAGCAACCTTAATATCTCCAAGGACCTCAGCCTTATCATGATGAAAN98NAGTAGCAGAAACCAGTAGGGTAATTCAGGATGTTGTTTTTATTATTTATTATTATTATTATTATTATTATTATTATTATTATTATTATTATTATTATGGGG	R1@R2@[1]ATA:17:5:55@len=264	[1]ATA:17	0	2	32	66	0
			HaeIII_Both-Ends_CC-240697_CID-334862:2175414_num=89	CCAAGTTCCTCAGAAGGTCTTTGGTGTCTGATGCTGGCTGAAATCACCTTAAAATCAGCAACCTTAATATCTCCAAGGACCTCAGCCTTATCATGATGAAAN98NAGAAACCAGTAGGGTAATTCAGGATGTTGTTTTTATTATTTATTATTATTATTATTATTATTATTATTATTATTATTATTATTATTATTATTATTATGGGG	R1@R2@[1]ATA:19:5:61@len=258	[1]ATA:19	64	52	38	0	38
73.9542	3bp-STR-23		HaeIII_Both-Ends_CC-306938_CID-3129742:3174457_num=46	CCGATGGAGCCGCGGCGGCGGCGGCGGCGGCGGCGGCAGCAGCAGCAGCAGCAGCAGCAGCGTGCTTCAGCGAGGATGATTTTTACTGTCCCGTCTGCCAGN98NCCCCCCCCTCCCGCCTCCCCTTCGCCAGCCTTTTCCTCGCCGCCGCCCGTTCGCTGCCTTTCACCGCTCTGCCCCCCGCGCCCCAGCGCACGGACCCGCGG	R1@[1]GCG:8:12:35@[2]GCA:8:36:59@R2@len=282	[1]GCG:8-[2]GCA:8	12	4	4	70	2
			HaeIII_Both-Ends_CC-155863_CID-3129845:3174457_num=182	CCGATGGAGCCGCGGCGGCGGCGGCGGCGGCGGCGGCAGCAGCAGCAGCAGCAGCAGCAGCAGCGTGCTTCAGCGAGGATGATTTTTACTGTCCCGTCTGCN98NCCCCCCCCTCCCGCCTCCCCTTCGCCAGCCTTTTCCTCGCCGCCGCCCGTTCGCTGCCTTTCACCGCTCTGCCCCCCGCGCCCCAGCGCACGGACCCGCGG	R1@[1]GCG:8:12:35@[2]GCA:9:36:62@R2@len=279	[1]GCG:8-[2]GCA:9	18	130	78	78	88
74.9542	3bp-STR-24		HaeIII_Both-Ends_CC-307843_CID-1339308:1795050_num=46	CCAGTTTATCAGTAATCAAAGTTAAGTTAGGAAGACCTACATATATCAATGTCTCTATCAGACTTCCTGTAGATTTTTTTTTCCCATTACAAGGTTCCTGCN98NTGTAGGTGTATATGTCTACATGTAAATACATGTGTGTATATATGCACATGCAGATGGTGGAAACCTCCTCCTCCTCCTCCTCCTGAAGCGGCACGTGTGGG	R1@R2@[1]AGG:7:18:38@len=294	[1]AGG:7	20	22	0	28	30
			HaeIII_Both-Ends_CC-316728_CID-1339308:1795049_num=42	CCAGTTTATCAGTAATCAAAGTTAAGTTAGGAAGACCTACATATATCAATGTCTCTATCAGACTTCCTGTAGATTTTTTTTTCCCATTACAAGGTTCCTGCN98NAGGTGTATATGTCTACATGTAAATACATGTGTGTATATATGCACATGCAGATGGTGGAAACCTCCTCCTCCTCCTCCTCCTCCTGAAGCGGCACGTGTGGG	R1@R2@[1]AGG:8:18:41@len=291	[1]AGG:8	6	18	28	16	26
75.9542	3bp-STR-25		HaeIII_Both-Ends_CC-315112_CID-586095:3550117_num=42	CCACCGAGGAGCGGGTACCGGTGCCCTTCGGGGTGCACCGGGAAGCGGCTCAGGGAGCACCGGAGCAGATCCCGGCAGAGCAGCAGTGCCCGGTGCCCGTGN98NGCCTCCCCGCTGCCCCCCACGGTGGAGGAGGAGGAGGAGGAGGAGGGCGACAGCGATGGCTCAGAGCCGGAAGGCAGCTGCGATGAGGAGGATGGCGACGG	R1@R2@[1]CCT:7:56:76@len=294	[1]CCT:7	2	20	38	18	14
			HaeIII_Both-Ends_CC-428029_CID-586095:3550116_num=13	CCACCGAGGAGCGGGTACCGGTGCCCTTCGGGGTGCACCGGGAAGCGGCTCAGGGAGCACCGGAGCAGATCCCGGCAGAGCAGCAGTGCCCGGTGCCCGTGN98NCCGCTGCCCCCCACGGTGGAGGAGGAGGAGGAGGAGGAGGAGGAGGGCGACAGCGATGGCTCAGAGCCGGAAGGCAGCTGCGATGAGGAGGATGGCGACGG	R1@R2@[1]CCT:9:56:82@len=288	[1]CCT:9	2	0	28	0	0
76.9542	3bp-STR-26		HaeIII_Both-Ends_CC-390718_CID-436879:743234_num=19	CCACACCTGGAGCACGCAAACACCCTGCCCAGGAGGAGGAGGAGGAGGAGGAGGAGGAGGAGAGGCTGGCGTCCCTCCAGGTTTCTCTCAGCCCCAGTGACN98NGCGGAGAGAGAACCTACCCAGTGAACCGGCACCAGCCTCGGGGCAGGGGCGAGATTGCACCGGGGACTGCCGGATCCGGCTTGCTGCCGCAGCAGCAGTGG	R1@[1]AGG:10:31:60@R2@len=285	[1]AGG:10	0	0	28	14	0
			HaeIII_Both-Ends_CC-315309_CID-436877:743234_num=42	CCACACCTGGAGCACGCAAACACCCTGCCCAGGAGGAGGAGGAGGAGGAGGAGGAGCGGCTGGCGTCCCTCCAGGTTTCTCTCAGCCCCAGTGACCTTCTGN98NGCGGAGAGAGAACCTACCCAGTGAACCGGCACCAGCCTCGGGGCAGGGGCGAGATTGCACCGGGGACTGCCGGATCCGGCTTGCTGCCGCAGCAGCAGTGG	R1@[1]AGG:8:31:54@R2@len=291	[1]AGG:8	8	18	44	12	12
77.9542	3bp-STR-27	A	HaeIII_Both-Ends_CC-329337_CID-940577:2383521_num=36	CCAGCAGATGCAAGCGAGAACAGGTTTAAGAAGAGAGAACTCACCGCGCCACTTCCCTGTTCCCTGGTGAATCAACCTCCTCCTCCTCCTCCCCGCTCTCCN98NTTTGCTACGCCAAGCCAAAGTGTGTGTGACAAGGACAGAAACCCCCCACTGTGCCCGAGGAGCGGCGCGGCGCGGCACACCGCGGGACCTCAAGGACGCGG	R1@[1]CCT:5:76:90@R2@len=300	[1]CCT:5	70	2	0	2	2
			HaeIII_Both-Ends_CC-83394_CID-802524:2383521_num=299;Others-157152_CID-6144665:7333180_num=30	CCAGCAGATGCAAGCGAGAACAGGTTTAAGAAGAGAGAACTCACCGCGCCACTTCCCTGTTCCCTGGTGAATCAACCTCCTCCTCCTCCTCCTCCCCGCTCN98NTTTGCTACGCCAAGCCAAAGTGTGTGTGACAAGGACAGAAACCCCCCACTGTGCCCGAGGAGCGGCGCGGCGCGGCACACCGCGGGACCTCAAGGACGCGG	R1@[1]CCT:6:76:93@R2@len=297;R1@[1]CCT:6:76:93@R2@len=297	[1]CCT:6	60	134	104	186	160
78.9542	3bp-STR-28		HaeIII_Both-Ends_CC-333660_CID-2226941:2322240_num=35	CCCCCATGATTTATTCAGCAGTGGATCGGGGCACGCAATCGGGCTGTCAGGAGAGCGTCAGCTTATTAGGCAAGTTCTGCGTGATTCCAGGAGAGGGTCTAN98NCGAGAGGAAGGGACGCCGGGCCCCGCCGAGCCCCGCCGCGCCCCGCCGCCTGCCCTGCCCTGCCGCCGCCGCCGCCGCCGCCGCCCCAGGTAGGTGCGGGG	R1@R2@[1]GGC:8:17:40@len=291	[1]GGC:8	4	40	24	0	4
			HaeIII_Both-Ends_CC-305202_CID-2226941:2322245_num=47	CCCCCATGATTTATTCAGCAGTGGATCGGGGCACGCAATCGGGCTGTCAGGAGAGCGTCAGCTTATTAGGCAAGTTCTGCGTGATTCCAGGAGAGGGTCTAN98NGAGGAAGGGACGCGGGGCACCGCCGAGCCCCGCCGCGCCCCGCCGCCTGCCCTGCCCTGCCGCCGCCGCCGCCGCCGCCGCCGCCCCAGGTAGGTGCGGGG	R1@R2@[1]GGC:9:17:43@len=288	[1]GGC:9	4	24	18	54	64
79.9542	3bp-STR-29		HaeIII_Both-Ends_CC-335820_CID-3217232:3266190_num=34	CCGCCTCGCTGCCCTTCCGGACTCACTTTCAGCAGCAGCAGCAGCAGCAGCAGCAGCAGCAGCAGCAGCAGCCACCTGCGCTCCCCTACCCCAAGCTGCAGN98NTCCCTGCCTCCTCCACCTACTCCTCGGTGCCGGGGGGCAGCCAGCCAGCACACTCCTACAAGAGCTGCACGGCACCGTCGGGGCAGCCACCGCTGGAGCGG	R1@[1]CAG:14:30:71@R2@len=273	[1]CAG:14	0	28	16	0	24
			HaeIII_Both-Ends_CC-268513_CID-3217224:3266190_num=68	CCGCCTCGCTGCCCTTCCGGACTCACTTTCAGCAGCAGCAGCAGCAGCAGCAGCAGCAGCAGCAGCAGCAGCAGCAGCCACCTGCGCTCCCCTACCCCAAGN98NTCCCTGCCTCCTCCACCTACTCCTCGGTGCCGGGGGGCAGCCAGCCAGCACACTCCTACAAGAGCTGCACGGCACCGTCGGGGCAGCCACCGCTGGAGCGG	R1@[1]CAG:16:30:77@R2@len=267	[1]CAG:16	32	16	6	52	30
80.9542	3bp-STR-30		HaeIII_Both-Ends_CC-339144_CID-2360960:3231483_num=33	CCCCGGCGATGGCGGAACGCTGGCGGCAGCCCTGCCCGGAAGTCACGTGACGGCGGCGGCGGCGGGGTCCCCCCCGCCCCCCTCCCCCCCCCCCCAAGATGN98NGTTTTAGGAACGGCGCAGTGTTTAAAAAAACCCTCGGAGGCGAACGGGCTTGTTTTGTGATGCCGAATACAAAACGCGTGTGGGAGCTGAGCTCGGCGCGG	R1@[1]CGG:5:51:65@R2@len=300	[1]CGG:5	0	18	2	4	12
			HaeIII_Both-Ends_CC-409578_CID-2360959:3231483_num=16	CCCCGGCGATGGCGGAACGCTGGCGGCAGCCCTGCCCGGAAGTCACGTGACGGCGGCGGCGGCGGCGGCGGGGTCCCCCCCGCCCCCCTCCCCCCCCCCCCN98NGTTTTAGGAACGGCGCAGTGTTTAAAAAAACCCTCGGAGGCGAACGGGCTTGTTTTGTGATGCCGAATACAAAACGCGTGTGGGAGCTGAGCTCGGCGCGG	R1@[1]CGG:7:51:71@R2@len=294	[1]CGG:7	0	0	8	18	0
81.9542	3bp-STR-31	A	HaeIII_Both-Ends_CC-356131_CID-1168926:3371684_num=28	CCAGGGACGGCGAGGCGGTGAGGGCGGAGGGGCTACGAGGCGAGGCTCCGCGCCGGCTTCTTCTTCTTCTCCTCCTCCTCCTCCTCGCCGCCGCCGCCTCCN98NTATATATATATGTAAGCGTTTCCCTCTCTCTCTCGAGCCCGCCGGGGGAGGCGGCGCCGAAATGGAAAGCAAAAGCGGGGCTGGGGGCGCGGCGCCGCCGG	R1@[1]CTC:6:69:86@R2@len=297	[1]CTC:6	58	0	0	0	0
			HaeIII_Both-Ends_CC-159951_CID-1168925:3371684_num=177	CCAGGGACGGCGAGGCGGTGAGGGCGGAGGGGCTACGAGGCGAGGCTCCGCGCCGGCTTCTTCTTCTTCTCCTCCTCCTCCTCCTCCTCCTCGCCGCCGCCN98NTATATATATATGTAAGCGTTTCCCTCTCTCTCTCGAGCCCGCCGGGGGAGGCGGCGCCGAAATGGAAAGCAAAAGCGGGGCTGGGGGCGCGGCGCCGCCGG	R1@[1]CTC:8:69:92@R2@len=291	[1]CTC:8	36	84	46	112	88
82.9542	3bp-STR-32		HaeIII_Both-Ends_CC-361857_CID-2539641:3271946_num=26	CCCGCCACACACACCGGGGGGCGGGCAACGCCCTCCCCTCTCCTCACAGACAGACCGACCGACACCGTCCCTCCCCCCACGGACAGACGGACGTCGCCCCCN98NGCGGACGGACGCCGCCCCTCCCCCCCGCGGTACCAGACACTCGGCGGCGGCGGCGGCTGGGCACGCAGAGGGCGCGCGGGGTCGGGCGGGCGAGCGAGCGG	R1@R2@[1]GCC:5:45:59@len=300	[1]GCC:5	10	14	12	12	4
			HaeIII_Both-Ends_CC-460401_CID-2539641:3271947_num=10	CCCGCCACACACACCGGGGGGCGGGCAACGCCCTCCCCTCTCCTCACAGACAGACCGACCGACACCGTCCCTCCCCCCACGGACAGACGGACGTCGCCCCCN98NGGCCGCCGCCCCTCCCCCCCGCGGTCCCAGACACTCGGCGGCGGCGGCGGCGGCGGCTGGGCACGCAGAGGGCGCGCGGGGTCGGGCGGGCGAGCGAGCGG	R1@R2@[1]GCC:7:45:65@len=294	[1]GCC:7	0	8	12	8	4
83.9542	3bp-STR-33		HaeIII_Both-Ends_CC-366033_CID-2051421:2844309_num=25	CCCATGGCGGGGGGGGCGGGGAGGGCGGCGGGCTTCCCTCTGCCGTGCGCTGGGTGCGTGTGCGCTGCGTGTGCGAGTGCGAGTGTGAATGGAGGGCGGCGN98NGCTGCGCGCCTTCCTCCGCCTCCTCCTCCTCCTCCTCCGCCGCCGCCGCCGCCGCCTCCCCGTGTCCTCGCGGCTCCGCCACCGCCGCCGGGCGCGCAGGG	R1@R2@[1]GGC:6:46:63@[2]GGA:6:64:81@len=294	[1]GGC:6-[2]GGA:6	16	12	0	0	26
			HaeIII_Both-Ends_CC-339336_CID-2051421:2843529_num=33	CCCATGGCGGGGGGGGCGGGGAGGGCGGCGGGCTTCCCTCTGCCGTGCGCTGGGTGCGTGTGCGCTGCGTGTGCGAGTGCGAGTGTGAATGGAGGGCGGCGN98NGCGCGCCTTCCTCCGCCTCCTCCTCCTCCTCCTCCGCCGCCGCCGCCGCCGCCGCCTCCCCGTGTCCTCGCGGCTCCGCCACCGCCGCCGGGCGCGCAGGG	R1@R2@[1]GGC:7:46:66@[2]GGA:6:67:84@len=291	[1]GGC:7-[2]GGA:6	0	16	10	32	12
84.9542	3bp-STR-34		HaeIII_Both-Ends_CC-378637_CID-1844382:3376663_num=22	CCCACTGCCTCCCATTTCCAGTGCCTCAGGAAGCAGCACCGGGAGGAGGAGGAGGAGGAAGAGGAGGAAGAGGAGGAGGAGGGGGGGGGGGGGGAGGTTAAN98NGCTGTGGGCAGCCCCCGCCTCCCCTGCGCACCCACCCCCAACGGCGCCCGCAGGCTCGGGCAGGAGCGGGGTGTCGCCTCCCCGTCCCACCCCCACGCCGG	R1@[1]GGA:6:42:59@R2@len=297	[1]GGA:6	0	8	16	4	0
			HaeIII_Both-Ends_CC-398444_CID-1844381:3376663_num=18	CCCACTGCCTCCCATTTCCAGTGCCTCAGGAAGCAGCACCGGGAGGAGGAGGAGGAGGAAGAGGAGGAAGAGGAGGAGGAGGAGGAGGAGGGGGGGGGGGGN98NGCTGTGGGCAGCCCCCGCCTCCCCTGCGCACCCACCCCCAACGGCGCCCGCAGGCTCGGGCAGGAGCGGGGTGTCGCCTCCCCGTCCCACCCCCACGCCGG	R1@[1]GGA:6:42:59@[2]GAG:7:70:90@R2@len=291	[1]GGA:6-[2]GAG:7	4	6	0	16	8
85.9542	3bp-STR-35		HaeIII_Both-Ends_CC-386448_CID-3358923:4837690_num=20	CCGGCAGGCAGGCACCAGGGCTCACCTTCCATAAGGCAGTTGAGGTAAGCAGCCTGGAGGCTGTTCCCGTTGACCAGCGCCATCGCCTCGTGCTTGGCGGAN98NCTTCCCCTCGTCGTCGTCGTCGTCTGAGTCCACCAGCACCAAGACATCACCCGAGTCCTGATTCCTGTGAAGAGCAGAGCAAGCGGAGGTGGGCTGAAAGG	R1@R2@[1]GAC:5:78:92@len=300	[1]GAC:5	14	0	0	22	8
			HaeIII_Both-Ends_CC-267125_CID-2951037:3358923_num=69	CCTTTCAGCCCACCTCCGCTTGCTCTGCTCTTCACAGGAATCAGGACTCGGGTGATGTCTTGGTGCTGGTGGACTCAGACGACGACGACGACGACGAGGGGN98NTCCGCCAAGCACGAGGCGATGGCGCTGGTCAACGGGAACAGCCTCCAGGCTGCTTACCTCAACTGCCTTATGGAAGGTGAGCCCTGGTGCCTGCCTGCCGG	R1@[1]GAC:6:78:95@R2@len=297	[1]GAC:6	0	54	72	18	0
86.9542	3bp-STR-36		HaeIII_Both-Ends_CC-391376_CID-3456705:3660053_num=19	CCGGGGGGCTGCTGCTCTGGGACTGGCTGGGCTTCGGTCAGCAGGTGGTGAGCAATTGCATAGTGCATCGCTTATTTTGTATATTCTTATTCTTATTATTAN98NGTTGTTGTTGTTGTTATTATTATTATTATTATTATTATTATTATTATTATTATTATTATTATTATTATTATTTCCCCTTCCTTTTCTGTCCTATTAAACGG	R1@R2@[1]AAT:19:30:86@[2]AAC:5:87:101@len=258	[1]AAT:19-[2]AAC:5	18	0	0	8	12
			HaeIII_Both-Ends_CC-429641_CID-3456705:3660054_num=13	CCGGGGGGCTGCTGCTCTGGGACTGGCTGGGCTTCGGTCAGCAGGTGGTGAGCAATTGCATAGTGCATCGCTTATTTTGTATATTCTTATTCTTATTATTAN98NATTATTATTATTATTATTATTATTATTATTATTATTATTATTATTATTATTATTATTATTATTATTATTATTTCCCCTTCCTTTTCTGTCCTATTAAACGG	R1@R2@[1]AAT:24:30:101@len=243	[1]AAT:24	0	8	0	20	0
87.9542	3bp-STR-37		HaeIII_Both-Ends_CC-396848_CID-3197662:3327531_num=18	CCGCCCCGCTTGCCATTACCGGTTAGACCGGGGGTCCCGGGTGCTGGCGCCTTCCGCAGAGGTTTTCCACGAATACAACAAACCAGCGGCGGTCTCTTAGGN98NCCCGTCCGTGTCCGAGCGGGGCGCCTGGCGGCGGCGGCGGCGTCTCCTCAGAGGCAGGCGGCTGGAGCGGGGGGACCCTTCCCGCCGCCGCGCGTCTCCGG	R1@R2@[1]CGC:5:60:74@len=300	[1]CGC:5	4	0	16	0	16
			HaeIII_Both-Ends_CC-347879_CID-3197662:3327532_num=30	CCGCCCCGCTTGCCATTACCGGTTAGACCGGGGGTCCCGGGTGCTGGCGCCTTCCGCAGAGGTTTTCCACGAATACAACAAACCAGCGGCGGTCTCTTAGGN98NCGTGTCCGAGCGGGGCGCCTGGCGGCGGCGGCGGCGGCGGCGTCTCCTCAGAGGCAGGCGGCTGGAGCGGGGGGACCCTTCCCGCCGCCGCGCGTCTCCGG	R1@R2@[1]CGC:7:60:80@len=294	[1]CGC:7	0	22	12	30	0
88.9542	3bp-STR-38	A	HaeIII_Both-Ends_CC-398482_CID-1817090:3310787_num=18	CCCACCCGTGTGGGTCAGAGCCCGCGCCCCGACGGCTGCCAGCTGCCAGCCCCCTCCCCAAAAGCCGCCCCTCGGCGCTCGCCGCCCCGGCTGCGCGCGTGN98NCCAGCCATAATTTCATTGCAACGAGCAGCAGACTTTTAACTCTTCGCACGCCCCTTCCTTTCCCTCCTCCTCCTCCTCCTCTCTCTCCCCGCAGCAAGCGG	R1@R2@[1]GAG:6:21:38@len=297	[1]GAG:6	40	0	0	0	0
			HaeIII_Both-Ends_CC-117709_CID-1817090:3310779_num=239;Others-197842_CID-6517415:7391729_num=27	CCCACCCGTGTGGGTCAGAGCCCGCGCCCCGACGGCTGCCAGCTGCCAGCCCCCTCCCCAAAAGCCGCCCCTCGGCGCTCGCCGCCCCGGCTGCGCGCGTGN98NATAATTTCATTGCAACGAGCAGCAGACTTTTAACTCTTCGCACGCCCCTTCCTTTCCCTCCTCCTCCTCCTCCTCCTCCTCTCTCTCCCCGCAGCAAGCGG	R1@R2@[1]GAG:8:21:44@len=291;R1@R2@[1]GAG:8:21:44@len=291	[1]GAG:8	26	106	96	136	168
89.9542	3bp-STR-39	C'	HaeIII_Both-Ends_CC-403536_CID-2347425:3269111_num=17	CCCCGCTCCTCCCCACGCCGCAGCGGGGCTGCTCCGCACCCCGCTTCCCCCCGGTACTCACCATCGCCGCCGCACCTTTGTGCTCCTCGGGCGTCCCCCCCN98NTCCCGGGGCTGCTGCTGCTGCTGCGGCGGCGGCGGCGGCGGAGGAGGAGGAGGAAGAGGAGGAGGAGGAGGCGGAGGAAACCCCGAATCCCAGCGGAGCGG	R1@R2@[1]CCT:5:31:45@[2]TCC:5:48:62@[3]GCC:5:63:77@[4]GCA:5:78:92@len=300	[1]CCT:5-[2]TCC:5-[3]GCC:5-[4]GCA:5	0	0	36	2	0
			HaeIII_Both-Ends_CC-283013_CID-2347425:3269110_num=59	CCCCGCTCCTCCCCACGCCGCAGCGGGGCTGCTCCGCACCCCGCTTCCCCCCGGTACTCACCATCGCCGCCGCACCTTTGTGCTCCTCGGGCGTCCCCCCCN98NCGGGGCTGCTGCTGCTGCTGCGGCGGCGGCGGCGGCGGAGGAGGAGGAGGAGGAAGAGGAGGAGGAGGAGGCGGAGGAAACCCCGAATCCCAGCGGAGCGG	R1@R2@[1]CCT:5:31:45@[2]TCC:6:48:65@[3]GCC:5:66:80@[4]GCA:5:81:95@len=297	[1]CCT:5-[2]TCC:6-[3]GCC:5-[4]GCA:5	6	48	30	28	8
90.9542	3bp-STR-40		HaeIII_Both-Ends_CC-368180_CID-505385:1977331_num=24	CCACATCGTGGTGAGCCGTGCCGGGCTGATCCTCCTCCTCCTCCTCCTCCTCCTCCTCCTCCTCTTCCTCCTCCTCCTCCTGCCCCACCAGCCCCAGGTTGN98NCTCCGGCTCCACCGTGCCATCGAGCTCCTCGACCGATTCAGCAGCCAAGACCTCTGAGCGCCCTGGTTCCTCGTGCGTGCCAGAGCCTGCGGCACCCTGGG	R1@[1]TCC:11:30:62@[2]TCC:5:66:80@R2@len=282	[1]TCC:11-[2]TCC:5	6	6	16	10	6
		C'	HaeIII_Both-Ends_CC-420683_CID-505384:1977331_num=14	CCACATCGTGGTGAGCCGTGCCGGGCTGATCCTCCTCCTCCTCCTCCTCCTCCTCCTCTTCCTCCTCCTCCTCCTGCCCCACCAGCCCCAGGTTGCAGCCTN98NCTCCGGCTCCACCGTGCCATCGAGCTCCTCGACCGATTCAGCAGCCAAGACCTCTGAGCGCCCTGGTTCCTCGTGCGTGCCAGAGCCTGCGGCACCCTGGG	R1@[1]TCC:9:30:56@[2]TCC:5:60:74@R2@len=288	[1]TCC:9-[2]TCC:5	0	0	26	0	0
91.9542	3bp-STR-41		HaeIII_Both-Ends_CC-460236_CID-2597996:3373265_num=10	CCCGGGCTCCCCCCCTTCCTCCTCCTCCTCCTCCTCCTCCTCCTCCTGGGCGCTGCCGCTCCCAGCCGCGCGGGGCGTGGCTCGCGGCGGGGGGGGGGGGCN98NGCGGCGGCTCCGCGATGGCGGGAGCGGCTCTTCGCCCTCTACTTCCTCACCCACCTTCCCCTCACGCTGCTCATCGACCTCCAGCCGCTGCTGCCCGCCGG	R1@[1]TCC:10:17:46@R2@len=285	[1]TCC:10	0	10	0	2	4
			HaeIII_Both-Ends_CC-423151_CID-2597999:3373265_num=14	CCCGGGCTCCCCCCCTTCCTCCTCCTCCTCCTCCTCCTCCTCCTGGGCGCTGCCGCTCCCAGCCGCGCGGGGCGTGGCTCGCGGCGGGGGGGGGGGGTCCGN98NGCGGCGGCTCCGCGATGGCGGGAGCGGCTCTTCGCCCTCTACTTCCTCACCCACCTTCCCCTCACGCTGCTCATCGACCTCCAGCCGCTGCTGCCCGCCGG	R1@[1]TCC:9:17:43@R2@len=288	[1]TCC:9	0	14	12	0	0
92.9542	3bp-STR-42		HaeIII_Both-Ends_CC-428386_CID-482299:2774567_num=13	CCACAGGCTTTTGGCTCCCAGGTTAAGCAGACAGAGGAGGAGGAGGAGGAGGAGGAGGAGGAGGAGGATCTGCAGCTGTCTCTTGCTACGCCTGCTGGGAGN98NTTCCTGAACTGCCTTGGAGAGCCAGTCCTGCCGTGGACTAAACAGGCTCCCTACAGCCTTGTCTGATTGTATTTGCTAATGGAATCTGATCCTACAGAGGG	R1@[1]GAG:11:34:66@R2@len=282	[1]GAG:11	4	0	4	12	8
			HaeIII_Both-Ends_CC-296646_CID-482204:2774567_num=51	CCACAGGCTTTTGGCTCCCAGGTTAAGCAGACAGAGGAGGAGGAGGAGGAGGAGGAGGAGGAGGAGGAGGATCTGCAGCTGTCTCTTGCTACGCCTGCTGGN98NTTCCTGAACTGCCTTGGAGAGCCAGTCCTGCCGTGGACTAAACAGGCTCCCTACAGCCTTGTCTGATTGTATTTGCTAATGGAATCTGATCCTACAGAGGG	R1@[1]GAG:12:34:69@R2@len=279	[1]GAG:12	2	30	54	0	10
93.9542	3bp-STR-43		HaeIII_Both-Ends_CC-224237_CID-1244617:4655733_num=104;Others-554549_CID-6242911:8491843_num=15	CCAGGTTTTGTGTGTTCTCTCCTCACTTCATATAATCCTTGACTGTGACTGGGCTTTTTTGGGTTTTTTGTTGTTGTTGTTGTTGTTGTTGTTGTTGTTTTN98NTAAAATGTCTACATAAAATGGCAGCATACGTTCAGAGCAGAAATGCTGTGAAAGGTAAAGAACGGTGCAAAGCTCTTTATGCCATTTTCTGTACCTGAAGG	R1@[1]TTG:10:68:97@R2@len=285;R1@[1]TTG:10:68:97@R2@len=285	[1]TTG:10	44	48	48	22	64
		D	HaeIII_Both-Ends_CC-434036_CID-1244619:4655733_num=13	CCAGGTTTTGTGTGTTCTCTCCTCACTTCATATAATCCTTGACTGTGACTGGGCTTTTTTGGGTTTTTTGTTGTTGTTGTTGTTGTTGTTTTTTTTTTCTTN98NTAAAATGTCTACATAAAATGGCAGCATACGTTCAGAGCAGAAATGCTGTGAAAGGTAAAGAACGGTGCAAAGCTCTTTATGCCATTTTCTGTACCTGAAGG	R1@[1]TTG:7:68:88@R2@len=294	[1]TTG:7	0	2	0	30	0
94.6647	3bp-STR-44		HaeIII_Both-Ends_CC-434608_CID-1038260:3253809_num=13	CCAGCTCCGCTCCCAGCCCCGGGCAACCCGACGGAGCGGGCAGACAAAGCCAGCCCCGCTCGCAGGCAGAGAGAAGGGCTACTTTTGTTCGAGGAGGTGAAN98NAAGAAAGAGAGGGAGGGGAGGGGAGAGCAGGGGAGGGGAGAAGGAAGAAAATCCCAAGAGGAGGAGGAGGAGGAGGAGATATCTCTCCCCTGAAACCGCGG	R1@R2@[1]CTC:7:24:44@len=294	[1]CTC:7	2	0	18	0	6
			HaeIII_Both-Ends_CC-367247_CID-1038260:3253805_num=25	CCAGCTCCGCTCCCAGCCCCGGGCAACCCGACGGAGCGGGCAGACAAAGCCAGCCCCGCTCGCAGGCAGAGAGAAGGGCTACTTTTGTTCGAGGAGGTGAAN98NGAGAGGGAGGAGAGGGGAGAGCAGGGGAGGGGAGAAGGAAGAAAATCCCAAGAGGAGGAGGAGGAGGAGGAGGAGGAGATATCTCTCCCCTGAAACCGCGG	R1@R2@[1]CTC:9:24:50@len=288	[1]CTC:9	0	16	16	16	2
			HaeIII_Both-Ends_CC-434609_CID-1038260:3253808_num=13	CCAGCTCCGCTCCCAGCCCCGGGCAACCCGACGGAGCGGGCAGACAAAGCCAGCCCCGCTCGCAGGCAGAGAGAAGGGCTACTTTTGTTCGAGGAGGTGAAN98NAAAGAGAGGGAGGGGAGGGGAGAGCAGGGGAGGGGAGAAGGAAGAAAATCCCAAGAGGAGGAGGAGGAGGAGGAGGAGATATCTCTCCCCTGAAACCGCGG	R1@R2@[1]CTC:8:24:47@len=291	[1]CTC:8	4	10	0	14	0
95.7238	3bp-STR-45	C	HaeIII_Both-Ends_CC-448332_CID-3066998:4073031_num=11	CCGAGACAACCGGTCCTGCTCAAAAGCGTGGCATTCAAGCAGAGCTAAACCCAAATTACCTGCCTTATTCGTAGCCTGCTATTAAATAAAACCCTTCAACTN98NAAATATAAAATAATTAGGGATCTCCTCCTCCTCCTCCTGAGAATAAATGTCATTCCATAGCTGTAACTACTGGGGGTGTGGGGTTTCGCCTCCCGTAGAGG	R1@R2@[1]AGG:5:64:78@len=300	[1]AGG:5	0	0	22	0	0
			HaeIII_Both-Ends_CC-220513_CID-3066998:4073030_num=107	CCGAGACAACCGGTCCTGCTCAAAAGCGTGGCATTCAAGCAGAGCTAAACCCAAATTACCTGCCTTATTCGTAGCCTGCTATTAAATAAAACCCTTCAACTN98NTATAAAATAATTAGGGATCTCCTCCTCCTCCTCCTCCTGAGAATAAATGTCATTCCATAGCTGTAACTACTGGGGGTGTGGGGTTTCGCCTCCCGTAGAGG	R1@R2@[1]AGG:6:64:81@len=297	[1]AGG:6	44	60	12	32	78
96.7238	3bp-STR-46	D'	HaeIII_Both-Ends_CC-449756_CID-2372675:3049953_num=11	CCCCGGGGGCTCCCTCCTCCTCCTCCTCCTGTCCGTTACGTTTTTAAAAGCATCAGTAACGCGCTGCTTTGCACGGGGCGCACCTGCTCAGAGCGGCTCTGN98NAGCGCCCGGGAGCATCCTCCTGCCCTCGCAGGCGCCTCCGCCTTCCCGCCCGGAGGCGGCTCTGCCGTCCAGGTGACGGCGGGGGCTCAGGCTCGTGTCGG	R1@[1]CCT:6:13:30@R2@len=297	[1]CCT:6	0	0	0	24	0
			HaeIII_Both-Ends_CC-247050_CID-2372666:3049953_num=84	CCCCGGGGGCTCCCTCCTCCTCCTCCTCCTCCTCCTGTCCGTTACGTTTTTAAAAGCATCAGTAACGCGCTGCTTTGCACGGGGCGCACCTGCTCAGAGCGN98NAGCGCCCGGGAGCATCCTCCTGCCCTCGCAGGCGCCTCCGCCTTCCCGCCCGGAGGCGGCTCTGCCGTCCAGGTGACGGCGGGGGCTCAGGCTCGTGTCGG	R1@[1]CCT:8:13:36@R2@len=291	[1]CCT:8	24	56	50	20	16
97.7238	3bp-STR-47		HaeIII_Both-Ends_CC-452210_CID-1481237:1739842_num=11	CCATCTCGTCTAGATTATTACTATTAAACTATATAAATATATAAACTATATAATAATAATAATAATAATAATAATAATATACCATGAGGGTGCCCTAAAAAN98NGGGCTAAGAATAATAAGTCTGATATTTTGATTGTTGGCACCAATTAGTTCAGGTTTGTCTTTGCACCTATGTGAAGGTTATCATAAGACATTAAATTTGGG	R1@[1]ATA:10:50:79@R2@len=285	[1]ATA:10	6	2	0	10	8
			HaeIII_Both-Ends_CC-349133_CID-1481235:1739842_num=30	CCATCTCGTCTAGATTATTACTATTAAACTATATAAATATATAAACTATATAATAATAATAATAATAATAATAATAATAATAATAATAATAATAATAATAAN98NGGGCTAAGAATAATAAGTCTGATATTTTGATTGTTGGCACCAATTAGTTCAGGTTTGTCTTTGCACCTATGTGAAGGTTATCATAAGACATTAAATTTGGG	R1@[1]ATA:17:50:100@R2@len=264	[1]ATA:17	22	10	30	0	0
98.7238	3bp-STR-48		HaeIII_Both-Ends_CC-298320_CID-628385:3206514_num=50	CCTCCTTGCTAAGCTTCGGCATTCCGGCGGCGGGGGAGAGAAGAGGAGGAGGAGGAGGAGGAGGAGGAGGAGCCGCCCAGCCGCCCTCGTAACGCGGCGGCN98NCCCCCTCGGCGGAGGCGGGGGGCGGTCCTGCCCTAGGAAGGGCGAGGAAATGGCGGCGGCGGGGCTCCTTCCGCTCGTCGCCGCCCGCCGGGCATCGGCGG	R1@[1]GAG:10:43:72@R2@len=285	[1]GAG:10	6	36	10	34	14
		C'	HaeIII_Both-Ends_CC-458841_CID-3206514:4019892_num=10	CCGCCGATGCCCGGCGGGCGGCGACGAGCGGAAGGAGCCCCGCCGCCGCCATTTCCTCGCCCTTCCTAGGGCAGGACCGCCCCCCGCCTCCGCCGAGGGGGN98NGCCCCGCCCGCCGCCGCCGCGTTACGAGGGCGGCTGGGCGGCTCCTCCTCCTCCTCCTCTTCTCTCCCCCGCCGCCGGAATGCCGAAGCTTAGCAAGGAGG	R1@R2@[1]GAG:6:43:60@len=297	[1]GAG:6	0	0	20	0	0
99.7238	3bp-STR-49	C'	HaeIII_Both-Ends_CC-464112_CID-1339508:1401989_num=10	CCAGTTTATTTAACATTATTATTATTATTATTATTATTATTATTATTATTATTATTATTATTACACTTTTCTGTGGAAATGTACTTGTTTCAGTGATTCCTN98NATTCTCAGTTTCTCAGTACAGGGATCAGCTTTTACTCTTTAGACATCTCATTTTAATGTTTCTCCATCACAATCCGGGGCTAGGCACAAGGGAATATATGG	R1@[1]ATT:16:15:62@R2@len=267	[1]ATT:16	2	0	14	0	4
			HaeIII_Both-Ends_CC-290513_CID-1339511:1401989_num=55	CCAGTTTATTTAACATTATTATTATTATTATTATTATTATTATTATTATTATTATTATTATTATTACACTTTTCTGTGGAAATGTACTTGTTTCAGTGATTN98NATTCTCAGTTTCTCAGTACAGGGATCAGCTTTTACTCTTTAGACATCTCATTTTAATGTTTCTCCATCACAATCCGGGGCTAGGCACAAGGGAATATATGG	R1@[1]ATT:17:15:65@R2@len=264	[1]ATT:17	30	30	8	28	26
100.724	3bp-STR-50		HaeIII_Both-Ends_CC-82124_CID-2349480:2692857_num=302	CCCCTCTGCCACGTCCCTGGCGCTGGGAGATGGCGGGGGGGGGGGGGGGTTGTATCCCCGCACCCCCTGGTCAGTGGGGCTCAGCCCCCTCCCCGCTCCCCN98NCTGCAGCCCCTGGGGAGGCGGAAGCGCGTCCGCCGCGTGGAGGAGGAGGAGGAGGATTGAGGGGCTCCCCCTGCCCTGCCCTGCCCTGCCTGCGCCTAGGG	R1@R2@[1]TCC:6:46:63@len=297	[1]TCC:6	32	66	180	174	196
		B	HaeIII_Both-Ends_CC-358410_CID-2349480:2692992_num=27	CCCCTCTGCCACGTCCCTGGCGCTGGGAGATGGCGGGGGGGGGGGGGGGTTGTATCCCCGCACCCCCTGGTCAGTGGGGCTCAGCCCCCTCCCCGCTCCCCN98NCTGGGGAGGCGGAAGCGCGTCCGCCGCGTGGAGGAGGAGGAGGAGGAGGAGGAGGATTGAGGGGCTCCCCCTGCCCTGCCCTGCCCTGCCTGCGCCTAGGG	R1@R2@[1]TCC:9:46:72@len=288	[1]TCC:9	0	58	0	0	0
101.724	3bp-STR-51		MboI_Both-Ends_GATC-182202_CID-623566:1285690_num=15	GATCCATCCTCTTGGGCTTTTTAAAGGGTGTTGTGGTTTAACCCCAGTCAGCAACTAAGCACCACACAGCCGCTTGCTCACCCTCCCCTCCCCCAGTGGGAN98NAGGAAGGATGATAATAATAATAATAATAATAATAATAATAATAATAATGATAAAAGAATATACAAGTAATGCACAATGCAATTGCTCACTACCCGCAGATC	R1@R2@[1]ATT:12:54:89@len=279	[1]ATT:12	16	0	0	10	8
			MboI_Both-Ends_GATC-214165_CID-623566:1285691_num=12	GATCCATCCTCTTGGGCTTTTTAAAGGGTGTTGTGGTTTAACCCCAGTCAGCAACTAAGCACCACACAGCCGCTTGCTCACCCTCCCCTCCCCCAGTGGGAN98NAATAATAATAATAATAATAATAATAATAATAATAATAATAATAATAATGATAAAAGAATATACAAGTAATGCACAATGCAATTGCTCACTACCCGCAGATC	R1@R2@[1]ATT:16:54:101@len=267	[1]ATT:16	12	4	8	0	0
102.724	3bp-STR-52		MboI_Both-Ends_GATC-215210_CID-52800:1061836_num=12	GATCAACACAGCAGGATGCCGAAGACGACGACCCCAGCATCCCTGCTGGCACGACTCCCCTGCAGATGGCAATTATGCTCTTCCCATCTTGACGCTGACTAN98NCGCTTTCGGCTTGGTGTGCGTGCTCCCCTCTCAGGTGCTGTGCCTGCATGGCTATGAAACCATCCTCCTCCTCCTCCTCCTCCTCCTCCTCCAGCTAGATC	R1@R2@[1]GGA:10:10:39@len=285	[1]GGA:10	18	6	6	16	0
			MboI_Both-Ends_GATC-183037_CID-52800:1061838_num=15	GATCAACACAGCAGGATGCCGAAGACGACGACCCCAGCATCCCTGCTGGCACGACTCCCCTGCAGATGGCAATTATGCTCTTCCCATCTTGACGCTGACTAN98NCAGATACGCTTTCGGCTTGGTGTGCGTGCTCCCCTCTCAGGTGCTGTGCCTGCATGGCTATGAAACCATCCTCCTCCTCCTCCTCCTCCTCCAGCTAGATC	R1@R2@[1]GGA:8:10:33@len=291	[1]GGA:8	0	6	10	12	6
103.724	3bp-STR-53		MboI_Both-Ends_GATC-214859_CID-560771:875508_num=12	GATCCACCTCCAGCAGCAGCAGCAGCAGCAGCAGCAGCAGCAGGAGGAGATGCTGATGGCCACCCTGAACGGAGGGGCTGCCTTCAATGCCCCCCGGCCGGN98NATGACGGAGGGGAACGCGGCTTCGGCGAGAGCAGGCTGTCTGCCGAGGCCCCGGGGAGCCAGGCCGGGCGCCGGGGCTGGGAAGCGGAGCCCGACAGGATC	R1@[1]CAG:11:11:43@R2@len=282	[1]CAG:11	12	0	16	0	0
			MboI_Both-Ends_GATC-30233_CID-560769:875508_num=48;Others-583176_CID-1335684:2445190_num=15	GATCCACCTCCAGCAGCAGCAGCAGCAGCAGCAGCAGCAGCAGCAGCAGCAGCAGGAGGAGATGCTGATGGCCACCCTGAACGGAGGGGCTGCCTTCAATGN98NATGACGGAGGGGAACGCGGCTTCGGCGAGAGCAGGCTGTCTGCCGAGGCCCCGGGGAGCCAGGCCGGGCGCCGGGGCTGGGAAGCGGAGCCCGACAGGATC	R1@[1]CAG:15:11:55@R2@len=270;R1@[1]CAG:15:11:55@R2@len=270	[1]CAG:15	0	24	0	64	60
104.724	3bp-STR-54		MboI_Both-Ends_GATC-226666_CID-593077:688457_num=11	GATCCAGCTCTGGCAGTGGCAGATGCAGTCCTCACGGTGGAGGGATGAGCTCTGGTGGTGGCAGCAGCTCTGGCAGGAGAGGCTCCATGTCTGGAAGTGGTN98NTCTGGCAGTGGCGGGTCCATGTCTGGAGGAGGAGGAGGAGGAAGCTCAGGCAGTGGAGGCTCCATGTCTGGAGGTGGCCACAGCTCTGGAGGATGGGGATC	R1@R2@[1]TCC:6:60:77@len=297	[1]TCC:6	2	6	8	8	10
			Others-338883_CID-1340624:1355119_num=21	GATCCAGCTCTGGCAGTGGCAGATGCAGTCCTCACGGTGCAGGGATGAGCTCTGGTGGTGGCAGCAGCTCTGGCAGGAGAGGCTCCATGTCTGGAGGTGGGN98NTCTGGCAGTGGCGGGTCCATGTCTGGAGGAGGAGGAGGAGGAAGCTCAGGCAGTGGAGGCTCCATGTCTGGAGGTGGCCACAGCTCTGGAGGATGGGGATC	R1@R2@[1]TCC:6:60:77@len=297	[1]TCC:6	6	0	12	4	0
105.724	3bp-STR-55		MboI_Both-Ends_GATC-47735_CID-347524:606697_num=40	GATCAGGTCAGTCTGGCATGTTTTGCCTTTGGTAAAGCCACACTGGTTTTTCCCAATCACCTGCTTCATTTGTCTTCTAACAGTCTCTAGGAGGGCTCCTTN98NATGATGATGATGATGATGATGATGATGATGATGATGATGATGATGATGATGATGATGATGATGGACCAAATTTGAAAAACTGAAATGAAAGATACTGGATC	R1@R2@[1]CAT:21:39:101@len=252	[1]CAT:21	20	14	14	28	16
			Others-646923_CID-1304732:11036758_num=14	GATCAGGTCAGTCTGGCATGTTTTGCCTTTGGTAAAGCCACACTGGTTTTTCCCAATCACCTGCTTCATTTGTCTTCTAACAGTCTCTAGGAGGGCTCCTTN98NATGATGATGATGATGATGATGATGATGATGATGATGATGATGATGATGATGATGATGATGATGATGATGGACCAAATTTGAAAAACTGAAATGAAAGATAC	R1@R2@[1]CAT:23:33:101@len=246	[1]CAT:23	8	0	2	8	10
106.724	3bp-STR-56		MboI_Both-Ends_GATC-61392_CID-775589:976823_num=35;Others-825370_CID-8035712:8098039_num=11	GATCCGTAAGACGAAAAGAAAAAAAAAACAAAAACAAAAAACCAACAACAACAAACCCCAAGTTACTTTAAAAACAACGTAATTATGGAATAAATAAAAACN98NCCTCCTCCTCCTCCTCCTCCCCGGGACGGGCGCGCTGGCTCCTTTCGGCTCCGCAGCCGCGGGGAGACGCGGGGCTCGGGCCTCCCCGCCCCGTCCCGATC	R1@R2@[1]GGA:6:82:99@len=297;R1@R2@[1]GGA:6:82:99@len=297	[1]GGA:6	22	16	14	24	14
			Others-449637_CID-8035712:11220278_num=17	GATCCGTAAGACGAAAAGAAAAAAAAAACAAAAACAAAAAACCAACAACAACAAACCCCAAGTTACTTTAAAAACAACGTAATTATGGAATAAATAAAAACN98NTTCCTCCTCCTCCTCCTCCTCCTCCCCGGGACGGGCGCGCTGGCTCCTTTCGGCTCCGCAGCCGCGGGGAGACGCGGGGCTCGGGCCTCCCCGCCCCGTCC	R1@R2@[1]GGA:8:77:100@len=291	[1]GGA:8	0	6	0	18	10
107.724	3bp-STR-57		Others-919449_CID-8960915:15159290_num=10	CTACGAGGTGGCTCTGCGGGATTTCCGGCAAGCGCGGCGCGAGGTGGAAGCCATGAGCATCGTCAAGATGAAAGAGCTTTGCCGGCGTTACGGCAAGCGCGN98NCGGTGGGAGGAGGCGAAGAGGACGGCGGCGGCGGCGGCGGCGGCGGCGGCGGGGCGGAGGTGGAGGGGCTGCGGGCCCACCTGGACAAGCTGGCGGGGATC	R1@R2@[1]CCG:10:50:79@len=285	[1]CCG:10	2	0	0	18	0
			Others-166077_CID-8011587:8960915_num=29	GATCCCCGCCAGCTTGTCCAGGTGGGCCCGCAGCCCCTCCACCTCCGCCCCGCCGCCGCCGCCGCCGCCGCCGTCCTCTTCGCCTCCTCCCACCGTATCCCN98NCGCGCTTGCCGTAACGCCGGCAAAGCTCTTTCATCTTGACGATGCTCATGGCTTCCACCTCGCGCCGCGCTTGCCGGAAATCCCGCAGAGCCACCTCGTAG	R1@[1]CCG:8:50:73@R2@len=291	[1]CCG:8	4	8	22	14	10
108.724	3bp-STR-58		Others-317015_CID-8098039:11769985_num=21	GATCGGGACGGGGCGGGGAGGCCCGAGCCCCGCGTCTCCCCGCGGCTGCGGAGCCGAAAGGAGCCAGCGCGCCCGTCCCGGGGAGGAGGAGGAGGAGGAGGN98NCCCTTGTTTTTATTTATTCCATAATTACGTTGTTTTTAAAGTAACTTGGGGTTTGTTGTTGTTGGTTTTTTGTTTTTGTTTTTTTTTTCTTTTCGTCTTAC	R1@[1]GGA:6:82:99@R2@len=297	[1]GGA:6	10	6	10	16	4
			Others-444348_CID-11220278:11769985_num=18	GGACGGGGCGGGGAGGCCCGAGCCCCGCGTCTCCCCGCGGCTGCGGAGCCGAAAGGAGCCAGCGCGCCCGTCCCGGGGAGGAGGAGGAGGAGGAGGAGGAAN98NCCCTTGTTTTTATTTATTCCATAATTACGTTGTTTTTAAAGTAACTTGGGGTTTGTTGTTGTTGGTTTTTTGTTTTTGTTTTTTTTTTCTTTTCGTCTTAC	R1@[1]GGA:8:77:100@R2@len=291	[1]GGA:8	4	10	0	12	10
109.724	3bp-STR-59		Others-540055_CID-8171830:13328280_num=15	GATCTGAAAAGGTATACAGGTAAGAGGAGCTTCCTTGTAGCTTCCTCAGTGTTTCTTTTTTGGGAGTTCAGGATGTGCTTTTCCTCCAACCCTGCATTTCCN98NATCTGTAGCTATGCAGAAGACACCCTACACCTGTAGAGTGCAAGAAGAAGAAGAAGAAAAAAAAGGCCTGTTGAACCTCCATTGCTTGGAAGAGAGCAAAG	R1@R2@[1]TTC:5:44:58@len=300	[1]TTC:5	10	2	14	4	0
			Others-179333_CID-8171830:13328278_num=28	GATCTGAAAAGGTATACAGGTAAGAGGAGCTTCCTTGTAGCTTCCTCAGTGTTTCTTTTTTGGGAGTTCAGGATGTGCTTTTCCTCCAACCCTGCATTTCCN98NAGCTATGCAGAAGACACCCTACACCTGTAGAGTGCAAGAAGAAGAAGAAGAAGAAGAAAAAAAAGGCCTGTTGAACCTCCATTGCTTGGAAGAGAGCAAAG	R1@R2@[1]TTC:7:44:64@len=294	[1]TTC:7	14	8	0	14	20
110.724	3bp-STR-60		Others-9711_CID-6573987:6946497_num=88	CGCAGCTGGTGCGTGGACACCACCGACTATGACCACTCAGCAGGGAGGAGGAGGAGGACAACCGGTCCTCCAAGGTGTGACTGCACTCCCAGGGATGACACN98NAGGGATGACACAGCTGCAGGGCCCTCCAACGGCAGCTCCCAGTCGGCTCCTGCACCCAGTGCTGCTCGGGAGCAAACCCTGCCAGTGCAGAGAGAGCAGAG	R1@[1]GGA:5:44:58@R2@len=300	[1]GGA:5	42	22	46	24	38
			Others-90376_CID-6573992:6946497_num=37	CGCAGCTGGTGCGTGGACACCACCGACTATGACCACTCAGCAGGGAGGAGGAGGAGGAGGAGAACTGGTCCTCCAAGGTGTGACTGCACTCCCAGGGATGAN98NAGGGATGACACAGCTGCAGGGCCCTCCAACGGCAGCTCCCAGTCGGCTCCTGCACCCAGTGCTGCTCGGGAGCAAACCCTGCCAGTGCAGAGAGAGCAGAG	R1@[1]GGA:6:44:61@R2@len=297	[1]GGA:6	16	0	28	16	14
111.724	4bp-STR-1		HaeIII_Both-Ends_CC-108240_CID-1094073:2561912_num=255;Others-612449_CID-6236853:8344394_num=14	CCAGGTGAACAAGCATGTGTTTTGGGTGGTTTTTTTGTGTTTTTTGTTTGGTGTTTTGTTGTTTGTTTGTTTGTTTGTTTTTTTAATACAGTTTCAGCAGAN98NACTGAAAAGCTTTTAAACCACAGCAGCACGATCTACAAAGAGCTGGCAAGGAACCTGAGCAAACCCAGAATGGAGTGACTCACCTCAGAGGAGAGAGCAGG	R1@[1]TTGT:5:59:78@R2@len=296;R1@[1]TTGT:5:59:78@R2@len=296	[1]TTGT:5	96	170	76	152	42
			HaeIII_Both-Ends_CC-285260_CID-1197112:2561912_num=58	CCAGGTGAACAAGCATGTGTTTTGGGTGGTTTTTTTGTGTTTTTTGTTTGGTGTTTTGTTGTTTGTTTGTTTGTTTGTTTGTTTGTTTTTTTAATACAGTTN98NACTGAAAAGCTTTTAAACCACAGCAGCACGATCTACAAAGAGCTGGCAAGGAACCTGAGCAAACCCAGAATGGAGTGACTCACCTCAGAGGAGAGAGCAGG	R1@[1]TTGT:7:59:86@R2@len=288	[1]TTGT:7	0	0	68	0	54
112.724	4bp-STR-2		HaeIII_Both-Ends_CC-123459_CID-1028230:3293558_num=230;Others-270918_CID-7370075:7470347_num=23	CCGGCGTTTGCCCGTTGGAAACGGGTACGGCGTATATAAAAGCCGTCGCACCTGGGAAAAGCGTTGGGTTGTGTGGTTTGTTTTTTGTTTTTTTTTTTTTTN98NGGCATGCTTCCATTGATTTAGTTGTTTGTTTGTTTGTTTGTTTGTTTGTTTTCCCGAACGGGACCACCCCCCAGCCCAGCAAGGTGGCGGGGAGGCAGCGG	R1@R2@[1]AAAC:7:51:78@len=288;R1@[1]AAAC:7:51:78@R2@len=288	[1]AAAC:7	72	188	62	152	32
			HaeIII_Both-Ends_CC-282018_CID-1028230:3293560_num=60	CCGGCGTTTGCCCGTTGGAAACGGGTACGGCGTATATAAAAGCCGTCGCACCTGGGAAAAGCGTTGGGTTGTGTGGTTTGTTTTTTGTTTTTTTTTTTTTTN98NTCCATTGATTTAGTTGTTTGTTTGTTTGTTTGTTTGTTTGTTTGTTTGTTTTCCCGAACGGGACCACCCCCCAGCCCAGCAAGGTGGCGGGGAGGCAGCGG	R1@R2@[1]AAAC:9:51:86@len=280	[1]AAAC:9	0	0	64	0	62
113.724	4bp-STR-3		HaeIII_Both-Ends_CC-178142_CID-832372:2822806_num=153;Others-599180_CID-797088:1839903_num=14	CCAGAGCTGGATGCTACCCTGCACCACCAGCCCTGGCAACTCAGTACCGCAATCAGCCTACACCATTTACGTCTTTCCCCACCGGTGAAGTCTTATTTGTGN98NTTGTATTGAAATACTGTAGGGGAGTCTCCTGATTGCTTGCATGGATGCAAGGAGCATCTGCCTGCCTGCCTGCCTGCCTGCCTGCCTGCCTGCCTGCAGGG	R1@R2@[1]GCAG:10:5:44@len=276;R1@[1]GCAG:10:5:44@R2@len=276	[1]GCAG:10	0	106	64	86	76
			HaeIII_Both-Ends_CC-123498_CID-832372:2822801_num=229;Others-283122_CID-1839903:6936367_num=23	CCAGAGCTGGATGCTACCCTGCACCACCAGCCCTGGCAACTCAGTACCGCAATCAGCCTACACCATTTACGTCTTTCCCCACCGGTGAAGTCTTATTTGTGN98NTTCTTTGTGTTGAAATACTGTAGGGGAGTCTCCTGATTGCTTGCATGGATGCAAGGAGCATCTGCCTGCCTGCCTGCCTGCCTGCCTGCCTGCCTGCAGGG	R1@R2@[1]GCAG:9:5:40@len=280;R1@R2@[1]GCAG:9:5:40@len=280	[1]GCAG:9	138	98	86	82	98
114.724	4bp-STR-4		HaeIII_Both-Ends_CC-136111_CID-267213:2923237_num=210;Others-271729_CID-6973289:7504832_num=23	CCGGGCTAATAATAGAACTCCGGCTAACTTTCCAAGTTTGATCGTTTTTCAGTTTAAACCAGACTCCAGTATGTCTCTGTGGATAAAGACGACAGCCTGTTN98NCACAAAGGAATTTGGGTTAAAGAAAAAATAGCAAAAAACTCCACAGATAAAGAAAGAAAGAAAGAAACCTCCTTTCAGTGATGGCAGAGAATGGCACAGGG	R1@R2@[1]TTTC:4:35:50@len=300;R1@[1]TTTC:4:35:50@R2@len=300	[1]TTTC:4	120	48	46	128	124
			HaeIII_Both-Ends_CC-293478_CID-267213:2924027_num=53	CCGGGCTAATAATAGAACTCCGGCTAACTTTCCAAGTTTGATCGTTTTTCAGTTTAAACCAGACTCCAGTATGTCTCTGTGGATAAAGACGACAGCCTGTTN98NAAGGAATTTGGGTTAAAGAAAAAATAGCAAAAAACTCCACAGATAAAGAAAGAAAGAAAGAAAGAAACCTCCTTTCAGTGATGGCAGAGAATGGCACAGGG	R1@R2@[1]TTTC:5:35:54@len=296	[1]TTTC:5	0	62	44	0	0
115.724	4bp-STR-5		HaeIII_Both-Ends_CC-141839_CID-1051189:4079741_num=202	CCAGCTGCTGCACAATCTCAGAAGGATGGATGGATGGATGGATGGATGGATGAATGGATGGATGGACGGACGCAGTGAGTTTAAGACAAGCTATTTTCTGCN98NGAAGCAGTAAGAAAGCCTTTTGCTGGCTAATTTGATACACATGACCAAAACTTACTAGGAAGAAGGAGGAGGAAGATGGAGGCAGCAAAAATTTTGAGAGG	R1@[1]GGAT:7:24:51@R2@len=288	[1]GGAT:7	24	102	168	88	38
		A	HaeIII_Both-Ends_CC-426307_CID-1052214:4079741_num=14	CCAGCTGCTGCACAATCTCAGAAGGATGGATGGATGGATGGATGGATGGATGGATGGATGAATGGATGGATGGACGGACGCAGTGAGTTTAAGACAAGCTAN98NGAAGCAGTAAGAAAGCCTTTTGCTGGCTAATTTGATACACATGACCAAAACTTACTAGGAAGAAGGAGGAGGAAGATGGAGGCAGCAAAAATTTTGAGAGG	R1@[1]GGAT:9:24:59@R2@len=280	[1]GGAT:9	30	0	0	0	0
116.724	4bp-STR-6		HaeIII_Both-Ends_CC-145590_CID-3839818:4350245_num=196;Others-741004_CID-7916422:10818629_num=12	CCTCAGTGGATACGCTGCCTCAGAGGGGCTTGATGAAGTGGATAACTGTTCAGGTTTGGTCCACTCAGGGTGTGAACCCAGTGCGACATTTTCTGAGAGAAN98NCAGTCTATGAGTCTCTATAGTGTTAGGTGCTTGAAGCCAAATAATACCAAGAATGAGGACAGACAGACAGACATAGCAAAACCACCGCCCTCAAGAGCAGG	R1@R2@[1]TGTC:4:29:44@len=300;R1@R2@[1]TGTC:4:29:44@len=300	[1]TGTC:4	0	0	98	242	74
			HaeIII_Both-Ends_CC-104510_CID-2562268:3839818_num=261;Others-318270_CID-7916422:8344948_num=21	CCTGCTCTTGAGGGCGGTGGTTTTGCTATGTCTGTCTGTCTGTCTGTCCTCATTCTTGGTATTATTTGGCTTCAAGCACCTAACACTATAGAGACTCATAGN98NTTCTCTCAGAAAATGTCGCACTGGGTTCACACCCTGAGTGGACCAAACCTGAACAGTTATCCACTTCATCAAGCCCCTCTGAGGCAGCGTATCCACTGAGG	R1@[1]TGTC:5:29:48@R2@len=296;R1@R2@[1]TGTC:5:29:48@len=296	[1]TGTC:5	160	170	146	0	86
117.724	4bp-STR-7	A	HaeIII_Both-Ends_CC-401179_CID-547167:962245_num=17	CCACCAGTGAGAAAAAAAAAAAAAAATCTATCTATCTATCTATCTATCTATCTATCTATCTATCTATCTAAGCAGGAACCCCCTTAGTCCAAAAGGTGATTN98NAAAGTGGTCATTCCTTGGGAGCCCTTCATTTTCGTCCCCCCTGCCACTGTGCATCCCTGTGCTCTTCTGGGCTTCTGCAGAAACCTTTGCTGCGATGATGG	R1@[1]ATCT:11:26:69@R2@len=272	[1]ATCT:11	34	0	0	0	0
			HaeIII_Both-Ends_CC-149037_CID-547133:962245_num=191;Others-506552_CID-5988911:6332404_num=16	CCACCAGTGAGAAAAAAAAAAAAAAATCTATCTATCTATCTATCTATCTATCTATCTAAGCAGGAACCCCCTTAGTCCAAAAGGTGATTGGACAGCTGCTCN98NAAAGTGGTCATTCCTTGGGAGCCCTTCATTTTCGTCCCCCCTGCCACTGTGCATCCCTGTGCTCTTCTGGGCTTCTGCAGAAACCTTTGCTGCGATGATGG	R1@[1]ATCT:8:26:57@R2@len=284;R1@[1]ATCT:8:26:57@R2@len=284	[1]ATCT:8	30	74	78	92	98
119	4bp-STR-8		HaeIII_Both-Ends_CC-127082_CID-1638789:2390714_num=224;Others-302464_CID-4638082:6414707_num=22	CCATTCCCATCCGCACCTGTCCATCCATCCATCCATCCATCCATCCATCCATCCATCCACCCTTTCATAGCAGTCTGGCTGCTTGTGAGAACTGACCCTCCN98NCTCTCCCAGGCAGCAGCTGGGGGGACATGTGTGTTGACCCACAGTCCTCCTCTCTCTCTCCCCCATTTGAAGGGGACAGCCCTGCACTGATGAGAAAGGGG	R1@[1]TCCA:10:20:59@R2@len=276;R1@R2@[1]TCCA:10:20:59@len=276	[1]TCCA:10	4	66	308	114	0
			HaeIII_Both-Ends_CC-270501_CID-1637261:2390714_num=67;Others-562207_CID-4638082:6414708_num=15	CCATTCCCATCCGCACCTGTCCATCCATCCATCCATCCATCCATCCATCCATCCATCCATCCACCCTTTCATAGCAGTCTGGCTGCTTGTGAGAACTGACCN98NCTCTCCCAGGCAGCAGCTGGGGGGACATGTGTGTTGACCCACAGTCCTCCTCTCTCTCTCCCCCATTTGAAGGGGACAGCCCTGCACTGATGAGAAAGGGG	R1@[1]TCCA:11:20:63@R2@len=272;R1@R2@[1]TCCA:11:20:63@len=272	[1]TCCA:11	66	0	0	0	98
			HaeIII_Both-Ends_CC-153813_CID-1638751:2390714_num=185;Others-767829_CID-4638082:6414706_num=12	CCATTCCCATCCGCACCTGTCCATCCATCCATCCATCCATCCATCCATCCATCCACCCTTTCATAGCAGTCTGGCTGCTTGTGAGAACTGACCCTCCAGAGN98NCTCTCCCAGGCAGCAGCTGGGGGGACATGTGTGTTGACCCACAGTCCTCCTCTCTCTCTCCCCCATTTGAAGGGGACAGCCCTGCACTGATGAGAAAGGGG	R1@[1]TCCA:9:20:55@R2@len=280;R1@R2@[1]TCCA:9:20:55@len=280	[1]TCCA:9	88	90	2	104	110
120	4bp-STR-9		HaeIII_Both-Ends_CC-154075_CID-792340:1773008_num=184;Others-614011_CID-6081401:6688923_num=14	CCAGAAATGAGCTCCTTGATTTCTACCAATAAACTATCACAGGTGCAGCCAGATCACTGAAAATACTTTCAAATCACAACATCATCCTGATCCAGCCCACCN98NAAAGAGAAACATCTATTAAAAAACGAAAAAGAAATACCAAACAAACAAACAAACAAACAAACAAACCCCAAAACCAGCTCAAGAGAGAATCTTGACTGGGG	R1@R2@[1]GTTT:7:36:63@len=288;R1@R2@[1]GTTT:7:36:63@len=288	[1]GTTT:7	2	56	126	114	98
			HaeIII_Both-Ends_CC-269470_CID-792340:2169716_num=67	CCAGAAATGAGCTCCTTGATTTCTACCAATAAACTATCACAGGTGCAGCCAGATCACTGAAAATACTTTCAAATCACAACATCATCCTGATCCAGCCCACCN98NAGAAACATCTATTAAAAAACGAAAAAGAAATACCAAACAAACAAACAAACAAACAAACAAACAAACCCCAAAACCAGCTCAAGAGAGAATCTTGACTGGGG	R1@R2@[1]GTTT:8:36:67@len=284	[1]GTTT:8	96	46	0	0	0
121	4bp-STR-10		HaeIII_Both-Ends_CC-154934_CID-64474:2448151_num=183;Others-418577_CID-6519778:6778409_num=18	CCCACCTCTCCAGCCTGTCAAGGTCCCTCTGGATGGGATCCCTACCCTCCAGAGTGTCGACCACACCACACAGCCTGGTGTCATCGGCAAACTTGCTGAGGN98NATAGAGTTTGCTCAAAACAAAACAAACAAACAAACCAACCCTCACTTGACACTTCTGACTGTATGGGGAAGGGAGGGAAGGAAACCAGCAGTAGTCAGGGG	R1@R2@[1]GTTT:4:67:82@len=300;R1@R2@[1]GTTT:4:67:82@len=300	[1]GTTT:4	58	56	170	0	116
			HaeIII_Both-Ends_CC-174138_CID-64474:2447634_num=158;Others-753965_CID-6519778:6778408_num=12	CCCACCTCTCCAGCCTGTCAAGGTCCCTCTGGATGGGATCCCTACCCTCCAGAGTGTCGACCACACCACACAGCCTGGTGTCATCGGCAAACTTGCTGAGGN98NAGTTTGCTCAAAACAAAACAAACAAACAAACAAACCAACCCTCACTTGACACTTCTGACTGTATGGGGAAGGGAGGGAAGGAAACCAGCAGTAGTCAGGGG	R1@R2@[1]GTTT:5:67:86@len=296;R1@R2@[1]GTTT:5:67:86@len=296	[1]GTTT:5	60	70	2	118	88
122	4bp-STR-11		HaeIII_Both-Ends_CC-312721_CID-776974:2986793_num=43	CCACTTTCCAGCTGGATCAACACCCTCCAGAATGTTCATTCTATTTATTTATTTATTTATTTATTTATTTATTTATTTATTCATTTATTTATTTATTTTTAN98NATTAAATTTCTATTATGAGTGATGGTCCTGGTGCCCCCAGTCCCCCTGTCCCTTCAGAGCAAACTTGTGTCACAAGCAAGTGCTGAAGCCTGAGCCAAGGG	R1@[1]TATT:10:42:81@[2]ATTT:4:83:98@R2@len=276	[1]TATT:10-[2]ATTT:4	38	0	56	0	0
			HaeIII_Both-Ends_CC-156358_CID-776967:2986793_num=181;Others-614100_CID-6072573:7008087_num=14	CCACTTTCCAGCTGGATCAACACCCTCCAGAATGTTCATTCTATTTATTTATTTATTTATTTATTTATTTATTTATTCATTTATTTATTTATTTTTAACACN98NATTAAATTTCTATTATGAGTGATGGTCCTGGTGCCCCCAGTCCCCCTGTCCCTTCAGAGCAAACTTGTGTCACAAGCAAGTGCTGAAGCCTGAGCCAAGGG	R1@[1]TATT:9:42:77@[2]ATTT:4:79:94@R2@len=280;R1@[1]TATT:9:42:77@[2]ATTT:4:79:94@R2@len=280	[1]TATT:9-[2]ATTT:4	52	98	38	110	90
123	4bp-STR-12	B	HaeIII_Both-Ends_CC-390934_CID-397671:1509630_num=19	CCACAAACAGATGGATGGATGGGTGGATGGATGGATGGATGGATGGATGGATGGATGGATGGATGAGGTCATACCCAAACAGCTTGGAGTGCAAGTATTAAN98NCTTTCCACTTAGCGCCCTTTGGTTTGCATTGTGCAGAGGTCTCAGAGGGCATGAGCTGGGTTCTTTCCAAATTAAAGTAAATTGGAAGACATGTGTCATGG	R1@[1]TGGA:10:24:63@R2@len=276	[1]TGGA:10	0	38	0	0	0
			HaeIII_Both-Ends_CC-180805_CID-397670:1509630_num=150	CCACAAACAGATGGATGGATGGGTGGATGGATGGATGGATGGATGGATGGATGGATGGATGAGGTCATACCCAAACAGCTTGGAGTGCAAGTATTAATGTGN98NCTTTCCACTTAGCGCCCTTTGGTTTGCATTGTGCAGAGGTCTCAGAGGGCATGAGCTGGGTTCTTTCCAAATTAAAGTAAATTGGAAGACATGTGTCATGG	R1@[1]TGGA:9:24:59@R2@len=280	[1]TGGA:9	32	48	128	76	30
124	4bp-STR-13		HaeIII_Both-Ends_CC-189511_CID-2017248:2571688_num=140	CCCATATCCCACATTGCTCCTCGCTTGGAACCTTCAGGTTAAAAAAAACAAACAAACAAACAAACAACAAAAACGTCAGAAACACCATAAAGTAGTCAAAGN98NTTGCCTCAAGAGTCTAGGCAGAGCAATGCATTAACCACAGACTCTTCGCACTACTCCACCTACCCCCCGACTCTACACCCCCCGGGCAGGGCGGCTCCAGG	R1@[1]AAAC:5:46:65@R2@len=296	[1]AAAC:5	34	50	144	0	70
			HaeIII_Both-Ends_CC-61045_CID-2014553:2571688_num=345;Others-155690_CID-6613867:8361251_num=30	CCCATATCCCACATTGCTCCTCGCTTGGAACCTTCACGTTAAAAAAAACAAACAAACAAACAAACAAACAACAAAAACGTCAGAAACACCATAAAGTAGTCN98NTTGCCTCAAGAGTCTAGGCAGAGCAATGCATTAACCACAGACTCTTCGCACTACTCCACCTACCCCCCGACTCTACACCCCCCGGGCAGGGCGGCTCCAGG	R1@[1]AAAC:6:46:69@R2@len=292;R1@[1]AAAC:6:46:69@R2@len=292	[1]AAAC:6	76	150	0	398	128
125	4bp-STR-14		HaeIII_Both-Ends_CC-213271_CID-3655417:4080664_num=114	CCTTTGCTTGGTGTCACAGGTGCGGATAAGCTACATGCAACTAAAGAAGCTCCTGGAAGCCCCACTGCATGTGCCTGGGCTCTGCTCTCTTGCCGACTGCCN98NAGGGGTGACCTTACAGCGGTGGGTGAACTCCAGCCTGAGGTGGTTTTGTTTGTTTGTTTGTTTATTTTCTCTATGTGTTTTTAGACTGGTTCATTGAGAGG	R1@R2@[1]AAAC:4:39:54@len=300	[1]AAAC:4	62	64	0	0	120
			HaeIII_Both-Ends_CC-101549_CID-3655417:3842443_num=266;Others-344665_CID-8134794:8609538_num=20	CCTTTGCTTGGTGTCACAGGTGCGGATAAGCTACATGCAACTAAAGAAGCTCCTGGAAGCCCCACTGCATGTGCCTGGGCTCTGCTCTCTTGCCGACTGCCN98NGTGACCTTACAGCGGTGGGTGAACTCCAGCCTGAGGTGGTTTTGTTTGTTTGTTTGTTTGTTTATTTTCTCTATGTGTTTTTAGACTGGTTCATTGAGAGG	R1@R2@[1]AAAC:5:39:58@len=296;R1@[1]AAAC:5:39:58@R2@len=296	[1]AAAC:5	60	78	258	176	0
126	4bp-STR-15		HaeIII_Both-Ends_CC-215546_CID-2081672:4319723_num=112	CCCCAAACCCGTCACCAGTTCTTGCATGGATTATTTAGCGGAACAGCATGAACCACGACAAGCCTGCACCTGAAAATAATTATCTTGCGGGTCAGCCCTCAN98NTCTAAAATTGACATCGCTCTCCTACGGCAGCTCCAGAAGTGCAAAACCGCGGCTCGCTCACTTACACGCAGCAGTTTCATCCAGGCAGGCAGGCAGGCAGG	R1@R2@[1]CCTG:5:1:20@len=296	[1]CCTG:5	0	72	98	72	0
			HaeIII_Both-Ends_CC-163388_CID-2081672:3737315_num=172	CCCCAAACCCGTCACCAGTTCTTGCATGGATTATTTAGCGGAACAGCATGAACCACGACAAGCCTGCACCTGAAAATAATTATCTTGCGGGTCAGCCCTCAN98NAAATTGACATCGCTCTCCTACGGCAGCTCCAGAAGTGCAAAACCGCGGCTCGCTCACTTACACGCAGCAGTTTCATCCAGGCAGGCAGGCAGGCAGGCAGG	R1@R2@[1]CCTG:6:1:24@len=292	[1]CCTG:6	78	54	90	80	84
127	4bp-STR-16		HaeIII_Both-Ends_CC-244542_CID-2319692:4529229_num=86	CCGCGATCTCCATCCCAGATCATGCAATCACAGAGTCACAGTATAATTCAGGTTAGAAGGGACCCCAGGAGGTTTCTAGTTCAACCTCCTTCTCAAAGCAGN98NCTTGAGTGTCTTCATGGTGAGGACATGGCGCCATTTTTAAAGAAATATGTATTTATTTATTTGTATGTTTGTTTGTTTGTTTGTTTGTTTGTTTAGACAGG	R1@R2@[1]AAAC:7:8:35@len=288	[1]AAAC:7	64	0	0	68	44
			HaeIII_Both-Ends_CC-154480_CID-2319692:3488701_num=184;Others-751098_CID-6848385:7322536_num=12	CCGCGATCTCCATCCCAGATCATGCAATCACAGAGTCACAGTATAATTCAGGTTAGAAGGGACCCCAGGAGGTTTCTAGTTCAACCTCCTTCTCAAAGCAGN98NAGTGTCTTCATGGTGAGGACATGGCGCCATTTTTAAAGAAATATGTATTTATTTATTTGTATGTTTGTTTGTTTGTTTGTTTGTTTGTTTGTTTAGACAGG	R1@R2@[1]AAAC:8:8:39@len=284;R1@[1]AAAC:8:8:39@R2@len=284	[1]AAAC:8	68	110	106	54	54
128	4bp-STR-17		HaeIII_Both-Ends_CC-124850_CID-703011:4410406_num=227;Others-299335_CID-6063297:8538310_num=22	CCACTGTGCCAGAAATTATACTTTTTTTTAAGCTATTCATAAAGATAACAAGAGATGAAAAGGTTGTGTCGGGAGGGGGATCTTCTCTAGTTGGAAAACATN98NGTGGATGGATGGATGGATGGATGGATGGATGGATGGATGGATGGATGGATGGGAGAGGAGCCCGCCAAGGGACTCACACCCATCCTAGAGGGGCTGCAAGG	R1@R2@[1]CCAT:12:50:97@len=268;R1@R2@[1]CCAT:12:50:97@len=268	[1]CCAT:12	54	108	120	110	104
			HaeIII_Both-Ends_CC-250205_CID-703011:3771674_num=81	CCACTGTGCCAGAAATTATACTTTTTTTTAAGCTATTCATAAAGATAACAAGAGATGAAAAGGTTGTGTCGGGAGGGGGATCTTCTCTAGTTGGAAAACATN98NAGGGCAGCCAAGGTGGATGGATGGATGGATGGATGGATGGATGGATGGATGGGAGAGGAGCCCGCCAAGGGACTCACACCCATCCTAGAGGGGCTGCAAGG	R1@R2@[1]CCAT:9:50:85@len=280	[1]CCAT:9	82	0	0	0	92
129	4bp-STR-18		HaeIII_Both-Ends_CC-304701_CID-346478:1770048_num=47	CCAATAGAGCAAAACCCCCCACCCATCCATCCATCCATCCATCCATCCATCCATCCATCCATCCGTAGGTTAGCCAACACTGCAAGTCCCTGCTAAAGCTTN98NTGTAAATACAGCTCAGGAAGTGGCTGCTCCCCATTAGCTCGCTTGTAAAGGCAGCTTCCCTCGCTGCAGATCATATTCCAGTTGTTGAGCAGGCACTTGGG	R1@[1]CCAT:10:23:62@R2@len=276	[1]CCAT:10	0	18	34	46	0
			HaeIII_Both-Ends_CC-251765_CID-346479:1770048_num=80;Others-852762_CID-5875407:6487883_num=11	CCAATAGAGCAAAACCCCCCACCCATCCATCCATCCATCCATCCATCCATCCATCCATCCGTAGGTTAGCCAACACTGCAAGTCCCTGCTAAAGCTTTGCTN98NTGTAAATACAGCTCAGGAAGTGGCTGCTCCCCATTAGCTCGCTTGTAAAGGCAGCTTCCCTCGCTGCAGATCATATTCCAGTTGTTGAGCAGGCACTTGGG	R1@[1]CCAT:9:23:58@R2@len=280;R1@[1]CCAT:9:23:58@R2@len=280	[1]CCAT:9	40	0	42	0	94
130	4bp-STR-19		HaeIII_Both-Ends_CC-257049_CID-3356709:3623865_num=76	CCGGCAGCCCCGCGGAGCCCGTGATGCCCGCCCGCTGCCTGCCTGCCTGCCTGCCTGCCTGCCTGCCTGCCTGCCTGCCGGCGGGGGGCGCGCCTGTGTGCN98NATCCACTTGCTGCTCGCTGCTGGCGGGAGAAGAAACTGCAGCCGCCGGGAGGGAGGGATGGAGGGAGGGGGGTGTCGGTGCTGCGCACGGGGGGGACACGG	R1@[1]CTGC:11:35:78@R2@len=272	[1]CTGC:11	8	66	36	20	12
			HaeIII_Both-Ends_CC-330407_CID-3318277:3623865_num=36	CCGGCAGCCCCGCGGAGCCCGTGATGCCCGCCCGCTGCCTGCCTGCCTGCCTGCCTGCCTGCCTGCCTGCCTGCCTGCCTGCCGGCGGGGGGCGCGCCTGTN98NATCCACTTGCTGCTCGCTGCTGGCGGGAGAAGAAACTGCAGCCGCCGGGAGGGAGGGATGGAGGGAGGGGGGTGTCGGTGCTGCGCACGGGGGGGACACGG	R1@[1]CTGC:12:35:82@R2@len=268	[1]CTGC:12	14	0	0	34	24
131	4bp-STR-20		HaeIII_Both-Ends_CC-178163_CID-7885:1776999_num=153;Others-855520_CID-5667855:6878200_num=11	CCAAAAACTAATTCAACAACAACAAGAAGAAAATTTAAAAACAAACAAACAAACAAACAAACAAACAAACAAACAAACTTGTCCAGCCAAGAGTAAGTGTAN98NGAGTTTTTCAGTCAGTTCTGCTGAGCAGCATGAGAAAAATGGAACATGAAGTGTTCTGCCCTAGCTAGGAAGTAAACCTGAATATACAAATAAGTATAGGG	R1@[1]AAAC:10:39:78@R2@len=276;R1@[1]AAAC:10:39:78@R2@len=276	[1]AAAC:10	20	58	58	120	70
			HaeIII_Both-Ends_CC-270927_CID-8828:1776999_num=66	CCAAAAACTAATTCAACAACAACAAGAAGAAAATTTAAAAACAAACAAACAAACAAACAAACAAACAAACAAACTTGTCCAGCCAAGAGTAAGTGTAGTTGN98NGAGTTTTTCAGTCAGTTCTGCTGAGCAGCATGAGAAAAATGGAACATGAAGTGTTCTGCCCTAGCTAGGAAGTAAACCTGAATATACAAATAAGTATAGGG	R1@[1]AAAC:9:39:74@R2@len=280	[1]AAAC:9	18	56	70	0	0
132	4bp-STR-21		HaeIII_Both-Ends_CC-272525_CID-679286:1575181_num=65	CCACGGTGGTTCTCAGGAACCTGAGGGCTGTGCCACTATATCACGTGTTTGACAGACAGACAGACAGACAGTCTCAGTAGGAATATGGTGATTGGGTGAACN98NAGAAGTGTCATTTCTTTCTAGAGCTCCTGATGATCTTATTTTCCAACAGATGGACATAAGAGTATGATGAATTAACCTTCCATCTCCTGGAATTCCCATGG	R1@[1]GACA:5:51:70@R2@len=296	[1]GACA:5	56	0	50	0	28
			HaeIII_Both-Ends_CC-329889_CID-493995:1575181_num=36	CCACAGTGGTTCTCAGGAACCTGAGGGCTGTGCCATTATATCACGTGTTTGACAGACAGACAGACAGACAGACAGACTCAGTAGGAATATGGTGATTGGGTN98NAGAAGTGTCATTTCTTTCTAGAGCTCCTGATGATCTTATTTTCCAACAGATGGACATAAGAGTATGATGAATTAACCTTCCATCTCCTGGAATTCCCATGG	R1@[1]GACA:6:51:74@R2@len=292	[1]GACA:6	0	74	0	0	0
			HaeIII_Both-Ends_CC-133200_CID-470635:1575181_num=214	CCACAGTGGTTCTCAGGAACCTGAGGGCTGTGCCATTATATCACGTGTTTGACAGACAGACAGACAGACAGACAGACAGACAGACAGACTCAGTAGGAATAN98NAGAAGTGTCATTTCTTTCTAGAGCTCCTGATGATCTTATTTTCCAACAGATGGACATAAGAGTATGATGAATTAACCTTCCATCTCCTGGAATTCCCATGG	R1@[1]GACA:9:51:86@R2@len=280	[1]GACA:9	0	90	88	190	72
133	4bp-STR-22		HaeIII_Both-Ends_CC-284988_CID-1641348:4507540_num=58	CCATTCCTCTCAGTAGGATCATTTTAGCTGCATTATTCGTAACAGATGTCTGTCATATCTATTCTTAAATTCATGAGTGAATATTCCACACTCTTTGCACGN98NTCAAGAGATACAACTCCTTAGAGTAATCTCATCTCTAAAAGGAAAAAACAAACAAACAAACAACACAACAAAGAAGTTATTGTGTATATTTTACCTACAGG	R1@R2@[1]TTGT:4:39:54@len=300	[1]TTGT:4	24	20	20	0	60
			HaeIII_Both-Ends_CC-294186_CID-1256280:1641348_num=53	CCTGTAGGTAAAATATACACAATAACTTCTTTGTTGTGTTGTTTGTTTGTTTGTTTGTTTTTTCCTTTTAGAGATGAGATTACTCTAAGGAGTTGTATCTCN98NCGTGCAAAGAGTGTGGAATATTCACTCATGAATTTAAGAATAGATATGACAGACATCTGTTACGAATAATGCAGCTAAAATGATCCTACTGAGAGGAATGG	R1@[1]TTGT:5:39:58@R2@len=296	[1]TTGT:5	20	24	18	24	26
134	4bp-STR-23		HaeIII_Both-Ends_CC-15166_CID-578440:2875141_num=495;Others-191072_CID-1361144:6955863_num=28	CCTCCCTCTTCCCTTCCCTCCACCCCCTGGGAGGTCATCGAGTCTCTTTATGGTGCAAACCACACTTGGGGAGCTGCAAGCCCAGCAGGCTCCAGGATGGAN98NGGGTGCCCAGTCAGCACAGCACCCACCAGCATCCGTCCTCCATCCATCCATCCATCCATCCATCCATCCATCCATCCATCCCAGGGACAGTGCTGCCAGGG	R1@R2@[1]GGAT:10:21:60@len=276;R1@R2@[1]GGAT:10:21:60@len=276	[1]GGAT:10	168	222	222	162	272
		D	HaeIII_Both-Ends_CC-291067_CID-578440:2311532_num=54	CCTCCCTCTTCCCTTCCCTCCACCCCCTGGGAGGTCATCGAGTCTCTTTATGGTGCAAACCACACTTGGGGAGCTGCAAGCCCAGCAGGCTCCAGGATGGAN98NTGGCAGCAGGGCATTCTGACCACTGGGTGCCCAGTCAGCACAGCACCCACCAGCATCCGTCCTCCATCCATCCATCCATCCCAGGGACAGTGCTGTCAGGG	R1@R2@[1]GGAT:4:21:36@len=300	[1]GGAT:4	0	0	0	112	0
135	4bp-STR-24	C	HaeIII_Both-Ends_CC-300036_CID-877491:4430943_num=49	CCAGAGGGTCACGAAGAACGCTGGGAATTATTTCTCAGCAATTGCAGGGCTGTGTTCTAAAAACAAGAAAGAAACATAATAAAGATTATAACTCTTTGCTGN98NGCTACTCACATCTCAGAGTGCCCACCAAATAAAGCCAGGAGGGAAAAAACGGTCATGCAGCTGATTTTAAAAAACAAACAAACAAACAAAAAAAAGCCAGG	R1@R2@[1]TTTG:4:12:27@len=300	[1]TTTG:4	0	0	94	0	0
			HaeIII_Both-Ends_CC-35715_CID-877491:1162071_num=409;Others-106457_CID-6119479:6835491_num=35	CCAGAGGGTCACGAAGAACGCTGGGAATTATTTCTCAGCAATTGCAGGGCTGTGTTCTAAAAACAAGAAAGAAACATAATAAAGATTATAACTCTTTGCTGN98NCTCACATCTCAGACTGCCCACCAAATAAAGCCAGGAGGGAAAAAACGGTCATGCAGCTGATTTTAAAAAACAAACAAACAAACAAACAAAAAAAAGCCAGG	R1@R2@[1]TTTG:5:12:31@len=296;R1@R2@[1]TTTG:5:12:31@len=296	[1]TTTG:5	146	198	116	228	200
136	4bp-STR-25		HaeIII_Both-Ends_CC-307850_CID-1331322:4427613_num=46	CCAGTTCTAGGAAAAGAAAAACAAGGCGGGGGAGGGGGAGAATAAAAACAAACAAACAAACAAACCCAAACTTGGTGAAGTCAATGAAGTTGCTAGAGGTTN98NAGCAAGCCTTAATAATGTCTCTTAATGCCATAACAAAATGGATGAAAAATTTTACTGGCAGCTTTTCTATGTGTGGTTATTTCAAATGTAAACCAGACAGG	R1@[1]AAAC:5:46:65@R2@len=296	[1]AAAC:5	34	36	22	0	12
			HaeIII_Both-Ends_CC-226361_CID-1331323:4427613_num=102	CCAGTTCTAGGAAAAGAAAAACAAGGCGGGGGAGGGGGAGAATAAAAACAAACAAACAAACAAACAAACAAACCCAAACTTGGTGAAGTCAATGAAGTTGCN98NAGCAAGCCTTAATAATGTCTCTTAATGCCATAACAAAATGGATGAAAAATTTTACTGGCAGCTTTTCTATGTGTGGTTATTTCAAATGTAAACCAGACAGG	R1@[1]AAAC:7:46:73@R2@len=288	[1]AAAC:7	28	42	40	80	18
137	4bp-STR-26		HaeIII_Both-Ends_CC-310481_CID-830601:952572_num=44	CCAGACCGATTGCCTATTGTCTCCATCCATCCATCCATCCATCCCCCCAGACGTACGTGCACACCTGCACCTACACACACCCAGTTTCACTCTGATTTGTCN98NAGCTGAAGGATCAAAGAGCAAAGCTGGGACACTGTTTCCACACAGAGCATAGGCAGGGACTCCCTGCTCTCAGAAACCAGCCCAGTGTTTGTCCCTGCTGG	R1@[1]TCCA:5:22:41@R2@len=296	[1]TCCA:5	4	28	46	10	4
			HaeIII_Both-Ends_CC-412528_CID-830602:952572_num=15	CCAGACCGATTGCCTATTGTCTCCATCCATCCATCCATCCATCCATCCCCCCAGACGTACGTGCACACCTGCACCTACACACACCCAGTTTCACTCTGATTN98NAGCTGAAGGATCAAAGAGCAAAGCTGGGACACTGTTTCCACACAGAGCATAGGCAGGGACTCCCTGCTCTCAGAAACCAGCCCAGTGTTTGTCCCTGCTGG	R1@[1]TCCA:6:22:45@R2@len=292	[1]TCCA:6	8	0	20	0	0
138	4bp-STR-27		HaeIII_Both-Ends_CC-311195_CID-3360128:4895348_num=44	CCGGCAGTGAGTTGCCGGCACCCCAAATCCTCCCCTGACCCCCCCGGGGAAGGCACCCCAAGCCCCAGCACGGCTCTTTCTTCCCCAGCCAGCAACAGCCCN98NGGGGGCTGCGCCCCCCGGCTCCCGCCCTTGTACGGAACCAAGGGGGGACCGGAGGAGACAGACAGACAGACAGACAGACAGACAACACCCCCCCACAAAGG	R1@R2@[1]TGTC:7:18:45@len=288	[1]TGTC:7	14	16	2	54	10
			HaeIII_Both-Ends_CC-338589_CID-3360128:4895346_num=33	CCGGCAGTGAGTTGCCGGCACCCCAAATCCTCCCCTGACCCCCCCGGGGAAGGCACCCCAAGCCCCAGCACGGCTCTTTCTTCCCCAGCCAGCAACAGCCCN98NGCTGCGCCCCCCGGCTCCCGCCCTTGTACGGAACCAAGGGGGGACCGGAGGAGACAGACAGACAGACAGACAGACAGACAGACAACACCCCCCCACAAAGG	R1@R2@[1]TGTC:8:18:49@len=284	[1]TGTC:8	18	22	26	0	10
		C	HaeIII_Both-Ends_CC-408330_CID-3360128:4895349_num=16	CCGGCAGTGAGTTGCCGGCACCCCAAATCCTCCCCTGACCCCCCCGGGGAAGGCACCCCAAGCCCCAGCACGGCTCTTTCTTCCCCAGCCAGCAACAGCCCN98NCGCCCCCCGGCTCCCGCCCTTGTACGGAACCAAGGGGGGACCGGAGGAGACAGACAGACAGACAGACAGACAGACAGACAGACAACACCCCCCCACAAAGG	R1@R2@[1]TGTC:9:18:53@len=280	[1]TGTC:9	0	0	36	0	0
139	4bp-STR-28		HaeIII_Both-Ends_CC-312516_CID-1009724:1377516_num=44	CCAGCGCCCTTTGTGTAGCAGCCCTGGTTTAACATAAGAAGAAAAGCAGTATGTATTTATTTATTTATTTATTTTTAGTGTGCCTGAAGGAGTTAGGTGCTN98NTATAAGTTTACACAAAATAAACAGAGAATGCTTTCTGAAATGCTGAGAAAAGGTGTAACAAACTTCAGCCACTCGAGTTCTAGTAAAGTAGCAAAGTATGG	R1@[1]TATT:5:54:73@R2@len=296	[1]TATT:5	0	46	0	0	48
			HaeIII_Both-Ends_CC-236628_CID-1009723:1377516_num=93	CCAGCGCCCTTTGTGTAGCAGCCCTGGTTTAACCTAAGAAGAAAAGCAGTATGTATTTATTTATTTATTTATTTATTTATTTTTAGTGTGCCTGAAGGAGTN98NTATAAGTTTACACAAAATAAACAGAGAATGCTTTCTGAAATGCTGAGAAAAGGTGTAACAAACTTCAGCCACTCGAGTTCTAGTAAAGTAGCAAAGTATGG	R1@[1]TATT:7:54:81@R2@len=288	[1]TATT:7	84	24	24	38	28
140	4bp-STR-29		HaeIII_Both-Ends_CC-312697_CID-796000:4342003_num=43	CCAGAGCCAGACTGGCTATGTACAAAGACATAGCTCTGCCAGAGTGGATGCTGTGTTGGATGAGAGCCAGGTTTACGAGAGGACACACGCACATCTCCCCGN98NCCTACACTTCCAAGGGGCAGCTCCCCTCCCTTCCCCTCCCCTCCTGTCATGTTCCCCCGCCCCGCTTTCCCTTCCCTTCCCTCCCTCCCTCCCTGAGCAGG	R1@R2@[1]AGGG:4:8:23@len=300	[1]AGGG:4	8	12	28	26	14
			HaeIII_Both-Ends_CC-343636_CID-796000:4342005_num=31	CCAGAGCCAGACTGGCTATGTACAAAGACATAGCTCTGCCAGAGTGGATGCTGTGTTGGATGAGAGCCAGGTTTACGAGAGGACACACGCACATCTCCCCGN98NCACTTCCAAGGGGCAGCTCCCCTCCCTTCCCCTCCCCTCCTGTCATGTTCCCCCGCCCCGCTTTCCCTTCCCTTCCCTCCCTCCCTCCCTCCCTGAGCAGG	R1@R2@[1]AGGG:5:8:27@len=296	[1]AGGG:5	6	8	52	0	0
141	4bp-STR-30		HaeIII_Both-Ends_CC-320169_CID-369301:1405453_num=40	CCCATGCTCCTGAAATGGTGTATAATCAGTGGAATTCATCCATCCTTCTTTAGCTCTGTTTTCCTAGCTTCAGCAGCGAGTTATTAGTTTTAGCTTTTACTN98NTTCTCTATCCCTCTGCTTCACTTTGTTTGTTTGTTTGTTTTGTTTGCCTGTGTAGGAGCTAAGTAGTATTCTGGAAGCTCAAGAGAAGAGAGCAGATATGG	R1@R2@[1]AAAC:4:62:77@len=300	[1]AAAC:4	24	0	42	0	24
			HaeIII_Both-Ends_CC-218351_CID-369301:1405452_num=109;Others-956012_CID-6318350:6631314_num=10	CCCATGCTCCTGAAATGGTGTATAATCAGTGGAATTCATCCATCCTTCTTTAGCTCTGTTTTCCTAGCTTCAGCAGCGAGTTATTAGTTTTAGCTTTTACTN98NCTATCCCTCTGCTTCACTTTGTTTGTTTGTTTGTTTGTTTTGTTTGCCTGTGTAGGAGCTAAGTAGTATTCTGGAAGCTCAAGAGAAGAGAGCAGATATGG	R1@R2@[1]AAAC:5:62:81@len=296;R1@[1]AAAC:5:62:81@R2@len=296	[1]AAAC:5	6	76	66	90	0
142	4bp-STR-31	B	HaeIII_Both-Ends_CC-323852_CID-1421660:4825015_num=39	CCCTCACATCCCAGCTGCTGGCATGTAGGTGTTAAACTTTGTAATCCTCAGGTGTACACTGCTGTTCTGTGCAAGAGAGGGTAATTGATATGAGACCCCATN98NAGGAGATTCAAGAATGACGACTGCCAAAACGAACGAACAAACAAACAAACAAACAAACAAACAGGAAATCCTGTCACATACGTCCATCCACTTTCTAAAGG	R1@R2@[1]TGTT:7:39:66@len=288	[1]TGTT:7	2	76	2	2	2
			HaeIII_Both-Ends_CC-80214_CID-1421660:3635660_num=306;Others-250498_CID-6885415:8576126_num=24	CCCTCACATCCCAGCTGCTGGCATGTAGGTGTTAAACTTTGTAATCCTCAGGTGTACACTGCTGTTCTGTGCAAGAGAGGGTAATTGATATGAGACCCCATN98NGATTCAAGAATGACGACTGCCAAAACGAACGAACAAACAAACAAACAAACAAACAAACAAACAGGAAATCCTGTCACATACGTCCATCCACTTTCTAAAGG	R1@R2@[1]TGTT:8:39:70@len=284;R1@R2@[1]TGTT:8:39:70@len=284	[1]TGTT:8	64	66	208	170	152
143	4bp-STR-32		HaeIII_Both-Ends_CC-327802_CID-3273731:4327047_num=37	CCGCTCTCCCCCGGGGAGGCAGGGAGGGAGGGAGGGTTCATCTGCTTTTTGGCAGCCTGGTGTCTTCATGGCATCCCGCAGGGAGGAGTGTAACCAGTATCN98NACGATCGGTCTCCAGTCACCGTTTGTGTACGTGTAAGCCCCTCTCTCTGCGGGAGATGCTCACAGGTACAAGGGGACGGCTTCTCCCTGCAGCGGCACAGG	R1@[1]AGGG:4:21:36@R2@len=300	[1]AGGG:4	0	40	4	44	0
			HaeIII_Both-Ends_CC-201945_CID-2438112:4327047_num=126;Others-604565_CID-7356028:8422923_num=14	CCGCTCTCCCCCGGGGAGGCAGGGAGGGAGGGAGGGAGGGTTCATCTGCTTTTTGGCAGCCTGGTGTCTTCATGGCATCCCGCAGGGAGGAGTGTAACCAGN98NACGATCGGTCTCCAGTCACCGTTTGTGTACGTGTAAGCCCCTCTCTCTGCGGGAGATGCTCACAGGTACAAGGGGACGGCTTCTCCCTGCAGCGGCACAGG	R1@[1]AGGG:5:21:40@R2@len=296;R1@[1]AGGG:5:21:40@R2@len=296	[1]AGGG:5	74	20	70	46	66
144	4bp-STR-33		HaeIII_Both-Ends_CC-328121_CID-2593642:4832558_num=37	CCCGGGAGCTCTGGGCATCACCAAAGCCTGTTTGTCCAGGCAGGCTCTACATATGTTCCCCCCAGCTGCAGTTCTGCGGACTGTCAGCACGTAGGTGAAGTN98NGCACCTCTCTGCCCAAGAGCCAACCTCACCTCTCAGCAGCTGGATCAGCTAGCTCCAGGTAAATAATTAAATAAATAAATAAATAAATAAATAAATAAAGG	R1@R2@[1]TTTA:8:3:34@len=284	[1]TTTA:8	8	38	16	14	4
			HaeIII_Both-Ends_CC-415822_CID-2593642:4832560_num=15	CCCGGGAGCTCTGGGCATCACCAAAGCCTGTTTGTCCAGGCAGGCTCTACATATGTTCCCCCCAGCTGCAGTTCTGCGGACTGTCAGCACGTAGGTGAAGTN98NCTCTCTGCCCAAGAGCCAACCTCACCTCTCAGCAGCTGGATCAGCTAGCTCCAGGTAAATAATTAAATAAATAAATAAATAAATAAATAAATAAATAAAGG	R1@R2@[1]TTTA:9:3:38@len=280	[1]TTTA:9	4	0	22	0	4
145	4bp-STR-34		HaeIII_Both-Ends_CC-355219_CID-2022922:3179591_num=28	CCCATCAGCTAAGATGCTTTGTCTTTTTGTTTTTTCGTTTTTGTTTGTTTGTTTGTTCTTTTAAAAAAAAAAGCAAACGGAAAGATTCAGAGCCACGGACAN98NAAGGCAGGCGTGGAGCAACTGCCCTTTCCTTAGCCCCTTCCTGCCTGCGCGAAGGCTGCCGCAGTGCTGCCTTTGAGACCTAATGCTAACCTAGGATGCGG	R1@[1]TTTG:4:40:55@R2@len=300	[1]TTTG:4	0	24	34	0	0
			HaeIII_Both-Ends_CC-204815_CID-2022921:3179591_num=123;Others-551668_CID-6617418:7267956_num=15	CCCATCAGCTAAGATGCTTTGTCTTTTTGTTTTTTCGTTTTTGTTTGTTTGTTTGTTTGTTCTTTTAAAAAAAAAAGCAAACGGAAAGATTCAGAGCCACGN98NAAGGCAGGCGTGGAGCAACTGCCCTTTCCTTAGCCCCTTCCTGCCTGCGCGAAGGCTGCCGCAGTGCTGCCTTTGAGACCTAATGCTAACCTAGGATGCGG	R1@[1]TTTG:5:40:59@R2@len=296;R1@[1]TTTG:5:40:59@R2@len=296	[1]TTTG:5	48	38	32	56	92
146	4bp-STR-35		HaeIII_Both-Ends_CC-358278_CID-2537310:3349132_num=27	CCTGCAGGGGATGGATGGATGGATGGATGGATGGATGGGGGGCTCTCCCCTGCCACAGGCACTGTTCCAGGGTGCCACTGGGCACGGGGAGAGCCGTGGTGN98NTGTTCTTGGGGACACCAAAGTGGGCTTCAGTGGGGCAAGCCAGGCTCGCTGCTCAAACCCATCCAGAGGACGTTTGATGTCTCCACTGAGCTGTTTGCCGG	R1@[1]GGAT:7:9:36@R2@len=288	[1]GGAT:7	0	38	0	18	0
			HaeIII_Both-Ends_CC-248023_CID-3349132:4290409_num=83	CCGGCAAACAGCTCAGTGGAGACATCAAACGTCCTCTGGATGGGTTTGAGCAGCGAGCCTGGCTTGCCCCACTGAAGCCCACTTTGGTGTCCCCAAGAACAN98NCTCTCCCCGTGCCCAGTGGCACCCTGGAACAGTGCCTGTGGCAGGGGAGAGCCCCCCATCCATCCATCCATCCATCCATCCATCCATCCATCCCCTGCAGG	R1@R2@[1]GGAT:9:9:44@len=280	[1]GGAT:9	26	0	104	22	22
147	4bp-STR-36	C	HaeIII_Both-Ends_CC-364428_CID-4559951:4635808_num=25	CCTGTGTAGCAGAGCAAACTCTGAAGTGTGTAGTGAAGGTAATGAATGGAGATTTGTTCTTTTTTGTAAGAAGTCATATCTATAGACCTGGTTCTCTATGAN98NTTTTTGTTTTGTTTGTTTGTTTGTTTTTAGCCAAGGACCTGACTACATGTTCTTTTGAAGAGGAGATTGCTTCCTTGATGACGGATGCTACTTCCATAAGG	R1@R2@[1]AAAC:4:76:91@len=300	[1]AAAC:4	0	0	54	0	4
			HaeIII_Both-Ends_CC-195173_CID-4559951:4635805_num=133;Others-538378_CID-8428198:8477898_num=15	CCTGTGTAGCAGAGCAAACTCTGAAGTGTGTAGTGAAGGTAATGAATGGAGATTTGTTCTTTTTTGTAAGAAGTCATATCTATAGACCTGGTTCTCTATGAN98NTGTTTTGTTTGTTTGTTTGTTTGTTTTTAGCCAAGGACCTGACTACATGTTCTTTTGAAGTGGAGATTGCTTCCTTGATGACGGATGCTACTTCCATAAGG	R1@R2@[1]AAAC:5:76:95@len=296;R1@R2@[1]AAAC:5:76:95@len=296	[1]AAAC:5	72	40	38	78	64
148	4bp-STR-37	C	HaeIII_Both-Ends_CC-385774_CID-4341213:4436676_num=20	CCTGCTCACCCCACAAGCCCTGCTGCAGGAAAAGCCAAATGAACCTCTTCCATCCATCCATCCATCCATCCATCCATCCATCCATCCATCCATGTGGCTAGN98NTCTGAATCTTTACTGGAACTTAAAGGATTTTAAAGAATAATTTCTACAGCAACCTGCTGGTTGCAGCCCTGCTGAGATTTCCCCATGATTTTTCTCCCAGG	R1@[1]TCCA:11:49:92@R2@len=272	[1]TCCA:11	2	4	34	0	2
			HaeIII_Both-Ends_CC-189179_CID-4325948:4436676_num=140	CCTGCTCACCCCACAAGCCCTGCTGCAGGAAAAGCCAAATGAACCTCTTCCATCCATCCATCCATCCATCCATCCATCCATCCATCCATCCATCCATGTGGN98NTCTGAATCTTTACTGGAACTTAAAGGATTTTAAAGAATAATTTCTACAGCAACCTGCTGGTTGCAGCCCTGCTGAGATTTCCCCATGATTTTTCTCCCAGG	R1@[1]TCCA:12:49:96@R2@len=268	[1]TCCA:12	66	70	22	54	80
149	4bp-STR-38		HaeIII_Both-Ends_CC-407744_CID-3907391:4927598_num=16	CCTCATCTGTATAACATACAGTGGGAATGGTGATAAATAAATAAGTAAATAAATAAATAAATAAATAAAAGTATACCAAGAAGACAGAAAACATTTAGAAGN98NATTACCACCATCATCACCATTTCAGAGCTAAAGATGAGGCAATGTAAACTCAGACTCCCTCTTGCTATAACACGGGCTGGTGTGATTACTTCCCAAAAAGG	R1@[1]TAAA:6:46:69@R2@len=292	[1]TAAA:6	0	18	0	0	14
			HaeIII_Both-Ends_CC-245613_CID-3180614:4927598_num=85	CCTCATCTGTATAACATACAGTGGGAATGGTGATAAATAAATAAGTAAATAAATAAATAAATAAATAAATAAAAGTATACCAAGAAGACAGAAAACATTTAN98NATTACCACCATCATCACCATTTCAGAGCTAAAGATGAGGCAATGTAAACTCAGACTCCCTCTTGCTATAACACGGGCTGGTGTGATTACTTCCCAAAAAGG	R1@[1]TAAA:7:46:73@R2@len=288	[1]TAAA:7	54	14	42	46	24
150	4bp-STR-39		HaeIII_Both-Ends_CC-408968_CID-2846544:3396983_num=16	CCCTGCGGGCGGCAGGGGCTGAACAAACCGCCGTCCGTCTTTCCATCCATCCCTCCGTTCAGCCATCCCTCCGTCCATCCATTTATCCATCCATCCCTTCCN98NTCCCTCCCTGGACCCCTGCATCCCTCCCTCCCTCCCTCCATCCTCCCCACACGGATCCCCGCATCCCCCCATCCCTTCACCCTCCCGAAACAACGTCCCGG	R1@R2@[1]GGAG:4:63:78@len=300	[1]GGAG:4	10	8	0	14	0
			HaeIII_Both-Ends_CC-338860_CID-2846544:3396982_num=33	CCCTGCGGGCGGCAGGGGCTGAACAAACCGCCGTCCGTCTTTCCATCCATCCCTCCGTTCAGCCATCCCTCCGTCCATCCATTTATCCATCCATCCCTTCCN98NTGGACCCCTGCATCCCTCCCTCCCTCCCTCCCTCCCTCCATCCTCCCCACACGGATCCCCGCATCCCCCCATCCCTTCACCCTCCCGAAACAACGTCCCGG	R1@R2@[1]GGAG:6:63:86@len=292	[1]GGAG:6	2	12	22	20	12
151	4bp-STR-40		HaeIII_Both-Ends_CC-414941_CID-326469:447460_num=15	CCAAGTGCAAGGTCCTGCACCTGGGTCAGGGCAATCCCCAGGACCAGCACAGACTGGGGGATGGAGGGATGGATGGATGGATGGATGGATGGAGAGCAGCCN98NCTGGGGGACACTGGTGGGTGACAAATGGGACATCAGCCGGCAATGTGCGCTTGCAGCCCAGAAAGCCAAGCGTCTCCCGGGCTGCAGCAGCAGCAGCGTGG	R1@[1]GGAT:6:67:90@R2@len=292	[1]GGAT:6	8	16	2	0	8
			HaeIII_Both-Ends_CC-234734_CID-326409:447460_num=94	CCAAGTGCAAGGTCCTGCACCTGGGTCAGGGCAATCCCCAGGACCAGCACAGACTGGGGGATGGAGGGATGGATGGATGGATGGATGGATGGATGGAGAGCN98NCTGGGGGACACTGGTGGGTGACAAATGGGACATCAGCCGGCAATGTGCGCTTGCAGCCCAGAAAGCCAAGCGTCTCCCGGGCTGCAGCAGCAGCAGCGTGG	R1@[1]GGAT:7:67:94@R2@len=288	[1]GGAT:7	20	10	104	28	14
152	4bp-STR-41		HaeIII_Both-Ends_CC-421815_CID-3586696:3733674_num=14	CCGTGCGAGACTGCTGGTGGTGCAGAGATTGCCTGCTAGCCACATGGGTGAAAGCAGACAAAGTCAGAAATACCCCCATGCTCTGGAGCCTCCTTTCTCCTN98NGACTTTCCATGAATCTGCACAGGGGTAAAGATAGATAGATAGATGGGAAGGAAGGAGTGGCAATGCCAATGCAGAAAATTGCTAATTGTTTCCATGGTAGG	R1@R2@[1]ATCT:4:58:73@len=300	[1]ATCT:4	0	16	0	12	0
			HaeIII_Both-Ends_CC-258338_CID-3586696:3733140_num=75	CCGTGCGAGACTGCTGGTGGTGCAGAGATTGCCTGCTAGCCACATGGGTGAAAGCAGACAAAGTCAGAAATACCCCCATGCTCTGGAGCCTCCTTTCTCCTN98NTTCCATGAATCTGCACAGGGGTAAAGATAGATAGATAGATAGATGGGAAGGAAGGAGTGGCAATGCCAATGCAGAAAATTGCTAATTGTTTCCATGGTAGG	R1@R2@[1]ATCT:5:58:77@len=296	[1]ATCT:5	16	32	78	20	10
153	4bp-STR-42		HaeIII_Both-Ends_CC-86759_CID-2220263:4386177_num=293;Others-239903_CID-2089514:10840640_num=25	CCCCCAGGAGCAAACACAATCTCTTCACTCTGCAATGCCAAAAATAGAAGCGTTTGTATTTAAATTGCGAAGAATCGAGTTTGGCAAACAATCCGTATGACN98NCAGATTGCAGGAGCAGGGAGAAATACGGCACTAATGTTCTCCTGTCTGTCTGTCTGTCTCCCCCGCTCCATCCCCATCCCCTGCAGCCTGCCTGCTCCAGG	R1@R2@[1]AGAC:4:43:58@len=300;R1@R2@[1]AGAC:4:43:58@len=300	[1]AGAC:4	98	152	158	170	56
		E	HaeIII_Both-Ends_CC-345300_CID-2220263:4386176_num=31	CCCCCAGGAGCAAACACAATCTCTTCACTCTGCAATGCCAAAAATAGAAGCGTTTGTATTTAAATTGCGAAGAATCGAGTTTGGCAAACAATCCGTATGACN98NTTGCAGGAGCAGGGAGAAATATGGCACTAATGTTCTCCTGTCTGTCTGTCTGTCTGTCTCCCCCGCTCCATCCCCATCCCCTGCAGCCTGCCTGCTCCAGG	R1@R2@[1]AGAC:5:43:62@len=296	[1]AGAC:5	0	0	0	0	68
154	4bp-STR-43		HaeIII_Both-Ends_CC-86860_CID-1530544:3329827_num=293;Others-152918_CID-8295234:8538106_num=30	CCTTGCAGATTGACCACACGGGCTGTGAAACTAGGGTGACAACTGTCAAAAATACGTCAGGTGACGGGTCATCCTTTTGCATAACTAAGCTGGCTGTGCCAN98NTTACTCCCAGATAAGTTAAAACAAACCAACCAACCAACCAACCACCTAAACAGTTGTGGGGAACAGAAGAGCATCCTGATTTTTACAGCACGTTGCTCAGG	R1@R2@[1]TGGT:5:58:77@len=296;R1@[1]TGGT:5:58:77@R2@len=296	[1]TGGT:5	76	178	92	200	100
			HaeIII_Both-Ends_CC-193029_CID-1530544:3329826_num=136;Others-732476_CID-8295235:8538106_num=12	CCTTGCAGATTGACCACACGGGCTGTGAAACTAGGGTGACAACTGTCAAAAATACGTCAGGTGACGGGTCATCCTTTTGCATAACTAAGCTGGCTGTGCCAN98NAGATAAGTTAAAACAAACCAACCAACCAACCAACCAACCAACCACCTAAACAGTTGTGGGGAACAGAAGAGCATCCTGATTTTTACAGCACGTTGCTCAGG	R1@R2@[1]TGGT:7:58:85@len=288;R1@[1]TGGT:7:58:85@R2@len=288	[1]TGGT:7	86	0	106	0	104
155	4bp-STR-44		MboI_Both-Ends_GATC-113259_CID-545432:655113_num=24	GATCCAATGTGCGCGCACACACTCACTCACTCACTCACTCACTCACAAAGGGGGGAAACTCTCTGCCTCCCCTGGGTACCCAGAGGATGCAATCGCTCACCN98NCCCGACCCAAGGGGAGAGGTTTCGAACACAGACCCGCTGCGCTGAGAAGACCGCTCCAAGGGGGTCTCTGGCGGCTCCCCATTTATACCCTGGGTGGGATC	R1@[1]CACT:6:20:43@R2@len=292	[1]CACT:6	22	10	2	10	20
			MboI_Both-Ends_GATC-203623_CID-545433:655113_num=13	GATCCAATGTGCGCGCACACACTCACTCACTCACTCACTCACTCACTCACTCACAAAGGGGGGAAACTCTCTGCCTCCCCTGGGTACCCAGAGGATGCAATN98NCCCGACCCAAGGGGAGAGGTTTCGAACACAGACCCGCTGCGCTGAGAAGACCGCTCCAAGGGGGTCTCTGGCGGCTCCCCATTTATACCCTGGGTGGGATC	R1@[1]CACT:8:20:51@R2@len=284	[1]CACT:8	0	12	12	12	0
156	4bp-STR-45		MboI_Both-Ends_GATC-173768_CID-503609:876143_num=16	GATCATTTCATTTATGTATTAATGTATTTAAACTCCGTGTTTTGGTTACTGAACTATACGGATGGATGGATGGATGGATGGATGATAAACAGTGGCCAGCGN98NAGTAGTTAAATGGTCAGATAAAACTATTACCTCTAGGGGCATGCAACTGGTTTTAGTTACATGTGGAAGCTTGATTCTACAAGCCCAACACAGACAGGATC	R1@[1]GGAT:6:60:83@R2@len=292	[1]GGAT:6	0	8	6	10	22
			Others-685867_CID-5559502:8065299_num=13	ATTTCATTTATGTATTAATGTATTTAAACTCCGTGTTTTGGTTACTGAACTATACGGATGGATGGATGGATGGATGGATGGATGATAAACAGTGGCCAGCGN98NAGTAGTTAAATGGTCAGATAAAACTATTACCTCTAGGGGCATGCAACTGGTTTTAGTTACATGTGGAAGCTTGATTCTACAAGCCCAACACAGACAGGATC	R1@[1]GGAT:7:56:83@R2@len=288	[1]GGAT:7	6	6	0	14	0
157	4bp-STR-46		MboI_Both-Ends_GATC-49032_CID-847475:899258_num=39;Others-737213_CID-8056943:8071894_num=12	GATCCTGCACAGCAGCCACGCAGCACTGGGACACAGCGGCGCGTGGGGGCTGCAGGGACCAGTCCCACAGGGAAGCCCCGCCGCTGCCACTGGGGCAGGCTN98NTCCCGGCTGGGGGGCGGTGGGGCGGGGGATGGATACACGACGGGTAATCGCCCGTCCGTCCGTCCGTCCACCAGAGAGCTGGGAAGAGCCAGAGAAGGATC	R1@R2@[1]GGAC:4:33:48@len=300;R1@R2@[1]GGAC:4:33:48@len=300	[1]GGAC:4	18	16	14	0	52
			MboI_Both-Ends_GATC-35224_CID-847475:899260_num=45	GATCCTGCACAGCAGCCACGCAGCACTGGGACACAGCGGCGCGTGGGGGCTGCAGGGACCAGTCCCACAGGGAAGCCCCGCCGCTGCCACTGGGGCAGGCTN98NGGCTGGGGGGCGGTGGGGCGGGGGATGGATACACGACGGGTAATCGCCCGTCCGTCCGTCCGTCCGTCCACCAGAGAGCTGGGAAGAGCCAGAGAAGGATC	R1@R2@[1]GGAC:5:33:52@len=296	[1]GGAC:5	6	18	4	40	32
158	4bp-STR-47		Others-1000550_CID-1594561:8065299_num=10	ATTTCATTTATGTATTAATGTATTTAAACTCCGTGTTTTGGTTACTGAACTATACGGATGGATGGATGGATGGATGATAAACAGTGGCCAGCGACACTGTTN98NAGTAGTTAAATGGTCAGATAAAACTATTACCTCTAGGGGCATGCAACTGGTTTTAGTTACATGTGGAAGCTTGATTCTACAAGCCCAACACAGACAGGATC	R1@[1]GGAT:5:56:75@R2@len=296	[1]GGAT:5	8	0	10	0	2
			Others-185875_CID-5559503:8065299_num=28	ATTTCATTTATGTATTAATGTATTTAAACTCCGTGTTTTGGTTACTGAACTATACGGATGGATGGATGGATGGATGGATGATAAACAGTGGCCAGCGACACN98NAGTAGTTAAATGGTCAGATAAAACTATTACCTCTAGGGGCATGCAACTGGTTTTAGTTACATGTGGAAGCTTGATTCTACAAGCCCAACACAGACAGGATC	R1@[1]GGAT:6:56:79@R2@len=292	[1]GGAT:6	0	12	10	26	36
			Others-685867_CID-5559502:8065299_num=13	ATTTCATTTATGTATTAATGTATTTAAACTCCGTGTTTTGGTTACTGAACTATACGGATGGATGGATGGATGGATGGATGGATGATAAACAGTGGCCAGCGN98NAGTAGTTAAATGGTCAGATAAAACTATTACCTCTAGGGGCATGCAACTGGTTTTAGTTACATGTGGAAGCTTGATTCTACAAGCCCAACACAGACAGGATC	R1@[1]GGAT:7:56:83@R2@len=288	[1]GGAT:7	6	6	0	14	0
159	4bp-STR-48		Others-226554_CID-10481985:13739376_num=26	GATCAGTGCTGTCTACTTCAAGGGACTGCAAAGAGTAGGAAGGGGGAAGAACTCACCAGGAGTGAAAGACCTGAGTCTCCACAGTAAAAAACAGTGGTTAAN98NACACATGACTGTCACTAAATGCTCTTAGCAACCACAATGCAAAAAAGAAACAAACAGAAAACAAACAAACAAACAAACCAACCACCACCAAGATATTATTC	R1@R2@[1]GTTT:5:24:43@len=296	[1]GTTT:5	22	14	0	12	4
			Others-79491_CID-437939:10481985_num=39	GAATAATATCTTGGTGGTGGTTGGTTTGTTTGTTTGTTTGTTTGTTTTCTGTTTGTTTCTTTTTTGCATTGTGGTTGCTAAGAGCATTTAGTGACAGTCATN98NTTAACCACTGTTTTTTACTGTGGAGACTCAGGTCTTTCACTCCTGGTGAGTTCTTCCCCCTTCCTACTCTTTGCAGTCCCTTGAAGTAGACAGCACTGATC	R1@[1]GTTT:6:24:47@R2@len=292	[1]GTTT:6	28	14	18	18	24
160	4bp-STR-49		Others-307944_CID-1568228:7825552_num=22	ATTTAATGTCTGATGCTAAAAGGGTATGTCTGGACCTCCATACCCTAGCACATGGTCTTATTCTACAAACTGAAAGAGATGCGGCAACACAGTTTATCCGAN98NTGAGTAAAACTACTATCCTCTGGTTTGAAGAAAAATGCTCTTCAGAGGAAATAGATGGCATGCTATATCTATCAATCAATCAATCAATCATTTGCTTGATC	R1@R2@[1]TGAT:5:12:31@len=296	[1]TGAT:5	4	16	10	10	4
			Others-635525_CID-1568228:7825553_num=14	ATTTAATGTCTGATGCTAAAAGGGTATGTCTGGACCTCCATACCCTAGCACATGGTCTTATTCTACAAACTGAAAGAGATGCGGCAACACAGTTTATCCGAN98NTAAAACTACTATCCTCTGGTTTGAAGAAAAATGCTCTTCAGAGGAAATAGATGGCATGCTATATCTATCAATCAATCAATCAATCAATCATTTGCTTGATC	R1@R2@[1]TGAT:6:12:35@len=292	[1]TGAT:6	10	0	0	10	8
161	4bp-STR-50		Others-345882_CID-7977399:8067796_num=20	CATCCAGCCATGTAGGATAACCTCGCTGGAAGCATGTATGGGTGGGGAGTTAATATGCCTCTTCCACACGAGGGATGGATGAATGGATGGATGGATGGATGN98NTCTCTCTGCATGTCACTATTTATTTTGGTGTTTCAGTAACTACGAATGCCAGGTACTCTTTCAAAATAATGGTTTCTTTAATTATTTGTACCTTAAGGATC	R1@[1]ATGG:4:83:98@R2@len=300	[1]ATGG:4	14	8	6	0	12
			Others-769408_CID-3962074:8067796_num=12	ATCCAGCCATGTAGGATAACCTCGCTGGAAGCATGTATGGGTGGGGAGTTAATATGCCTCTTCCACACGAGGGATGGATGAATGGATGGATGGATGGATGGN98NTCTCTCTGCATGTCACTATTTATTTTGGTGTTTCAGTAACTACGAATGCCAGGTACTCTTTCAAAATAATGGTTTCTTTAATTATTTGTACCTTAAGGATC	R1@[1]ATGG:5:82:101@R2@len=296	[1]ATGG:5	6	8	10	10	10
162	4bp-STR-51		Others-442922_CID-12654217:13739376_num=18	GTGCTGTCTACTTCAAGGGACTGCAAAGAGTAGGAAGGGGGAAGAACTCACCAGGAGTGAAAGACCTGAGTCTCCACAGTAAAAAACAGTGGTTAAGAAGTN98NACACATGACTGTCACTAAATGCTCTTAGCAACCACAATGCAAAAAAGAAACAAACAGAAAACAAACAAACAAACAAACCAACCACCACCAAGATATTATTC	R1@R2@[1]GTTT:5:24:43@len=296	[1]GTTT:5	10	6	0	10	10
			Others-201789_CID-437939:12654217_num=27	GAATAATATCTTGGTGGTGGTTGGTTTGTTTGTTTGTTTGTTTGTTTTCTGTTTGTTTCTTTTTTGCATTGTGGTTGCTAAGAGCATTTAGTGACAGTCATN98NACTTCTTAACCACTGTTTTTTACTGTGGAGACTCAGGTCTTTCACTCCTGGTGAGTTCTTCCCCCTTCCTACTCTTTGCAGTCCCTTGAAGTAGACAGCAC	R1@[1]GTTT:6:24:47@R2@len=292	[1]GTTT:6	12	4	14	18	6
